# Supplementary material for: Catalytic and Non-Catalytic Roles for the Mono-ADP-Ribosyltransferase Arr in the Mycobacterial DNA Damage Response
Source: PLoS One. 2011 Jul 18;6(7):e21807. doi: 10.1371/journal.pone.0021807 (PMC3138739; doi:10.1371/journal.pone.0021807)
Supplement: Table S1 — I-SceI microarray- Ratio of M. smegmatis gene transcript levels in mgm182 (site(+)) as compared to mgm181 (site(−)) at both growth phases and all timepoints. (XLSX) [file pone.0021807.s001.xlsx]

## Sheet: Table S1
Table S1. Ratio of M. smegmatis gene transcript levels in mgm182 (site+) as compared to mgm181 (site-) at both growth phases and all timeponts
File Name ()*	log time 0 no ATc site+/site-		log time 45m with ATc site+/site-		stat time 0 no ATc site+/site-		stat time 15m with ATc site+/site-		stat time 45m with ATc site+/site-
Systematic	Normalized	t-test P-value	Normalized	t-test P-value	Normalized	t-test P-value	Normalized	t-test P-value	Normalized	t-test P-value
MSMEG0001	1.2827	0.337059	1.07929	0.433544	0.837056	0.0285494	0.790613	0.110868	0.723017	0.0071325
MSMEG0002	0.855395	0.0494558	1.19713	0.074803	0.814386	0.265554	0.927629	0.619159	0.922887	0.704828
MSMEG0003	1.15234	0.409111	1.07528	0.350872	1.43951	0.0767312	1.26476	0.101839	1.35248	0.0521193
MSMEG0004	1.19809	0.194356	2.17393	0.00878004	1.29433	0.0962514	1.09737	0.242486	1.18636	0.288294
MSMEG0005	1.37544	0.0209488	1.49308	1.93119e-05	2.07447	0.000363042	1.87511	0.00308793	1.81008	0.0041594
MSMEG0006	3.26458	4.17295e-08	1.59841	6.84053e-05	3.09674	2.24279e-06	2.96832	4.1955e-05	4.98096	0.000244786
MSMEG0007	2.03622	0.00738113	1.489	0.000726422	1.77748	0.029735	2.39194	0.000503798	2.03408	0.00356958
MSMEG0009	1.00618	0.957236	0.780571	0.0661571	0.567639	0.0516574	0.621044	0.140477	0.78018	0.31455
MSMEG0011	1.51943	0.0190261	0.990786	0.944451	1.44369	0.0365047	1.1204	0.596862	1.60947	0.0929168
MSMEG0012	2.64873	5.94552e-05	1.16638	0.160511	2.57769	0.000383598	2.26273	2.9626e-05	2.69778	6.19521e-09
MSMEG0013	1.24379	0.114518	1.14335	0.0450523	1.78778	0.0344142	2.02545	0.00620777	2.01219	0.0122173
MSMEG0014	0.718396	0.00533018	0.832165	0.267712	0.65655	0.15705	0.615407	0.0957377	0.526825	0.034488
MSMEG0015	0.496849	0.00312103	0.755947	0.000745594	0.912755	0.107291	0.843044	0.0280903	0.984156	0.901189
MSMEG0016	2.29779	0.000754554	1.16035	0.00181536	1.72096	0.000243514	1.67333	0.00291021	1.5903	0.00491787
MSMEG0017	1.15261	0.0538312	0.782281	0.0129004	1.93274	0.0252887	1.81332	0.0200854	2.04791	0.00104081
MSMEG0018	1.04089	0.899746	0.915581	0.529135	0.629181	0.0367351	0.555251	0.000855181	0.892762	0.636297
MSMEG0019	0.712697	0.0278796	0.616263	0.00153351	0.733155	0.155191	0.473413	0.00215666	0.581149	0.00817977
MSMEG0020	0.658308	0.11432	1.31586	0.000995142	1.23421	0.155586	1.92137	0.00567695	2.68025	9.60742e-06
MSMEG0021	0.480712	0.00112099	1.03951	0.720155	0.999858	0.999384	0.901918	0.51131	1.13212	0.227573
MSMEG0022	0.572662	5.16478e-05	1.44967	0.0187754	1.88464	2.41096e-07	1.83702	7.02236e-06	2.80308	1.3392e-09
MSMEG0023
MSMEG0024	0.840198	0.0750517	1.62021	0.000321406	1.18603	9.28039e-05	1.34985	0.024484	1.31596	2.90307e-05
MSMEG0025	0.531283	0.000750753	0.862074	0.121582	0.755137	0.0457287	0.71677	0.065733	1.41224	0.342177
MSMEG0026	0.524878	0.0192847	0.874184	0.139292	0.942165	0.807271	1.22004	0.321431	0.877477	0.637814
MSMEG0027	0.937217	0.518361	1.14653	0.397939	2.2338	0.00867815	1.70492	0.0430794	1.62668	0.0385042
MSMEG0028	1.19835	0.293091	1.11886	0.0745834	1.35259	0.00422356	1.37372	0.0715357	1.34843	0.0548516
MSMEG0029	0.765702	0.00246278	1.03039	0.689585	1.06396	0.726237	1.01093	0.951881	0.918815	0.745118
MSMEG0030	1.05975	0.769504	1.24308	0.153767	1.19277	0.106656	1.22992	0.334096	1.29075	0.112415
MSMEG0031	1.20828	0.224246	0.734393	1.51041e-05	0.785076	0.313154	0.900617	0.72826	0.982744	0.940622
MSMEG0032	3.31387	0.000129019	1.40133	3.42452e-06	1.73465	0.00629381	2.29535	0.000138107	2.19028	9.98743e-06
MSMEG0033	1.04064	0.757162	0.929969	0.453698	0.840657	0.523487	0.750032	0.218739	0.852739	0.469233
MSMEG0034	0.554611	0.00482451	1.23784	9.91731e-06	1.02584	0.728565	0.972858	0.699684	1.1195	0.615606
MSMEG0035	0.658928	0.00942362	1.18681	0.309348	2.00362	5.2341e-05	1.76126	0.00295376	2.0862	1.44146e-05
MSMEG0036	0.762474	0.227585	0.79751	0.0704016	0.412363	0.00146789	0.437169	0.00641539	0.459989	0.00073612
MSMEG0038	1.10259	0.657907	0.813097	0.158785	0.653975	0.0827531	0.716534	0.136126	0.628838	0.0179976
MSMEG0039	0.646231	0.0774189	1.23236	0.00114105	1.43055	5.00399e-05	1.44358	0.000992602	3.1315	0.00724515
MSMEG0040	1.6246	0.0117105	0.905379	0.29563	2.36966	0.00401845	1.64959	0.000300825	2.2894	3.89872e-05
MSMEG0041	1.18548	0.106261	0.941713	0.560444	1.14257	0.297422	1.09443	0.473741	1.26235	0.188102
MSMEG0042	0.676624	0.00120915	1.15236	0.326503	1.01734	0.873805	1.0625	0.410217	0.981864	0.936243
MSMEG0043	1.72774	0.00100442	1.18198	0.000612465	1.69867	0.000254131	1.85954	0.000135465	2.00179	8.27536e-08
MSMEG0044	0.705658	0.158491	1.12446	0.00820113	1.31572	0.000812701	1.24987	0.251835	1.13093	0.229423
MSMEG0045	0.543301	0.00795531	0.842201	0.00318706	0.780073	0.00232351	0.682866	0.12374	0.748275	0.0265101
MSMEG0046	0.461133	0.000955124	1.17608	0.0295248	1.04141	0.351789	1.10191	0.377363	0.877017	0.558489
MSMEG0047	0.852465	0.335753	1.11718	0.34827	1.08038	0.466566	0.920654	0.480855	1.10628	0.517741
MSMEG0048	1.09298	0.328166	0.919609	0.466297	1.27197	0.0374463	1.30347	0.0249553	1.50104	0.0216822
MSMEG0049	0.419681	0.000207885	0.823601	8.6542e-05	0.5604	0.0101157	0.484509	0.00535606	0.677524	0.0410442
MSMEG0050	0.853742	0.490553	0.593813	0.00104393	0.146817	2.78372e-05	0.304149	0.000288697	0.103564	7.35767e-08
MSMEG0051	1.05623	0.710008	1.09548	0.345807	0.894803	0.506929	0.839307	0.461376	0.903974	0.677638
MSMEG0052
MSMEG0053	1.16481	0.424561	1.2528	0.129957	0.790259	0.139029	0.697406	0.0477824	0.744631	0.0472807
MSMEG0054	1.24628	0.193981	1.13131	0.49656	0.66335	0.00096719	0.681782	0.000902131	0.83814	0.407352
MSMEG0055	0.616283	0.0650234	0.998289	0.984225	0.592919	0.000505796	0.554233	1.02831e-05	0.628001	0.0052978
MSMEG0056
MSMEG0057	0.828476	0.306554	1.33996	0.000353541	2.14319	0.0012304	1.65718	2.48809e-07	2.03439	4.48581e-08
MSMEG0058	0.827756	0.317011	0.980009	0.578692	0.729677	0.15786	0.635306	0.0617169	0.613827	0.0937921
MSMEG0059	0.426766	0.000611294	1.07718	0.48637	1.63055	0.0496135	1.45299	0.0609512	1.49531	0.00492839
MSMEG0060	1.30667	0.00133327	0.836061	0.124003	1.16803	0.4418	1.09816	0.57613	1.24214	0.191696
MSMEG0061	1.19544	0.603684	0.941265	0.574757	1.57993	0.00778829	1.71719	0.00882973	1.77223	0.00259711
MSMEG0062	1.02216	0.883998	0.700431	0.00399398	0.761344	0.0501807	0.718114	0.175945	0.791179	0.00619055
MSMEG0063	0.912849	0.110312	0.580224	7.88992e-09	0.917202	0.75049	0.920466	0.285729	1.00813	0.973179
MSMEG0064	0.732303	0.00670757	1.61591	9.00237e-05	0.98716	0.897034	1.26545	0.0987811	1.26361	0.0351025
MSMEG0065	1.29115	0.00825564	1.14545	0.0393063	1.40993	0.0347206	1.57146	0.00341367	1.6081	0.00704174
MSMEG0066	2.69252	0.00103748	1.79735	0.0133356	2.15216	9.24707e-07	2.9214	1.16541e-05	3.32013	1.45855e-06
MSMEG0067	1.07976	0.561633	0.864861	0.295365	0.666721	0.0512561	0.718866	0.214595	0.741804	0.306736
MSMEG0068	0.75082	0.0716592	0.581374	1.00453e-07	0.380927	0.00746939	0.331247	9.84024e-05	0.264745	0.000693539
MSMEG0069	0.988623	0.952011	1.03942	0.748207	0.64798	0.000816227	0.695179	0.0196105	0.619531	0.00527059
MSMEG0070
MSMEG0071
MSMEG0072
MSMEG0073
MSMEG0074	0.785401	0.171703	0.70392	0.00766796	0.356808	0.000197539	0.374029	9.77833e-05	0.430431	0.000458818
MSMEG0075	1.95581	0.000305362	1.41831	0.00726122	1.54303	0.0155068	1.78588	0.000140504	2.35279	2.22515e-06
MSMEG0076	0.721407	0.242165	0.929437	0.170132	0.77635	0.327144	0.776683	0.368129	0.841785	0.0738792
MSMEG0077	1.49991	0.187661	0.916819	0.553939	1.40463	0.205301	1.61155	0.0119222	1.4185	0.1497
MSMEG0078	2.0239	0.000144183	1.20959	0.00104106	0.969234	0.69202	1.01923	0.682519	0.896237	0.0301049
MSMEG0079
MSMEG0080	0.907777	0.546134	0.838444	0.131783	1.1871	0.0357363	1.00259	0.970406	1.19648	0.222343
MSMEG0081	1.48013	0.115139	1.08576	0.486994	1.37198	0.077358	1.60172	0.0552593	1.43373	0.0662701
MSMEG0082	1.86847	0.0936948	1.18456	0.287814	0.896702	0.531308	0.739379	0.305295	1.00297	0.989979
MSMEG0083	0.963378	0.86652	0.955584	0.658792	0.525299	0.00680211	0.632351	0.0416585	0.715076	0.232205
MSMEG0084	0.737749	0.148741	1.22337	0.015791	1.16077	0.417549	1.06995	0.24862	1.26332	0.10136
MSMEG0085	0.741699	0.0459152	1.39035	0.0193843	0.848953	0.0704314	1.01465	0.7873	1.01211	0.893273
MSMEG0086	0.985035	0.953109	0.628818	0.000233944	0.467722	0.0234504	0.383323	0.000466186	0.657396	0.104909
MSMEG0087	1.41357	0.330022	0.806393	0.145489	1.13859	0.15615	0.986829	0.943359	0.836351	0.325077
MSMEG0088	0.374671	1.5924e-05	1.31577	0.00623016	1.408	0.00339368	1.48331	0.000145436	1.60967	7.27252e-05
MSMEG0089	0.513683	0.00448977	1.41005	0.0027336	1.4076	2.44829e-05	1.13757	0.0042718	1.39753	0.0108011
MSMEG0090	1.36817	0.00254773	0.899893	0.20741	0.961828	0.754464	0.816575	0.178345	0.431319	0.00066176
MSMEG0091	1.36037	0.000194706	1.06136	0.690387	0.797546	0.277122	0.840246	0.206062	0.803477	0.072215
MSMEG0092	2.51692	0.0254118	1.13243	0.00888689	0.9077	0.0597371	1.02335	0.901165	0.824296	0.138289
MSMEG0093	0.478741	0.00469464	0.753002	2.00014e-05	0.755497	0.0023449	0.621394	6.4229e-05	0.645242	0.0172235
MSMEG0094	1.09066	0.0742197	0.993043	0.780531	1.17351	0.339907	1.08085	0.729729	1.01315	0.960208
MSMEG0095	0.729127	0.0676111	0.928815	0.16489	1.08215	0.40861	0.945689	0.644107	1.14409	0.322003
MSMEG0096	2.04782	0.0252799	1.42465	0.00011392	1.87681	0.000277682	1.98347	0.00193703	2.1232	1.08777e-05
MSMEG0097	0.936126	0.62213	0.858279	0.0505583	0.833577	0.360319	0.670137	0.0784965	0.724046	0.0520879
MSMEG0098	1.38776	0.10962	0.865812	0.00352842	0.642043	8.82403e-06	0.655583	0.0319574	0.637084	0.0265238
MSMEG0099	0.447798	0.000175991	0.791127	0.00594242	0.763184	0.00067432	0.640945	0.0237021	0.807003	0.0116763
MSMEG0100	1.86348	0.00854821	0.990332	0.932915	1.40954	0.0646634	1.77269	8.66734e-05	1.30785	0.332515
MSMEG0101	0.60857	0.0293475	0.907095	0.423804	1.19672	0.122928	1.32226	0.199351	1.09537	0.578798
MSMEG0102	2.308	0.00432944	1.14454	0.367996	1.39478	0.268175	1.9975	0.059041	1.14627	0.62445
MSMEG0103	1.23222	0.292655	0.804196	0.0373957	1.19759	0.305944	0.945588	0.829935	0.825155	0.501867
MSMEG0104	0.941732	0.557107	1.07364	0.338002	0.921629	0.55641	0.765769	0.0218887	0.7238	0.136258
MSMEG0105	0.59805	0.0208357	1.20879	0.00143709	1.37068	0.0166492	1.43049	0.00460667	1.30149	0.0010553
MSMEG0106	1.21264	0.259253	1.05023	0.0770599	0.99781	0.989744	0.831542	0.358608	0.815101	0.218075
MSMEG0107	1.00941	0.960888	1.02312	0.834118	0.710882	0.0535632	0.85468	0.389451	0.905226	0.513104
MSMEG0108	0.754655	0.291218	1.25845	8.86075e-06	1.63466	8.67429e-05	1.50564	1.83552e-08	1.73419	2.15218e-06
MSMEG0109	1.29441	0.45813	0.770228	0.0847472	0.815384	0.404839	0.709759	0.131389	0.507865	0.028867
MSMEG0110	1.11879	0.491704	0.56335	0.000208324	1.73279	0.0457268	1.17733	0.226251	1.78384	0.0139621
MSMEG0111	0.601479	0.00387519	0.981786	0.90492	0.558071	0.000507723	0.529631	0.000110535	0.621988	0.0133269
MSMEG0112	0.429829	0.003053	0.96724	0.713239	1.55266	3.62491e-05	1.26678	0.000173915	1.52011	5.87915e-06
MSMEG0113	0.814706	0.29793	0.703431	0.000221872	0.65099	0.00628642	0.662342	0.0760655	0.548557	0.0132725
MSMEG0114	1.21416	0.462082	0.588243	2.58917e-07	0.471415	0.0154014	0.527579	0.0201039	0.350972	0.00468098
MSMEG0115	0.958462	0.786795	0.910202	0.275059	0.46859	0.0219211	0.821171	0.360539	0.686552	0.0277951
MSMEG0116	1.37124	0.000215773	1.34741	0.0106634	2.22249	0.0168208	1.6702	4.28381e-05	1.90529	0.000199132
MSMEG0117	2.62773	0.000634961	1.17347	0.00037038	2.15989	6.93839e-06	2.41885	4.51596e-07	2.93834	8.47186e-11
MSMEG0118	0.821089	0.329414	1.48077	0.280074	1.3141	0.00061563	1.2924	0.0264966	1.65174	0.000810041
MSMEG0119	1.05368	0.678467	0.763397	0.00603566	1.19715	0.316261	0.938977	0.803779	0.972434	0.912041
MSMEG0120	0.593494	0.0203684	1.09953	0.0768338	0.924659	0.204735	0.930877	0.200292	1.00087	0.989687
MSMEG0121	1.22556	0.454951	0.931948	0.477259	1.39618	0.217788	0.851403	0.3665	1.31824	0.234449
MSMEG0122	0.820794	0.476017	1.02857	0.807585	0.696697	0.125638	0.773009	0.289228	0.721909	0.110585
MSMEG0123	0.986614	0.957775	1.0385	0.807126	1.25899	0.0115212	1.08506	0.515123	1.11221	0.211265
MSMEG0124	0.744921	0.0484829	0.73009	0.0192014	0.488573	0.0365632	0.727882	0.100888	0.623493	0.0555291
MSMEG0125	1.33562	0.133633	0.568797	0.000701444	0.519398	0.0152713	0.545256	0.0188885	0.732697	0.166105
MSMEG0126	1.73933	0.0190139	1.37372	8.30344e-05	1.4016	0.000618675	1.49608	0.00193628	1.30355	0.000316462
MSMEG0127	1.2232	0.2826	1.45136	0.00418788	2.18698	4.08533e-05	2.1682	0.00351841	2.51167	3.92465e-06
MSMEG0128	1.79365	0.00375129	1.21115	0.0427705	1.49479	0.00992838	1.35384	0.0919075	1.8224	0.0262743
MSMEG0129	1.25706	0.157506	0.826922	0.11836	1.49805	0.0298715	1.18271	0.32792	1.3839	0.00676175
MSMEG0130	2.33409	0.000190311	1.91983	0.000227032	1.08839	0.375774	1.30705	0.0861901	1.1428	0.433985
MSMEG0131	1.17241	0.561474	1.08064	0.26378	0.847354	0.04212	0.78754	0.184508	0.6953	0.0722611
MSMEG0132	0.95764	0.776612	1.19047	0.267692	1.12354	0.557753	1.0963	0.691401	1.12532	0.640282
MSMEG0133	1.37602	0.033482	1.18529	0.251994	0.966423	0.565726	0.854188	0.310598	0.935021	0.65982
MSMEG0134	1.18899	0.495807	1.31897	0.0127129	0.495849	3.77317e-05	0.429648	1.50226e-08	0.447797	0.00334454
MSMEG0135	0.820906	0.238305	1.09314	0.428811	1.06663	0.485949	1.09594	0.324221	1.10674	0.1423
MSMEG0136	0.537629	0.00062728	1.12051	0.130286	0.935954	0.175415	0.911289	0.630478	1.04671	0.536724
MSMEG0137	0.69157	0.0389371	1.09983	0.433338	1.06547	0.432131	0.845227	0.290282	0.63671	0.0199753
MSMEG0138	0.39386	1.16073e-06	0.869976	0.146748	0.932434	0.698636	0.661339	0.0461099	0.763943	0.368843
MSMEG0139	1.43876	0.244133	1.11834	0.232515	0.826666	0.0149157	0.882512	0.245291	0.826534	0.0504359
MSMEG0140	0.730238	0.113652	1.44178	0.00603999	1.14412	0.031669	1.11932	0.489349	1.36284	0.0446051
MSMEG0141	1.10949	0.346312	0.836291	0.00519482	1.19108	0.0186232	1.06344	0.338668	1.45878	0.00106436
MSMEG0142	0.452122	0.0130072	0.682928	8.31527e-05	0.380155	0.012652	0.445155	0.00525901	0.316735	0.000740673
MSMEG0143	2.39949	0.00374242	1.80794	0.00156597	1.1008	0.170566	1.22795	0.367531	1.11265	0.452173
MSMEG0144	0.972042	0.921365	0.636721	0.000110492	0.477705	0.00434465	0.504106	0.0218544	0.54098	0.000205314
MSMEG0145	0.906837	0.420565	1.00222	0.977533	1.33449	0.00076957	1.40478	0.000230885	1.40258	0.00959994
MSMEG0146	2.19638	4.32133e-06	0.952099	0.670596	0.370373	6.01943e-05	0.403599	9.64455e-05	0.394695	0.000133434
MSMEG0147	0.69077	0.0370061	0.966283	0.759311	1.69304	0.00263976	1.69818	0.0223121	1.7995	0.00474673
MSMEG0148	0.870171	0.700421	0.775785	0.0669337	0.567721	0.023057	0.671682	0.0589351	1.34501	0.292927
MSMEG0149	0.742067	0.15132	0.672367	0.000165046	0.703812	0.0872755	0.786265	0.189651	0.736573	0.11726
MSMEG0150	0.798592	0.192553	0.896718	0.393842	0.71342	0.0359338	0.480752	0.00226069	0.580821	0.0195854
MSMEG0151	1.63484	0.000756713	0.972506	0.429375	1.58928	0.00350633	1.62766	0.000213249	2.60151	0.0277579
MSMEG0152	1.78399	0.0434725	0.905013	0.249895	1.12003	0.570952	1.21805	0.235142	1.34277	0.061454
MSMEG0153	0.870507	0.47592	0.926424	0.30364	1.79604	0.00166062	1.59974	0.00485741	1.39628	0.020017
MSMEG0154	1.21966	0.280826	0.805284	0.0591612	1.20346	0.0224458	1.02461	0.919586	1.14536	0.374622
MSMEG0155	0.817085	0.251772	0.810913	0.00316678	1.34544	0.0253581	1.26095	0.208435	1.95133	0.0732186
MSMEG0156	0.939631	0.644122	1.0155	0.839976	0.891386	0.0412732	0.815639	0.281172	0.873409	0.0488165
MSMEG0157	0.538758	1.55915e-05	0.833383	0.0608671	0.343219	1.77143e-05	0.348701	0.000420878	0.382289	3.98636e-06
MSMEG0158	0.991134	0.884465	1.03059	0.720125	1.25982	0.0932111	1.22502	0.444862	1.31433	0.0944498
MSMEG0159	0.801238	0.17376	1.02277	0.78555	0.842844	0.0626017	0.701376	0.0317502	0.820286	0.203355
MSMEG0160	1.14098	0.454799	0.826562	0.267913	0.510399	0.00217047	0.806811	0.443027	0.889717	0.531583
MSMEG0161	2.52216	0.000741489	1.20418	0.108337	2.15247	0.000958032	1.62417	0.0264329	2.51624	7.95015e-06
MSMEG0162	1.78777	0.022546	1.18522	0.00363211	2.60832	0.000258994	1.99382	2.78958e-08	2.92742	2.56112e-06
MSMEG0163	2.50465	0.00502857	1.18601	0.133655	1.65741	0.0111611	1.83045	0.00569847	1.92328	0.00103454
MSMEG0164	0.805586	0.232984	1.10043	0.163233	0.781614	0.166006	0.797315	0.363026	0.474431	0.0140684
MSMEG0165	0.595781	0.0093856	0.58888	0.00260829	0.198482	0.000302389	0.284028	1.5572e-05	0.241806	0.00039361
MSMEG0166	2.10473	0.00330981	1.24441	0.0775829	1.84133	0.0105469	1.89208	0.0190203	1.61003	0.0249808
MSMEG0167	1.29828	0.386643	0.956229	0.731854	1.35173	0.000720232	1.12973	0.476672	1.21001	0.234462
MSMEG0168	1.46349	0.0124626	0.904085	0.313566	1.50349	9.60812e-05	1.51054	0.0235125	1.76305	0.000475783
MSMEG0169	0.916713	0.330551	1.07252	0.0671132	0.810444	0.483567	0.792404	0.457905	0.728359	0.123445
MSMEG0170	0.602782	0.0278126	1.41148	0.00454724	2.21245	4.411e-06	1.85065	1.13893e-08	2.22166	1.68057e-05
MSMEG0171	1.4291	0.0348626	0.833857	0.0700682	1.70993	0.00552288	1.45033	6.73964e-05	1.96235	0.00350058
MSMEG0172	0.700357	0.00121394	1.2771	0.002008	1.12186	0.296895	1.15611	0.275696	1.16919	0.439923
MSMEG0173	1.88279	0.000110315	1.06269	0.399019	1.00117	0.960061	1.09251	0.264649	1.12191	0.47834
MSMEG0174	0.807734	0.0337806	0.796382	0.0255095	0.93172	0.458926	0.787157	0.0815879	0.780307	0.0422555
MSMEG0175	1.01996	0.92402	1.02482	0.727378	1.19807	0.137082	0.892506	0.581179	0.987713	0.918819
MSMEG0176	0.550748	0.00178574	0.751555	0.000226802	0.689033	0.0323891	0.614056	0.146513	0.507697	0.0388798
MSMEG0177	2.20808	0.000132403	1.23488	0.0377425	1.65329	0.0512842	1.72627	0.0096245	1.54982	0.18234
MSMEG0178	1.49575	0.00133987	1.26062	0.0951877	1.51038	0.107579	1.63864	0.02698	1.48716	0.0256168
MSMEG0179	0.476819	0.0144537	0.807006	0.0235975	0.658362	0.036462	0.586542	0.017594	0.549657	0.00487975
MSMEG0180	0.411939	0.000750687	1.04527	0.511558	1.16513	0.00772301	1.22499	0.0755147	1.26863	0.00610297
MSMEG0181	3.17949	0.000103065	1.26786	2.01684e-06	0.784439	0.23471	0.926286	0.606847	0.668263	0.104613
MSMEG0182	1.13253	0.46042	0.861041	0.380533	0.642353	0.145985	0.703642	0.197471	0.723946	0.0819794
MSMEG0183	0.723254	0.0219439	1.05527	0.242788	0.976387	0.807149	0.949207	0.150742	1.05958	0.572816
MSMEG0184
MSMEG0185	0.73268	0.0313002	1.10084	0.577269	0.846857	0.0110579	0.86595	0.189175	0.850001	0.0231847
MSMEG0186	1.41336	0.266664	0.937678	0.561153	1.1757	0.167919	1.20102	0.358043	0.951343	0.741091
MSMEG0187	1.46283	0.0645291	0.827873	0.307322	1.41751	4.45471e-05	1.58583	0.0150906	1.50447	0.0676305
MSMEG0188	0.625258	0.00195307	1.00296	0.974311	1.09073	0.348117	1.20155	0.0789077	0.856736	0.149943
MSMEG0189	1.69881	0.00473097	1.01827	0.694001	1.58589	2.50406e-06	1.38196	0.00122504	1.49534	0.00258924
MSMEG0190	0.91309	0.662596	1.09717	0.302058	0.775445	0.322898	0.882441	0.65259	1.06535	0.805803
MSMEG0191	1.36293	0.00158969	0.718237	0.00892993	1.1349	0.439819	1.07482	0.698149	1.22871	0.110162
MSMEG0192	1.17739	0.0895132	0.909545	0.165861	1.99321	9.09825e-05	1.83705	9.82364e-06	2.93041	1.22295e-06
MSMEG0193
MSMEG0194
MSMEG0195	0.94315	0.783245	1.06751	0.304092	2.5289	0.00119819	2.0425	0.0022395	1.87731	0.0035538
MSMEG0196	1.26781	0.120765	0.908903	0.279714	1.42126	0.00825028	1.43211	0.00532451	1.64785	8.26583e-09
MSMEG0197	0.659462	0.0428366	0.80067	0.0264711	0.636038	0.0227708	0.475619	0.0243112	0.575417	0.0204547
MSMEG0198	1.36973	0.0333493	1.23722	0.000295689	1.37178	0.00189463	1.44954	0.0042138	1.28067	0.0768059
MSMEG0199	0.610038	0.00859369	1.19294	0.000216836	1.18295	0.11995	1.06803	0.556401	1.22522	0.00370121
MSMEG0200	1.39136	0.161955	1.4325	0.130378	0.935396	0.643936	0.989796	0.915454	0.917941	0.579864
MSMEG0201	0.580934	0.00683085	1.24106	8.30076e-05	1.10972	0.0144412	1.16613	0.184605	1.07757	0.420941
MSMEG0202	0.623937	0.204761	1.0026	0.984462	0.738449	0.0658508	0.762559	0.0992126	0.782116	0.0935564
MSMEG0203	1.05089	0.797059	0.877875	0.269455	0.634198	0.000353081	0.537823	0.0107867	0.512628	0.0209039
MSMEG0204	3.0948	0.000187722	1.27715	0.0179971	0.849662	0.0231643	0.909953	0.390285	0.989982	0.963821
MSMEG0205	3.15572	6.89176e-06	1.45699	5.60165e-05	2.16777	7.6088e-05	2.09376	3.48651e-06	2.19677	0.000138814
MSMEG0206	0.831534	0.376218	1.28147	0.00149175	1.12439	0.0207147	1.06068	0.727003	1.12378	0.0657898
MSMEG0207	1.24224	0.257447	0.865238	0.0225004	1.34135	0.342264	1.02788	0.867025	2.09069	0.0411655
MSMEG0208	0.699921	0.000440905	1.16738	0.287465	0.789801	0.00185494	0.611599	0.0799897	0.646518	0.0267962
MSMEG0209	0.757926	0.191091	1.3916	0.00636348	2.17709	0.0167007	2.64098	0.00178808	2.15009	0.00656256
MSMEG0210	1.03661	0.753684	1.32934	4.24697e-06	1.50736	0.000103086	1.58568	3.04186e-06	1.93544	9.92791e-06
MSMEG0211	0.498227	0.00796978	1.13141	0.00713931	0.804662	0.00202354	0.743357	0.023238	0.70774	0.0687271
MSMEG0212	0.791513	0.16967	1.45903	0.000594192	1.23967	0.173671	1.54358	0.000938902	1.45152	3.40339e-05
MSMEG0213	1.44151	0.00388582	1.27055	0.0088392	1.11918	0.341545	1.16123	0.00222327	1.06765	0.460821
MSMEG0214	0.779699	0.000459903	0.834357	0.0462657	0.828592	0.298199	0.899695	0.491706	0.782609	0.30003
MSMEG0215	0.570616	0.00993487	0.905959	0.513706	1.04974	0.804301	0.943341	0.773845	1.06093	0.768115
MSMEG0216	1.12011	0.229512	1.01629	0.730318	1.41685	0.00899387	1.55225	3.51235e-07	1.65647	4.28241e-05
MSMEG0217	0.894201	0.535902	1.20406	0.143177	3.50349	0.00127123	1.98809	3.07166e-08	2.81201	7.3616e-05
MSMEG0218	0.524813	0.000255127	0.833757	0.136854	0.499074	0.022652	0.58265	0.0605416	0.49249	0.0139749
MSMEG0219	1.3806	0.165816	0.930493	0.329379	1.23817	0.0787785	1.14621	0.0416973	1.21693	0.054819
MSMEG0220	0.586945	0.00158965	0.967036	0.764048	0.759657	0.140102	0.733733	0.0694352	0.694214	0.0345224
MSMEG0221	0.783638	0.142398	0.522365	9.3144e-05	0.677854	0.177068	0.527402	0.0221258	0.581225	0.019056
MSMEG0222	3.98487	0.000160625	1.41944	0.013537	2.53698	8.16163e-05	2.28096	0.00113659	2.31552	0.000381953
MSMEG0223	0.799269	0.0346476	1.37373	0.000930197	0.875921	0.337909	1.06874	0.719867	0.957968	0.739985
MSMEG0224	0.844865	0.393172	1.37493	0.00385533	1.25906	0.168534	1.38406	0.173119	1.3915	0.156326
MSMEG0225	0.650496	0.000303049	1.03678	0.651288	0.943848	0.770722	0.933535	0.776039	0.845857	0.580767
MSMEG0226	2.65847	7.90217e-05	1.4942	0.000724982	1.36213	0.247542	1.50119	0.009025	1.60207	0.00656328
MSMEG0228	0.634682	0.00478758	1.0906	0.389838	1.02642	0.625145	1.03245	0.834283	0.883207	0.53078
MSMEG0229	1.03395	0.895989	1.0394	0.532459	1.69259	0.0028043	1.79701	1.06061e-05	1.96466	1.80132e-07
MSMEG0230	0.893435	0.170064	0.854727	0.0158026	0.75215	0.198324	0.906979	0.620897	0.954725	0.711893
MSMEG0231	0.666294	0.000819781	0.993565	0.831213	0.836879	0.00102759	0.74159	0.0200958	0.82399	0.059396
MSMEG0232	1.05944	0.7871	0.91012	0.294984	1.0436	0.806516	0.981763	0.919507	0.834601	0.317024
MSMEG0233	0.624506	0.0285187	1.03908	0.211449	0.930365	0.392149	0.929515	0.21167	1.05006	0.378652
MSMEG0234	0.670724	0.0480234	1.35961	0.010834	1.13358	0.000661104	1.30452	0.0186972	1.19879	0.000604662
MSMEG0235	2.90204	0.00374213	1.66273	0.00670601	1.66796	0.00237404	1.58332	0.118627	1.34944	0.0688017
MSMEG0236	0.594913	0.0200573	0.895092	0.4125	0.943064	0.574802	0.99977	0.998474	0.975095	0.685447
MSMEG0237	1.45121	0.0132206	1.34059	0.00306326	1.1498	0.473094	1.14051	0.000259384	0.928566	0.0547442
MSMEG0238	0.420319	1.03389e-05	0.73986	0.000844442	0.813536	0.095209	0.573757	0.0126699	0.649854	0.0519623
MSMEG0239	2.0858	0.00451141	1.07964	0.106491	1.7875	0.000153178	1.62359	0.00705868	1.40784	0.06308
MSMEG0240	0.780094	0.407131	1.03132	0.617523	0.751828	0.300693	1.03098	0.895264	0.836823	0.465405
MSMEG0241	2.6767	0.000242407	1.42417	2.74533e-06	1.55129	0.0217801	2.05195	0.0115942	2.45433	3.70061e-05
MSMEG0242	1.22698	0.215437	1.84508	6.30803e-06	1.50812	0.000611674	1.58782	0.000457766	2.1504	2.96567e-06
MSMEG0243	0.802568	0.248438	0.82442	0.0142095	0.933284	0.366513	1.18934	0.559208	1.16371	0.248578
MSMEG0244	3.32292	0.00114989	1.39224	0.000191141	2.24884	1.37097e-05	2.18825	5.47082e-09	2.73483	3.94129e-07
MSMEG0245	1.89979	0.00772118	1.09675	0.169317	1.14156	0.421345	1.20429	0.507152	1.46745	0.125425
MSMEG0246	1.11596	0.480871	0.931003	0.619861	0.949027	0.738686	0.907343	0.658947	0.741919	0.0597424
MSMEG0247	0.967848	0.644718	1.18159	0.0582928	1.18735	0.0320824	1.3025	0.050233	1.5348	0.0034312
MSMEG0248	1.8418	2.73059e-06	1.05255	0.206825	1.57062	3.79293e-07	1.54448	0.00148812	1.6556	0.00154023
MSMEG0249	2.03214	0.0025133	1.10778	0.294771	1.67946	0.0288264	1.68073	0.000234362	1.6578	0.0505259
MSMEG0250	1.09609	0.269275	0.666404	0.0226676	0.516602	0.00639312	0.468061	0.0153678	0.564893	0.096941
MSMEG0251	0.433635	8.03987e-06	0.859567	0.0450922	0.75656	0.0456055	0.731623	0.0622595	0.689625	0.0542743
MSMEG0252	0.984979	0.864187	1.01596	0.908119	1.13474	0.222025	0.938895	0.599398	0.912981	0.553963
MSMEG0253	0.545947	0.00276356	0.976906	0.776475	0.65242	0.0564055	0.724688	0.156515	0.855027	0.507526
MSMEG0254	1.13021	0.525013	0.727525	0.0367492	0.417151	0.00126994	0.358085	0.00835234	0.302429	2.53046e-05
MSMEG0255	0.969688	0.840226	1.0293	0.831068	0.565905	0.00393842	0.44746	0.000789126	0.452863	0.00129392
MSMEG0256	0.879938	0.334896	0.726343	0.0485138	1.14603	0.250403	0.975304	0.848406	0.881706	0.339118
MSMEG0257	0.930663	0.649767	1.24554	0.000229712	1.15617	0.0301199	0.93159	0.7581	0.835651	0.375765
MSMEG0258	0.485515	0.0125354	0.9456	0.453823	0.920064	0.203825	0.92211	0.66363	0.973557	0.876077
MSMEG0259	0.731063	0.153473	1.29133	0.0342158	0.846124	0.125748	1.00235	0.991259	0.963582	0.788367
MSMEG0260	1.19028	0.485788	1.0327	0.797751	0.790538	0.206818	0.799408	0.133069	0.716217	0.175793
MSMEG0261	1.5678	0.121817	1.09635	0.158942	1.66067	0.0155706	1.45956	0.000580095	1.41277	0.0609274
MSMEG0262	0.921811	0.65537	0.75503	0.112652	0.784172	0.443803	0.76378	0.0499004	0.615836	0.0385187
MSMEG0263	0.841286	0.153499	1.06762	0.496155	1.27037	0.306934	1.1079	0.328927	1.09975	0.654832
MSMEG0264	1.26251	0.215861	1.03584	0.764058	0.784126	0.00361337	0.715629	0.0226218	0.738086	0.222825
MSMEG0265	1.95013	0.00414876	1.88373	5.05486e-06	1.20224	0.258134	1.30516	0.0990532	1.07702	0.597198
MSMEG0266	0.988544	0.889392	1.01715	0.762655	1.15589	0.0152572	1.04454	0.699757	1.06833	0.62459
MSMEG0267	1.26653	0.0838531	0.903382	0.36526	0.86122	0.471156	0.856111	0.567745	0.861464	0.541439
MSMEG0270	0.686406	9.67522e-05	0.873121	0.181941	0.798964	0.471258	0.549623	0.0223846	0.606784	0.0506527
MSMEG0271	1.64647	0.0162459	0.955504	0.467351	0.749995	3.05972e-06	0.761242	0.00219494	0.689915	0.0618726
MSMEG0272
MSMEG0273	1.0646	0.46161	0.856173	0.173079	1.04158	0.189341	0.967646	0.499305	0.973186	0.84311
MSMEG0274	0.786784	0.217774	0.771342	0.0914379	0.594532	0.0328188	0.482985	0.00218976	0.27727	6.88884e-06
MSMEG0275	0.888912	0.261768	0.789595	0.00760448	1.17539	0.074808	1.15944	0.167304	1.02205	0.782274
MSMEG0276	1.06196	0.430546	1.00135	0.988169	0.701118	0.152074	0.654142	0.0922865	0.653176	0.101049
MSMEG0277	0.631637	0.0210578	1.10425	0.254374	1.20485	0.0900581	1.28959	0.127477	1.35566	0.037934
MSMEG0278	0.55068	0.00109157	1.03806	0.572153	1.2359	0.000382313	1.1349	0.0106852	1.29487	0.00119701
MSMEG0279	1.96146	2.35498e-07	1.08188	0.366746	1.20146	0.41946	1.05238	0.819243	1.04025	0.879424
MSMEG0280	0.731668	0.00231049	1.00623	0.895993	0.635549	0.00626299	0.59432	0.0666835	0.505422	0.00646428
MSMEG0281	0.659509	0.042168	1.23805	0.00358623	1.47187	8.5051e-05	1.42943	0.0152758	1.68827	7.07097e-06
MSMEG0283	0.794267	0.287701	1.08636	0.63097	1.6881	9.47883e-05	1.96013	0.00892701	1.61811	0.035028
MSMEG0284	1.07001	0.676441	1.05146	0.587237	0.990984	0.965081	0.960021	0.835565	0.933373	0.642798
MSMEG0285	0.53434	0.000217104	1.35315	0.0809377	1.48726	0.00451804	1.34827	0.000510631	1.58932	7.8949e-06
MSMEG0286	1.09433	0.715623	0.837651	0.336666	0.783187	0.162531	0.830935	0.515655	1.17625	0.474789
MSMEG0287	1.01872	0.891448	1.12647	0.000665249	1.04237	0.71868	0.950271	0.801885	0.898918	0.552885
MSMEG0288	0.475555	0.0008654	0.549742	2.57465e-06	0.469126	0.00047103	0.28805	9.94569e-06	0.464337	0.01559
MSMEG0289	0.609239	0.0450432	1.08237	0.579422	1.38264	0.040453	1.49327	0.0226349	1.64759	0.0305399
MSMEG0290	0.830755	0.117778	1.11248	0.00446221	1.06941	0.709652	1.07407	0.38184	1.0813	0.564173
MSMEG0291	0.835312	0.380732	0.657051	0.00590145	0.528661	0.0439475	0.418079	0.0116186	0.411788	0.0189722
MSMEG0292	0.823137	0.198083	0.937866	0.123118	0.951308	0.392466	0.847158	0.296444	0.885969	0.260638
MSMEG0293	0.924049	0.430546	0.948936	0.630499	1.24448	0.237222	1.34261	9.92531e-05	1.37935	0.000939423
MSMEG0294	0.656114	0.02135	1.11976	0.372688	1.13251	0.238251	1.1064	0.410987	1.06312	0.611729
MSMEG0295	0.927169	0.186103	1.00232	0.969365	1.15294	0.209322	1.09551	0.189188	1.09463	0.360416
MSMEG0296	1.60701	0.00285743	0.78034	0.107195	0.939032	0.724804	1.28688	0.0515298	5.75725	0.000802602
MSMEG0297	1.15598	0.443086	1.02963	0.876515	1.05538	0.557699	0.917091	0.632431	0.866677	0.46924
MSMEG0298	0.89443	0.437452	1.10837	0.0845767	1.54561	0.00020741	1.51592	0.00842496	1.77511	7.85102e-06
MSMEG0299	1.7787	0.0192203	1.07838	0.495434	1.40868	0.0493562	1.48491	0.159592	1.70552	0.0936304
MSMEG0300
MSMEG0301	0.626949	4.97792e-05	0.996018	0.976856	0.664437	0.0841621	0.705005	0.10592	0.695409	0.0661696
MSMEG0302	0.694117	0.0234195	0.78833	0.0222259	0.533779	0.00158526	0.450666	0.000929008	0.424812	0.00430899
MSMEG0303	2.3528	0.00287135	1.29507	0.062267	1.16496	0.561043	1.68473	0.0377497	1.47505	0.0973046
MSMEG0304	1.07963	0.172708	1.24078	0.00251637	1.34926	0.0473246	1.14813	0.473897	1.18616	0.537242
MSMEG0305	1.84524	0.104763	1.2423	0.236974	1.09723	0.764116	0.949326	0.824501	0.82365	0.463761
MSMEG0306	0.696716	0.00307722	1.00348	0.981446	0.927112	0.0263305	1.02806	0.773734	0.962611	0.630646
MSMEG0307	3.15401	0.00794555	1.2485	0.0234696	1.39481	0.136694	1.07746	0.796533	0.995939	0.982917
MSMEG0308	1.67813	0.00499199	0.758366	0.0153731	1.73748	0.0372236	1.38061	0.230152	1.14529	0.563396
MSMEG0309	1.45973	0.00723203	0.782847	0.000184312	1.14589	0.608485	1.3486	0.273504	1.24336	0.432197
MSMEG0310	0.535774	0.0175398	0.929242	0.347547	0.875859	0.195828	0.85814	0.275828	0.76582	0.0674807
MSMEG0311	0.690535	0.00159656	0.712653	3.06116e-05	0.675005	0.0810038	0.514139	0.0244691	0.559726	0.0422071
MSMEG0312	0.710868	0.0989038	0.506715	2.37699e-07	0.710896	0.0360346	0.656516	0.0134891	0.748328	0.0839107
MSMEG0313	1.48912	0.0027019	1.09516	0.335249	1.30472	0.166018	1.32555	0.037165	1.45471	0.0046237
MSMEG0314
MSMEG0315	0.971854	0.878753	0.728954	0.0677716	0.368192	0.027378	0.51107	0.0188764	0.367484	0.0049808
MSMEG0316	1.30783	0.0240357	0.722337	0.000955322	0.814075	0.329767	0.699187	0.14589	1.00007	0.99981
MSMEG0318	0.85758	0.445923	0.956221	0.413695	1.20435	0.00277549	1.08892	0.272934	1.12828	0.155285
MSMEG0320	1.02764	0.861777	0.978517	0.611035	1.47377	0.00566501	1.40971	0.000423658	1.37924	0.047777
MSMEG0321	0.592268	0.00111008	0.730168	0.0126034	0.851105	0.608884	0.629836	0.0900815	0.554731	0.0247675
MSMEG0322	1.10935	0.478496	1.34107	0.065656	1.31996	5.78061e-05	1.24943	0.000639735	1.33866	0.00210456
MSMEG0323	2.45804	0.00214611	2.20627	0.00277043	1.20379	0.352393	1.37347	0.0339613	1.23838	0.0654795
MSMEG0324	0.330868	9.7397e-05	0.93896	0.579559	1.28337	0.0256335	1.11392	0.576091	1.2206	0.110939
MSMEG0325	0.511745	0.00152113	0.805521	0.0123973	3.02212	0.00399241	1.75698	0.0103224	2.68175	3.20131e-05
MSMEG0326	1.18833	0.0167373	1.52274	2.02574e-06	1.50837	0.0017669	1.74298	0.00408197	1.46496	0.0113195
MSMEG0327	0.794515	0.163365	0.730784	4.44612e-07	0.679689	0.0189337	0.367231	0.0016596	0.493484	0.00633222
MSMEG0328	1.45764	0.00260641	0.762884	9.8441e-05	1.32993	0.00975484	1.264	0.307416	1.59661	0.0468026
MSMEG0329
MSMEG0330	1.10534	0.507193	1.47105	0.00811057	3.57413	0.00150454	2.0215	0.00997496	5.14832	0.00114709
MSMEG0331	0.899538	0.533466	1.19377	0.026505	1.39982	0.00356381	1.35548	0.0428072	1.49272	0.0618242
MSMEG0332	0.653424	0.00206106	1.03859	0.602881	0.800752	0.200347	0.761387	0.0696339	0.826728	0.0800272
MSMEG0333	1.62219	0.00196032	1.14104	0.10129	1.0339	0.832413	0.987997	0.954314	0.805945	0.285247
MSMEG0334	1.02495	0.830599	0.758856	0.000635435	2.27759	0.0121206	1.53113	0.0357961	1.70139	0.00376888
MSMEG0335	1.73223	0.0424318	0.880259	0.465155	1.3284	0.160463	1.204	0.110725	1.06802	0.600838
MSMEG0337	0.962715	0.759467	1.01373	0.787564	1.90916	0.00623109	0.855515	0.300831	1.08592	0.78085
MSMEG0338	1.77438	0.00492279	0.998637	0.989876	1.42226	0.0863444	1.43123	0.00515066	1.82614	0.0611466
MSMEG0339	1.24569	0.214401	0.718757	0.0118949	1.04197	0.695157	0.831273	0.259618	0.840967	0.261143
MSMEG0340	2.28466	0.00277096	1.08639	0.663187	2.4383	6.51515e-05	1.84155	3.01579e-09	2.26601	9.883e-07
MSMEG0341	0.634959	0.00435694	1.04737	0.55983	1.39787	0.000952946	1.22095	0.0687138	1.26425	0.000415721
MSMEG0342	0.930944	0.712284	0.743381	0.0949884	1.19405	0.141336	1.23438	0.12676	1.23632	0.374528
MSMEG0343	0.769687	0.00452115	0.892619	0.0567232	0.873682	0.316687	0.85913	0.0530128	1.07443	0.125137
MSMEG0344	1.00753	0.954364	0.836666	0.212685	0.378844	0.00151508	0.691446	0.0320649	0.561551	0.0407732
MSMEG0345	1.17337	0.479368	0.882156	0.276385	0.998829	0.995288	0.977639	0.881629	0.899083	0.621445
MSMEG0346	0.867943	0.391447	1.16345	0.122982	1.02734	0.800452	1.05705	0.743256	1.06601	0.609879
MSMEG0347	1.29052	0.0851128	0.689028	0.00554655	1.26172	0.134489	1.09287	0.0958645	1.21611	0.00108901
MSMEG0348	0.717378	0.0935991	0.990389	0.79802	1.07567	0.160026	0.879327	0.515433	1.06379	0.595554
MSMEG0349	1.29445	0.0013063	0.939631	0.0834502	1.26165	0.167609	0.93256	0.771922	1.05805	0.746588
MSMEG0350	1.31866	0.0309312	1.19238	0.215556	1.1113	0.477279	1.14335	0.416234	1.1198	0.280259
MSMEG0351	1.37789	0.189993	0.820276	0.433068	0.950349	0.83439	1.01359	0.944894	0.726592	0.186248
MSMEG0352	1.50684	0.195196	1.04706	0.399894	0.353022	0.000488748	0.69619	0.241946	0.445724	0.000622972
MSMEG0353	1.41388	1.48136e-05	0.905101	0.0273892	1.29725	0.0535631	1.34786	0.0494053	1.35221	0.0729917
MSMEG0354	0.693456	0.00627203	1.1978	0.00937138	1.04254	0.641822	1.00743	0.922398	0.965937	0.729827
MSMEG0355	1.47226	0.000332542	0.878193	0.206614	1.17626	0.328287	1.39725	0.0490541	1.58546	0.00604691
MSMEG0356	1.72026	0.0220421	1.4065	0.089495	1.08007	0.631041	0.738312	0.0889873	0.804192	0.415416
MSMEG0358	1.0676	0.419351	0.722583	1.74984e-05	1.03902	0.586454	0.854072	0.330682	1.41828	0.148475
MSMEG0359	2.30767	0.00116994	1.11659	0.136146	0.706863	0.0576489	0.825054	0.0980492	0.744178	0.142175
MSMEG0360	0.664405	0.118127	1.14039	0.35075	0.829378	0.212505	0.816584	0.460112	0.73403	0.0856393
MSMEG0361	0.71576	0.0752737	1.2277	0.0055711	1.23843	0.198893	1.41558	0.174395	1.41542	0.0653608
MSMEG0362	0.696781	0.00968917	1.03557	0.709105	0.890918	0.23472	0.893966	0.371654	0.901218	0.0699675
MSMEG0363	0.645509	0.00027918	0.551277	6.25683e-08	0.569077	0.000138381	0.56316	0.0189954	0.806733	0.415355
MSMEG0364	0.647077	0.000365728	0.721429	0.00274695	0.471099	0.053483	0.491534	0.0341193	0.249251	0.00340799
MSMEG0365	0.493386	0.00143094	0.968662	0.5259	0.700511	3.67464e-05	0.798064	0.350703	0.687415	0.054804
MSMEG0366	1.49629	0.244182	1.33352	0.0188423	1.03923	0.727928	0.978787	0.89904	0.991803	0.955207
MSMEG0367	1.16774	0.402352	1.08104	0.294638	1.18309	0.0243328	1.27093	0.0307687	1.10263	0.66802
MSMEG0368	0.694572	0.1677	1.05254	0.453535	1.44475	0.0103627	1.0047	0.977933	1.58896	0.0443037
MSMEG0369	0.704868	0.0418153	0.686008	0.00543664	0.25984	0.000786235	0.312236	0.000158639	0.269725	0.00175516
MSMEG0370	0.696984	0.000610216	0.679604	0.00202543	0.737065	0.213281	0.649862	0.145346	0.674782	0.194862
MSMEG0371	0.435941	0.00999361	0.735176	0.0118835	0.391208	0.00160453	0.421189	0.00297346	0.45135	0.00465962
MSMEG0372	1.07074	0.761963	0.776439	0.00822817	1.88997	0.000929446	1.56876	3.73263e-06	2.23266	4.49438e-07
MSMEG0373	0.854762	0.405236	1.29373	0.00823341	1.91671	0.000187003	1.92727	0.000199885	2.17362	2.24834e-05
MSMEG0374	2.39574	3.61591e-08	1.13123	0.212677	1.06522	0.794778	1.15168	0.57899	0.914093	0.752539
MSMEG0375	1.72535	0.0103108	1.57659	0.000110365	2.18289	6.84657e-07	2.21542	7.0411e-06	3.12962	0.000751221
MSMEG0376	2.37824	0.000661574	2.01149	0.000100621	1.52136	0.00132144	1.90051	0.000200845	1.93351	5.47168e-05
MSMEG0377	0.434124	8.04468e-05	1.28331	0.0169052	1.09731	0.485831	1.27248	0.360241	1.35115	0.0948011
MSMEG0378	1.57836	0.000103004	1.07916	0.501364	1.90114	1.37271e-07	1.79607	0.000203942	2.34968	1.65694e-05
MSMEG0379	1.04038	0.63279	0.900614	0.0242033	1.15734	0.230706	1.20926	0.0860243	1.45462	0.0677258
MSMEG0380	1.12241	0.301918	2.00165	4.41091e-06	2.15608	1.53131e-06	2.60873	2.77837e-05	2.93209	7.58345e-06
MSMEG0381	0.698505	0.0815222	1.24755	2.7002e-05	1.48663	9.70681e-06	1.51818	0.0492894	1.43592	0.0317692
MSMEG0382	1.4367	0.101005	1.01268	0.87095	1.10757	0.374966	0.797051	0.117212	0.952122	0.732591
MSMEG0383	1.69596	0.0699708	1.33153	1.5055e-06	2.01733	2.36874e-07	2.12763	2.82709e-05	2.66606	6.15978e-07
MSMEG0384	1.91755	2.55736e-07	1.38087	4.51754e-06	2.16341	4.39637e-05	2.49496	1.32657e-08	2.4642	2.46463e-08
MSMEG0385	0.650315	0.0632436	1.05956	0.238916	1.37363	0.000282876	1.28004	0.0056937	1.35818	0.00525603
MSMEG0386	0.708628	0.0944123	0.547116	1.00013e-05	0.499851	0.0534156	0.34086	0.00433543	0.258641	9.90537e-06
MSMEG0387	0.801331	0.125408	1.09801	0.505356	1.5358	0.206896	0.889321	0.479093	1.188	0.415995
MSMEG0388
MSMEG0389
MSMEG0390	0.731932	0.0638074	1.85086	0.000429323	1.87253	5.30312e-05	2.04983	5.49253e-05	2.12977	4.45776e-05
MSMEG0391	2.33158	0.00185393	1.24622	0.00644943	0.938314	0.769462	1.39539	0.0447597	1.40456	0.121237
MSMEG0392	0.957241	0.755918	1.78581	0.000449781	1.71311	3.44971e-09	1.99522	2.025e-05	2.03636	3.51047e-10
MSMEG0393	2.68079	3.04052e-08	1.30677	0.00129018	1.98223	2.41482e-06	2.5584	2.16134e-05	2.87747	1.5278e-08
MSMEG0394	0.8986	0.522351	1.08695	0.357895	1.41959	0.170445	1.16547	0.475219	1.0792	0.264179
MSMEG0395	1.65454	0.0071744	1.18021	0.236218	1.38792	0.00712444	1.69272	0.00172588	1.57375	0.00888753
MSMEG0396	1.97675	0.000191197	2.03574	2.88248e-07	1.85989	3.77295e-05	2.47323	2.93827e-06	2.14748	1.00111e-07
MSMEG0397	0.356736	0.00187791	0.933399	0.584206	1.29236	0.00121575	1.07846	0.492328	1.2938	0.0427812
MSMEG0398	0.764683	0.140842	1.22138	0.00756033	1.28262	0.0106154	1.34777	0.0156569	1.31663	0.0169107
MSMEG0399	0.86108	0.347698	1.05229	0.69021	1.20322	0.0972273	1.17903	0.0214358	1.26248	0.0202448
MSMEG0400	3.4465	1.94788e-06	1.37559	0.00144253	2.61475	7.63275e-09	2.72672	6.1429e-08	3.66688	1.14626e-06
MSMEG0401	1.43147	0.0400472	0.955617	0.649912	1.11683	0.647554	1.07602	0.526068	0.979947	0.886988
MSMEG0402	0.618262	0.00639022	0.930434	0.472033	0.773524	0.0370231	0.707587	0.0424743	0.702076	0.0104501
MSMEG0403	0.440524	3.1546e-05	0.977547	0.61243	0.763364	0.243724	0.788841	0.30485	0.786849	0.367913
MSMEG0404	0.929747	0.288219	0.792255	0.2594	0.29672	0.000225602	0.365146	0.00130122	0.182875	2.48017e-05
MSMEG0405	0.739184	0.117174	1.17537	0.0097397	1.26439	0.0434926	1.37083	0.0031335	1.35619	0.0118573
MSMEG0406	0.749669	0.159064	1.0024	0.977672	1.19295	0.103117	1.13663	0.239178	1.19502	0.369252
MSMEG0407	0.948433	0.908223	0.493455	6.04692e-08	0.23841	0.00126664	0.249636	0.000874636	0.270769	0.00298666
MSMEG0408	0.556375	0.009364	0.926711	0.343572	0.731873	0.0028589	0.579605	0.0170156	0.716444	0.0694943
MSMEG0409	1.35219	0.0138014	0.732203	0.0166705	1.10367	0.365606	1.082	0.654173	1.09794	0.345036
MSMEG0410	0.569821	0.000994367	0.906819	0.0888342	0.841897	0.279377	0.734113	0.169303	0.602782	0.0499768
MSMEG0412	3.11075	0.000755065	1.15493	0.0262659	1.55892	0.00541583	1.63584	0.000211273	1.54444	0.00301463
MSMEG0413	0.502321	0.000535872	0.954606	0.600501	1.23398	0.056363	1.39773	0.116708	1.339	0.00284195
MSMEG0414	1.12836	0.44393	0.815334	0.00657235	0.606193	0.0120625	0.627397	2.26421e-06	0.734529	0.0755989
MSMEG0415	1.00447	0.939711	0.84123	0.186037	1.47864	0.166682	0.756642	0.116891	1.07334	0.819956
MSMEG0416	4.04323	5.42124e-06	4.06468	8.987e-05	2.40127	0.0058426	1.46843	0.000219447	4.46157	2.60006e-05
MSMEG0417	0.532746	0.000583455	0.717046	0.000446568	0.488225	0.000583138	0.519977	0.00216364	0.715458	0.0912827
MSMEG0418	0.652159	0.00627989	0.786742	0.00280946	1.01835	0.875186	1.08475	0.603015	1.07774	0.596472
MSMEG0419	0.491129	1.24464e-05	0.631381	1.40115e-06	0.240192	2.33531e-06	0.385576	0.000492128	0.307393	0.000172575
MSMEG0420	0.589034	0.00656645	0.948618	0.740916	0.586284	3.33648e-05	0.544471	4.53636e-05	0.590657	1.03987e-06
MSMEG0421	1.7382	0.0102957	1.01864	0.822995	1.56896	0.000389812	1.63651	0.00377745	1.84542	1.11512e-06
MSMEG0422
MSMEG0423	0.374187	0.000289755	0.751971	0.0298907	0.571667	0.00828462	0.592286	0.00540493	0.712177	0.012791
MSMEG0424	0.555698	0.00273475	1.0046	0.920078	0.88719	0.0468382	0.849689	0.462909	0.671476	0.0252984
MSMEG0425	0.961617	0.825019	0.802844	0.0158902	0.341026	0.00509316	0.347536	0.0013561	0.201637	1.2083e-05
MSMEG0426	1.7486	0.00012565	1.04689	0.655444	1.55102	0.00360605	1.77838	1.81729e-05	1.83058	3.81464e-08
MSMEG0427	0.708642	0.167407	1.42057	0.00755961	1.63928	5.41223e-07	1.77594	5.762e-05	1.6636	1.15062e-05
MSMEG0428	1.32712	0.0783468	0.91559	0.361887	1.68169	0.0743629	1.09589	0.459435	1.31722	0.134929
MSMEG0429	0.689247	0.0803334	1.00113	0.978227	1.12431	0.0295837	1.05601	0.748557	1.05525	0.6222
MSMEG0430	2.14306	1.00823e-05	1.1384	0.0788288	1.91676	0.000147713	2.1645	1.36716e-05	2.02734	7.74667e-05
MSMEG0431	3.49817	1.16972e-09	1.27687	0.00042847	2.01895	0.00215746	2.24068	0.00133188	2.85136	5.53614e-10
MSMEG0432	1.43778	0.0977033	1.0869	0.654465	0.840119	0.572754	1.18413	0.389057	1.09051	0.776853
MSMEG0433	1.03153	0.44042	1.10749	0.178154	1.02243	0.873091	0.993454	0.94416	1.05314	0.675919
MSMEG0434	0.82158	0.0554779	1.04882	0.460883	0.934741	0.722412	1.00572	0.974922	0.793488	0.317969
MSMEG0435	0.88317	0.505508	1.20111	0.00214795	0.641195	0.023907	0.73417	0.201226	0.699843	0.250315
MSMEG0436	1.14966	0.216456	0.956758	0.303112	1.04786	0.634704	0.898832	0.332867	1.04373	0.638949
MSMEG0437	0.577835	0.00893953	0.832609	0.00147323	0.692242	0.0684378	0.633005	0.0283779	0.542865	0.00024291
MSMEG0438	1.86465	2.12801e-06	0.951788	0.569844	1.4717	0.000173755	1.65411	0.000163207	1.81811	0.000724624
MSMEG0439	0.67516	0.0224074	1.18907	0.0856216	0.822473	0.0014977	0.792129	0.197557	0.764023	0.000557257
MSMEG0440	1.09671	0.624041	0.9523	0.46324	1.08886	0.3567	1.11612	0.0977705	1.30291	0.0118335
MSMEG0441	1.43749	0.00635355	1.36045	0.000753507	1.76895	0.00454171	1.79152	0.000738734	2.00304	9.38711e-06
MSMEG0442	4.85362	0.00422155	2.11497	0.00277409	1.02518	0.908433	1.09674	0.611706	1.03412	0.870447
MSMEG0444	1.33757	0.0179593	1.18556	0.00183536	1.59218	0.000214232	1.69826	1.45945e-07	1.63183	0.00247194
MSMEG0445	1.10615	0.103054	1.10705	0.442781	0.703024	0.00641298	0.713245	0.0416447	0.639775	4.046e-07
MSMEG0446	1.4647	0.310261	1.06623	0.644622	0.713583	0.26979	0.62338	0.039786	0.636713	0.0397431
MSMEG0447	0.913882	0.465455	0.493208	3.89917e-10	0.275055	2.82493e-10	0.30649	2.27083e-08	0.263484	4.43466e-05
MSMEG0448	1.55186	0.0767345	1.28233	3.02883e-05	1.5124	0.00229599	1.41438	0.0264848	1.52454	0.00287766
MSMEG0449	0.747055	0.0849636	1.26612	0.00974087	1.40672	0.00316262	1.44292	0.00834325	1.30924	0.0922524
MSMEG0450	0.566488	0.00289513	0.472147	2.94756e-06	0.667252	0.036631	0.636167	0.00275809	0.666561	0.0673351
MSMEG0451	0.954745	0.747179	0.831433	0.00443466	0.808655	0.34798	1.18915	0.361622	5.25226	0.00037155
MSMEG0452	0.758215	0.0770224	0.660768	0.0024025	0.566177	0.0034674	0.542834	0.000513669	0.647315	0.106874
MSMEG0453	0.940877	0.690151	0.909752	0.0493096	0.851827	0.0495189	0.888518	0.195279	0.87973	0.0755716
MSMEG0454	2.47593	0.00135579	0.920394	0.363919	1.75416	0.00036601	1.88806	0.00104572	1.90934	0.00958773
MSMEG0455	0.973592	0.879128	0.928464	0.356411	0.808211	0.43077	0.739422	0.111969	0.659211	0.0950964
MSMEG0456	1.78492	0.000178357	1.17106	0.000349933	0.977478	0.638331	1.03589	0.803839	0.99001	0.921662
MSMEG0457	0.994374	0.979015	0.840507	0.226282	0.129947	9.86119e-07	0.188527	1.36939e-06	0.183725	8.58752e-08
MSMEG0458	1.42587	4.17564e-06	1.25011	0.124729	1.64447	0.000769354	1.51759	0.0301597	1.32238	0.0398758
MSMEG0459	1.31321	0.167747	0.899264	0.27117	1.42073	0.0160849	1.19328	0.183388	1.50731	0.00476855
MSMEG0460	2.03319	0.0325823	0.996286	0.967786	0.971715	0.84043	1.15792	0.460959	0.895947	0.573417
MSMEG0461	0.909152	0.637278	1.0089	0.908964	1.72736	0.000226139	1.58506	0.0032557	1.94935	0.0091439
MSMEG0462	1.19767	0.484686	0.831622	0.0669735	1.03938	0.770629	0.811329	0.15758	0.71286	0.0896705
MSMEG0463	1.0538	0.629408	0.920884	0.196152	1.07252	0.660674	1.18507	0.324827	0.932917	0.774171
MSMEG0464	2.02709	0.00441778	1.02618	0.837391	1.67504	0.000480691	1.51162	0.00857119	1.76333	0.0157277
MSMEG0465	1.3659	0.0797536	0.949836	0.78451	0.905715	0.422964	0.558096	0.00310881	0.671432	0.0633673
MSMEG0466	0.846302	0.085057	0.968141	0.718707	1.10301	0.404769	1.28072	0.289458	1.40398	0.00754847
MSMEG0467	2.14964	0.000100905	1.04753	0.469213	1.64036	0.00306038	1.62294	0.000217449	1.73769	0.0777504
MSMEG0468	1.13835	0.540421	1.16101	0.149014	0.662683	0.0528519	0.719665	0.0950285	0.567285	0.00914868
MSMEG0469	1.51912	0.0327081	0.908299	0.441324	4.15238	8.0721e-05	1.74343	0.0141817	2.76801	0.0104092
MSMEG0470	0.972645	0.883741	0.788014	0.0154581	1.00624	0.955952	1.19956	0.117326	0.812757	0.27911
MSMEG0471	2.63883	2.15236e-07	1.02131	0.826074	1.93692	1.05536e-07	1.84462	5.38603e-05	1.97978	0.000493266
MSMEG0472	1.12441	0.677967	0.804634	0.0359855	0.867378	0.286946	0.757225	0.25117	0.76121	0.160772
MSMEG0473	0.914558	0.600324	1.21405	0.0610002	1.00323	0.990399	1.07824	0.491206	1.09416	0.161173
MSMEG0474	1.16971	0.256753	0.992522	0.967639	0.504126	7.76226e-08	0.372157	0.000288781	0.589791	0.050282
MSMEG0475	1.73512	0.150839	0.968316	0.846738	1.0301	0.807599	1.10762	0.747647	1.11548	0.629804
MSMEG0476	2.18953	0.000234931	0.854325	0.0262087	1.78204	8.25538e-05	1.74603	0.00112938	2.07813	0.00199303
MSMEG0477	1.25027	0.364089	0.518671	9.74247e-05	0.871628	0.562344	0.555015	0.121544	0.935894	0.822608
MSMEG0478	0.96521	0.831346	1.03109	0.708261	1.59606	8.01545e-05	1.78408	8.67882e-05	1.58891	0.00100225
MSMEG0479	0.68106	0.0238286	1.35766	0.00199891	1.77585	2.58316e-05	1.37894	0.00372964	1.37222	0.0456517
MSMEG0480	0.322142	3.26943e-05	0.498992	3.36964e-08	0.344587	0.00048369	0.310632	0.000221353	0.174812	1.35302e-06
MSMEG0481	0.585536	0.000127062	1.22185	0.0153805	0.819707	0.00117745	0.814159	0.010213	0.849582	0.0100803
MSMEG0482	0.938619	0.748489	1.09192	0.199022	1.20039	0.0568344	1.09048	0.420667	1.17364	0.104985
MSMEG0483	0.99541	0.976143	1.4298	0.00619645	1.02343	0.868249	1.02921	0.830358	1.02036	0.868782
MSMEG0484	0.626107	0.0345325	1.08256	0.426545	0.974314	0.8191	1.05895	0.130507	1.07256	0.41144
MSMEG0485	3.36686	0.00226751	1.22048	0.215468	0.53859	0.000363539	0.785711	0.373145	1.08967	0.80757
MSMEG0487	1.04673	0.809259	1.14521	0.0613054	0.778844	0.253431	0.879441	0.310719	0.877551	0.504677
MSMEG0488	0.830149	0.17924	1.27206	2.37788e-06	1.41736	0.000378604	1.35036	1.45798e-05	1.46649	1.37478e-05
MSMEG0489	0.825171	0.368987	0.969627	0.727068	1.13236	0.338445	1.08965	0.707041	1.32167	0.0137003
MSMEG0490	1.33732	0.0784854	1.12715	0.634153	1.42545	0.00139169	1.28601	0.0366978	1.69429	0.00313663
MSMEG0491	0.922984	0.685224	1.1418	0.00039388	1.32233	0.00467605	1.31023	0.120925	1.4842	0.0318459
MSMEG0492	3.82012	8.56311e-05	0.9446	0.558551	2.03004	2.06791e-05	1.88089	0.00082479	2.86189	5.36929e-09
MSMEG0493	0.873298	0.432772	1.27524	0.211129	1.20266	0.253167	1.17427	0.225585	1.68517	0.10117
MSMEG0494	0.827487	0.00390913	0.771839	0.00300525	2.1062	0.000911933	1.41167	0.00528464	2.5765	0.00135077
MSMEG0495	2.239	0.0037742	0.843581	0.184531	1.80311	9.61138e-06	1.91531	0.00400525	2.50732	9.6097e-06
MSMEG0496	0.998811	0.995676	0.896759	0.39218	0.531272	0.0489094	0.490852	0.027117	0.839711	0.354241
MSMEG0497	1.20074	0.3673	0.719125	0.215801	0.242848	0.000200991	0.483933	0.00405007	0.399097	0.0122941
MSMEG0498	1.01898	0.928062	1.13888	0.368826	1.07314	0.539032	1.03879	0.830011	0.996404	0.97934
MSMEG0499	0.919732	0.433251	1.46373	0.0110037	0.804136	0.00270016	0.876005	0.094193	0.914517	0.254637
MSMEG0500	0.729936	0.0754843	0.743742	0.000956634	0.750591	4.19037e-05	0.648224	0.0613149	1.13487	0.673226
MSMEG0501	1.02013	0.926047	1.16584	0.0256637	1.47707	2.64995e-05	1.42096	0.0327839	1.51142	0.00551852
MSMEG0502	0.623743	0.00306161	0.470859	1.05374e-06	0.48683	0.00106886	0.460408	0.000434016	0.456703	7.33396e-06
MSMEG0503	1.37607	0.0232855	0.937497	0.447641	1.69068	0.023468	1.87789	0.0001619	2.07394	1.81298e-05
MSMEG0504	0.758256	0.0675699	0.810202	0.0543929	0.95233	0.662962	0.788553	0.222662	1.01859	0.880271
MSMEG0505	0.523804	0.00265908	0.866353	0.00487434	0.91201	0.0635449	0.798508	0.0357891	0.969496	0.672187
MSMEG0506	0.546062	0.11158	1.0142	0.91982	1.70616	0.000157259	1.47644	0.148881	1.75783	0.00102263
MSMEG0507	1.29767	0.177963	0.890242	0.0898993	1.31876	0.0466481	1.07642	0.674188	0.909451	0.673041
MSMEG0508	1.11032	0.29069	0.71889	0.00205935	0.967702	0.817731	0.67722	0.115943	0.642362	0.0244393
MSMEG0509	0.560731	0.00349316	0.643617	0.000220452	0.538719	0.000422324	0.416643	0.00343603	0.516776	0.000194486
MSMEG0510	1.6971	0.000207329	1.24291	0.0555246	1.64167	0.0100768	1.59579	0.0166453	1.52434	0.0018856
MSMEG0511	0.599541	0.0026963	1.01082	0.929603	1.12171	0.121891	1.37438	0.300625	1.18568	0.0379512
MSMEG0512	3.47394	0.00363842	2.0745	0.0239193	7.07199	2.35613e-06	4.9125	5.51647e-05	7.19853	2.8066e-07
MSMEG0513	0.721294	0.0566498	0.541568	0.00122361	0.181924	6.03182e-05	0.237912	0.000202887	0.217804	5.5506e-05
MSMEG0514	1.52687	0.0515929	0.909239	0.424342	1.90048	0.0203883	2.20208	0.000474962	2.05704	0.00022247
MSMEG0515	1.43156	0.110823	1.3393	1.20074e-05	1.02338	0.875557	1.08844	0.593056	1.02714	0.885875
MSMEG0516	0.825261	0.25661	1.00163	0.988013	0.43037	0.00435056	0.462387	0.00443698	0.306372	3.38927e-07
MSMEG0517	0.916997	0.61546	0.675786	0.0157925	0.79904	0.36463	0.617411	0.0454851	0.690959	0.0266609
MSMEG0518	1.17712	0.440064	1.07648	0.275521	1.19461	0.347308	1.52873	0.0361777	1.52052	0.160972
MSMEG0519	2.61127	0.000105381	0.900612	0.446395	1.92136	1.20562e-05	1.98774	8.13798e-06	2.62005	3.25581e-08
MSMEG0520	1.65586	0.00416304	0.994899	0.958471	2.51327	0.000346575	2.48068	0.00320758	2.29117	4.13418e-08
MSMEG0521	1.35551	0.140629	0.899395	0.285733	1.34104	0.146529	1.52178	0.0230534	1.33432	0.341386
MSMEG0522	0.964922	0.648279	0.619074	1.60366e-07	0.655921	0.0404913	0.608366	0.000282997	0.785464	0.286748
MSMEG0523	0.469617	0.000427771	0.669775	0.00360917	0.853709	0.460863	0.597035	0.00386456	0.749224	0.047221
MSMEG0524	1.36035	0.0200429	1.26531	0.0313727	1.78636	0.00102534	1.61952	0.0270541	1.33421	0.078647
MSMEG0525	0.698803	0.15642	1.55299	4.56019e-06	1.79636	8.77158e-06	2.02701	3.94971e-05	1.69631	0.0334235
MSMEG0526	1.99468	0.00153866	1.39021	0.0260793	1.82897	0.000648191	2.14234	1.08423e-05	1.99384	1.00384e-06
MSMEG0528	1.55169	0.000860972	2.23262	7.40645e-09	2.07025	1.48943e-05	2.68176	1.75683e-08	2.1739	3.63747e-06
MSMEG0529	1.66042	0.0030503	1.48244	0.000127372	1.74928	0.00521067	1.6519	0.00553002	1.4198	0.00583242
MSMEG0530	1.43637	0.153145	1.46156	0.000223983	1.20709	0.00206853	1.48232	0.000773697	1.22929	0.0115895
MSMEG0531	0.573129	7.65107e-05	1.04928	0.387675	0.787781	0.0757231	0.886004	0.348216	0.790033	0.0940707
MSMEG0532	1.46077	0.232686	0.698056	0.028232	0.304239	0.00119461	0.32977	0.000726453	0.410439	0.00432752
MSMEG0533	0.648595	0.0233094	0.951695	0.37986	0.81341	0.253526	0.711337	0.137558	0.655615	0.0258588
MSMEG0534	1.31098	0.0119291	1.12296	0.279331	1.31067	0.370847	1.12855	0.684413	2.83908	0.0107131
MSMEG0535	0.693006	0.0170312	0.994918	0.934526	1.3553	0.00145092	1.36832	0.0638094	1.35367	0.038495
MSMEG0536	1.78318	0.000991587	1.1846	0.0250893	1.09809	0.338772	1.15004	0.0725018	1.13577	0.0243445
MSMEG0537	0.833281	0.164331	1.30872	0.000147215	1.54168	8.41242e-05	1.75849	0.000345921	1.94006	0.000366339
MSMEG0538	0.555491	0.00255037	1.02025	0.635358	1.02907	0.358535	0.872517	0.340301	0.942058	0.64593
MSMEG0539
MSMEG0540	1.26132	0.0195723	0.911507	0.226364	0.705975	0.00444307	0.793073	0.00095756	0.685443	0.00547823
MSMEG0541	1.06891	0.79885	0.939451	0.532765	1.38741	0.0299373	1.70723	0.0170175	1.76782	9.533e-07
MSMEG0542	2.14579	1.69271e-06	1.17708	0.000666355	1.98645	6.79517e-07	1.95707	2.68343e-05	4.17855	0.00269985
MSMEG0543	1.43789	0.0665626	0.804952	4.20452e-07	1.08326	0.663214	1.18445	0.129494	1.48759	0.179721
MSMEG0544	0.512117	3.32472e-05	0.975064	0.769612	1.0269	0.804646	0.904538	0.426148	1.01235	0.913386
MSMEG0545	0.514234	0.00565421	1.05617	0.404534	1.22473	0.371258	1.0314	0.868832	1.22823	0.534095
MSMEG0546	1.2416	0.250679	0.999021	0.991834	3.00004	0.00034894	2.00484	0.0108185	2.75628	4.92475e-05
MSMEG0547	0.860368	0.372977	1.36362	0.00960212	0.66689	0.00020145	0.803057	0.0826015	0.772794	0.00450124
MSMEG0548	4.83374	8.62754e-05	4.04784	3.94358e-05	4.06652	3.09509e-06	5.50665	3.87304e-07	4.82772	1.93048e-06
MSMEG0549	1.11259	0.499027	1.72709	1.05742e-05	1.31043	0.00260732	1.39401	0.0090871	1.27252	0.24604
MSMEG0550	3.5881	0.00274516	1.68742	4.03677e-05	0.937313	0.734113	1.95556	0.0143957	1.19503	0.338922
MSMEG0551	1.76063	0.00202502	1.29007	0.0282002	1.74308	0.000813428	1.77916	0.000646298	1.79258	0.00416374
MSMEG0552	0.807016	0.367463	1.1703	0.000773155	2.02294	0.00255989	1.60641	0.000980998	1.54554	0.00764529
MSMEG0553	1.26096	0.177531	1.02255	0.562603	1.33552	0.0530326	1.28883	0.261889	1.08295	0.7007
MSMEG0554	0.680927	0.10694	1.17185	0.0778503	0.825422	0.17957	1.0839	0.577503	1.03827	0.744444
MSMEG0555	1.40729	0.0272931	0.9056	0.125451	1.87278	0.00198675	1.59169	0.0290459	1.86548	3.22851e-05
MSMEG0556	1.20707	0.347212	1.13976	0.0547477	1.21143	0.0025633	1.09745	0.135101	1.06362	0.681648
MSMEG0557	1.52673	0.0132506	0.839379	0.182247	1.20898	0.24925	1.13701	0.436478	1.02745	0.895285
MSMEG0558	1.13593	0.666893	1.38033	0.00107547	1.76108	0.00101192	1.46066	0.0267257	1.66514	0.0248666
MSMEG0559	1.00823	0.96732	1.18711	0.00533388	1.21833	0.372254	1.27713	0.33673	0.988892	0.96171
MSMEG0560	0.571934	0.00310739	1.21214	0.00543837	1.40554	0.0354474	1.05125	0.729236	1.19552	0.186953
MSMEG0561	1.30175	0.269418	1.1667	0.116445	1.75627	5.58777e-07	1.58692	0.00563172	1.65022	2.37326e-05
MSMEG0562	0.750448	0.210201	0.97684	0.873125	1.25431	0.44613	1.06533	0.601954	1.87753	0.0554778
MSMEG0563	0.884319	0.0721735	0.887485	0.168162	1.1351	0.310659	1.22356	0.047917	1.29438	0.177083
MSMEG0564	1.00102	0.994796	1.00831	0.931682	1.26322	0.0136957	1.26647	0.0357843	1.26296	0.0319903
MSMEG0565	0.482063	0.00727014	1.15793	0.483745	0.911834	0.223248	0.763032	0.111568	0.719698	0.0706577
MSMEG0566	0.813229	0.18471	0.62864	0.0101761	0.314663	0.00145989	0.35894	8.86291e-05	0.223187	0.000183241
MSMEG0567	1.17825	0.557441	0.973561	0.653043	1.1311	0.42437	1.25659	0.40785	1.29948	0.19205
MSMEG0568	1.06236	0.718021	0.851831	0.00643634	1.83904	0.0196287	1.43797	0.0954746	2.17838	0.00490711
MSMEG0569	1.72163	0.00157802	0.895856	0.189158	1.46791	0.00204121	1.41568	0.00171768	1.45323	3.50963e-05
MSMEG0570	0.861112	0.392261	1.11161	0.0592096	1.32364	0.0210843	1.51921	0.0108945	1.59589	0.00944765
MSMEG0571	0.897109	0.578386	1.04029	0.645319	5.03079	0.00178544	3.55105	0.00141635	4.4731	0.000305198
MSMEG0572	0.92049	0.659101	0.61025	0.00134335	0.670359	0.226026	0.617892	0.13298	0.574286	0.00749628
MSMEG0573	1.95407	0.040147	1.17222	0.343935	1.95213	0.000113319	1.67287	0.00459208	1.56874	0.00664237
MSMEG0574	0.751392	0.372633	0.737544	0.0692415	0.47769	0.0955244	0.600546	0.0868264	0.339563	0.00220232
MSMEG0575	1.17382	0.489073	0.938496	0.716582	0.767528	0.212247	0.775324	0.0979948	0.745997	0.0140502
MSMEG0576	1.24731	0.401317	1.18466	0.168007	0.635197	0.00997042	1.09735	0.439125	0.717349	0.248776
MSMEG0577	0.581659	0.000591916	0.845683	0.246654	0.433087	0.0135773	0.414377	0.00106294	0.436109	0.00109211
MSMEG0578	1.17666	0.385549	1.209	0.339184	0.684103	2.26936e-06	0.63564	2.8463e-07	0.54409	0.017726
MSMEG0579	0.980274	0.942124	1.07966	0.0298366	1.15501	0.0409572	1.20546	0.00908811	1.26778	0.018416
MSMEG0580	0.931293	0.451989	0.898823	0.383159	1.07034	0.255963	1.03007	0.767243	0.847996	0.373959
MSMEG0581	0.669441	0.0267802	0.789641	0.0743866	0.790369	0.161149	0.775717	0.308319	0.90832	0.436908
MSMEG0582	0.679657	0.0462873	0.721969	0.00216916	0.856468	0.0276189	0.705158	0.0246665	0.745148	0.0415013
MSMEG0583	1.05607	0.528659	1.20626	0.00719207	1.2055	0.0714471	1.34914	0.000139531	1.07445	0.515611
MSMEG0584	0.627389	0.0866104	0.853286	0.222668	0.493455	1.7832e-06	0.498506	0.000189136	0.55544	0.00118369
MSMEG0585	0.837827	0.214863	0.839819	0.00414451	0.828017	0.0939259	0.901013	0.640525	0.882747	0.554903
MSMEG0586	0.964553	0.710014	1.15379	0.000298963	1.02959	0.76099	1.17937	0.13816	0.965633	0.870262
MSMEG0587	0.632607	0.0397768	0.91081	0.47083	0.809156	0.105485	0.872815	0.2151	0.713148	0.0545451
MSMEG0589	2.11254	0.000415873	0.864244	0.00359053	3.76538	6.34136e-06	2.65839	0.000304054	4.41912	1.12367e-06
MSMEG0590	0.929514	0.623911	0.998758	0.984073	0.945919	0.819847	0.958443	0.828589	0.986651	0.930801
MSMEG0591	0.41781	0.00265244	0.721526	5.49953e-05	0.291972	0.00112062	0.444272	0.00101363	0.367259	0.00183996
MSMEG0592	1.57231	1.62594e-05	1.5198	5.35975e-06	1.53553	0.000508389	1.62176	0.0149823	1.53682	0.0194622
MSMEG0593	2.07626	0.00038187	1.26913	0.000694749	1.18644	0.255062	1.24297	0.157947	1.30853	0.0325012
MSMEG0594	1.71631	0.0112199	1.08221	0.545654	0.902017	0.141801	0.930738	0.470333	0.919957	0.488263
MSMEG0595	0.668435	0.0747518	0.99746	0.948274	0.992287	0.924756	0.753908	0.248568	0.811189	0.318341
MSMEG0596	0.813042	0.118309	1.10752	0.22959	1.03832	0.221135	1.0187	0.881057	0.83994	0.529192
MSMEG0597	0.974026	0.843998	1.5029	0.0017878	1.94391	0.000214397	1.851	4.02835e-09	2.04835	7.38678e-06
MSMEG0598	0.523911	0.00163994	1.45565	0.0212119	2.12024	7.30012e-06	1.95617	5.62094e-05	2.65016	2.82277e-06
MSMEG0599	0.833568	0.365303	0.722392	7.03283e-05	0.465307	0.000485275	0.44648	6.25258e-05	0.402054	0.00946626
MSMEG0600	0.965405	0.521327	0.892917	0.0481809	0.508539	0.00685359	0.514676	0.0222033	0.541967	0.0515579
MSMEG0601	0.355911	0.00122722	0.842646	0.0755122	0.672198	0.000879289	0.635722	0.0195039	0.888032	0.512765
MSMEG0602	1.02666	0.828303	0.715704	0.000144068	2.12204	0.0104738	1.18383	0.370741	1.63232	0.0925345
MSMEG0603	1.44512	0.043742	1.47913	0.0203156	0.816204	0.0496718	0.940676	0.67753	0.943902	0.705688
MSMEG0604	0.959537	0.835237	1.0613	0.527113	0.812326	0.354059	1.08838	0.803978	0.38574	0.00104069
MSMEG0605	1.79237	0.00574955	1.24669	0.000396375	1.78995	1.52939e-06	1.96923	3.59027e-06	2.14092	1.97054e-06
MSMEG0606	0.638211	0.0320272	1.31965	0.0135959	1.08377	0.681825	2.27337	0.0299796	1.34651	0.0291142
MSMEG0607	0.979191	0.89872	1.01843	0.853015	0.821385	0.125446	0.891858	0.121823	1.00923	0.976139
MSMEG0608	2.38782	0.00696447	1.51697	0.00128738	0.91365	0.647846	1.23339	0.338341	0.768987	0.311224
MSMEG0609	0.829477	0.402797	0.827243	0.0017862	0.747503	0.00400683	0.446457	0.00187716	0.515778	0.00925165
MSMEG0610	1.56592	0.02894	0.967078	0.268962	1.24003	0.478439	1.15781	0.288566	1.57926	0.00831195
MSMEG0611	0.794266	0.39999	0.590161	9.53406e-05	0.539316	0.0141293	0.552779	0.0533358	0.606445	0.0392568
MSMEG0613	0.625332	0.0768374	0.829636	0.0697919	0.958689	0.286436	0.968131	0.840698	1.07621	0.589868
MSMEG0614	0.882963	0.471135	0.980045	0.833003	0.51407	0.0367491	0.920705	0.727049	0.647745	0.0859613
MSMEG0615	0.80211	0.309659	1.06502	0.472212	0.868455	0.382367	0.706518	0.0637522	0.931295	0.533807
MSMEG0616	0.924628	0.662297	1.19173	0.170276	1.24231	6.99737e-05	1.11159	0.227477	1.06782	0.496987
MSMEG0617	0.888892	0.186246	1.18482	0.131491	2.93981	0.000707632	2.45261	0.00030355	2.21884	1.47905e-05
MSMEG0618	1.71465	4.07657e-05	0.984725	0.726565	1.77353	5.00771e-07	1.39956	0.142671	1.55561	0.0438438
MSMEG0619	0.804227	0.114246	1.93607	0.0709434	1.33924	0.000131982	1.22283	0.0773966	1.24996	0.138706
MSMEG0620	0.550861	0.000390577	1.05135	0.403199	1.25441	0.000675097	1.16034	0.125125	1.1512	0.104868
MSMEG0621	0.479724	0.00565578	0.893513	0.203696	0.791911	0.00512151	0.738831	0.00027015	0.722621	0.00220348
MSMEG0622	1.45275	0.0259038	1.04336	0.597471	0.882344	0.0838514	0.950057	0.503389	0.864015	0.168332
MSMEG0623	0.706705	0.141652	0.68832	0.00194368	0.525486	0.00131132	0.442922	0.000171057	0.536314	0.00709769
MSMEG0624	0.850488	0.270249	1.03224	0.640847	0.945165	0.401007	0.858656	0.338617	0.821945	0.0927394
MSMEG0625	4.12398	0.000140295	2.64646	0.000684603	1.81494	0.00184749	1.81244	0.000468701	1.73521	0.00140381
MSMEG0626	0.736348	0.0706378	0.934058	0.256168	0.90632	0.603907	1.07803	0.82031	1.60249	0.0253842
MSMEG0627	0.341339	3.26768e-06	0.743166	3.25486e-05	0.469008	0.00592337	0.4906	0.016754	0.287127	0.000174258
MSMEG0628	0.71057	0.217869	0.730483	0.00476203	1.01409	0.929636	0.972278	0.889673	1.2287	0.2935
MSMEG0629	1.14881	0.439863	0.894027	0.37721	1.07466	0.563299	1.05068	0.676715	1.14472	0.035768
MSMEG0631	1.92537	0.0205856	1.27109	0.05074	0.707857	0.0115713	0.673439	0.0220059	0.510095	0.00516086
MSMEG0632	1.5223	0.17023	1.19107	0.20782	0.701004	0.141049	0.823832	0.360015	0.695296	0.249978
MSMEG0633	6.60524	1.42713e-05	2.83972	1.46581e-07	4.17874	3.68318e-05	4.06194	0.00010904	4.50614	1.10991e-08
MSMEG0634	1.8952	0.0215356	2.73894	0.00054015	4.68339	8.38597e-07	5.1995	9.95401e-08	5.05656	1.9356e-05
MSMEG0635	1.75248	0.0198315	1.64069	0.00115701	2.614	0.000145135	3.08025	2.08262e-06	2.85348	8.50323e-07
MSMEG0636	0.834101	0.0344059	0.818417	0.106135	0.676626	0.0132467	0.750541	0.166491	0.697112	0.0174721
MSMEG0637	0.925533	0.751815	0.978216	0.690749	0.922698	0.0906656	0.808893	0.259671	0.828316	0.460009
MSMEG0638	0.727013	0.119905	1.21666	0.0024522	1.49916	0.0770388	1.30234	0.191342	1.40274	0.00957563
MSMEG0639	1.15288	0.000949205	0.993767	0.861386	1.16984	0.403655	1.33616	0.20714	0.818297	0.410589
MSMEG0640	1.00369	0.972405	0.654799	6.65377e-06	0.85596	0.135388	0.652793	0.0120012	1.20729	0.560279
MSMEG0641	0.925219	0.575312	1.05378	0.61476	1.15961	0.362313	1.24963	0.0892847	1.16126	0.362409
MSMEG0642	1.46581	0.0775119	1.01572	0.901224	0.812705	0.000443349	0.801289	0.0395347	0.730653	1.08218e-05
MSMEG0643	1.64796	0.0721811	1.18411	0.0873802	1.7742	1.68584e-05	1.98672	0.000371235	1.63362	0.000831059
MSMEG0644	3.22862	0.000196453	1.32075	0.0209185	2.00791	0.000602237	2.15423	2.96648e-06	2.08132	3.52247e-05
MSMEG0645	0.671721	0.0615418	1.22761	0.00948595	1.11876	0.106	0.905863	0.522145	1.06955	0.740744
MSMEG0646	0.612141	0.0119964	0.885012	0.0108807	0.435101	0.00155175	0.381428	0.00124637	0.466402	0.000417862
MSMEG0647	0.735483	0.0201677	1.00715	0.860535	0.737959	0.00213051	0.854634	0.122059	0.815994	0.196952
MSMEG0648	0.452558	0.0250329	0.717544	0.0417415	0.510409	4.92172e-05	0.441174	0.000391466	0.446789	3.89742e-05
MSMEG0649	2.05367	0.00414133	0.905259	0.181339	1.47456	1.73044e-05	1.13262	0.496028	1.04537	0.817703
MSMEG0650	0.974689	0.853346	0.796745	0.0489702	0.954303	0.737083	0.892176	0.473457	0.78128	0.0927202
MSMEG0651	0.688599	0.00712415	0.665127	0.00143676	0.821742	0.230314	0.867718	0.404637	0.699528	0.179016
MSMEG0652	1.97753	0.000558444	1.32182	0.000323616	1.68788	9.62535e-05	1.87411	0.0136001	1.99208	2.71231e-05
MSMEG0653	0.681834	0.0427054	0.875161	0.309812	1.1291	0.524826	1.49411	0.0720426	1.30125	0.0996202
MSMEG0654	1.77781	0.131205	1.17632	0.295749	1.03464	0.677494	1.05861	0.665936	0.939732	0.83405
MSMEG0655	1.85843	0.0100894	0.790145	0.215355	0.97743	0.931828	1.14581	0.599501	1.24444	0.347949
MSMEG0656	0.744709	0.0473391	0.679981	0.00105631	0.472774	0.0177587	0.607612	0.107845	0.434137	0.0041828
MSMEG0657	0.848929	0.371107	0.451158	2.09934e-09	0.882479	0.692139	0.846721	0.510981	0.646798	0.0458718
MSMEG0658	0.696202	0.0834272	1.06437	0.651834	0.856743	0.226776	0.923483	0.734372	1.0466	0.867567
MSMEG0659	2.38579	0.0111584	1.0916	0.709622	0.534866	0.138477	0.753405	0.215393	0.243022	7.76784e-06
MSMEG0660	1.46677	0.0451121	0.816935	0.0448459	1.13735	0.501266	1.15598	0.418614	0.866892	0.507549
MSMEG0662	1.65928	0.0372462	0.98239	0.866512	0.53739	0.0021171	0.412751	0.00104059	0.515535	0.0341821
MSMEG0663	0.80152	0.28903	1.59838	4.96921e-11	1.22173	0.00347405	1.40075	0.0399525	1.21276	0.0161253
MSMEG0664	1.2665	0.148737	1.00547	0.949545	1.17685	0.46991	1.18677	0.342031	1.22643	0.133214
MSMEG0665	1.5708	0.0176104	0.751818	0.0166696	1.05648	0.861928	0.962826	0.880506	1.06648	0.811164
MSMEG0666	0.366128	5.4841e-05	0.916616	0.349177	1.43792	3.68085e-06	1.28713	7.58674e-07	1.27091	7.34827e-05
MSMEG0667	1.99805	7.39731e-05	0.885091	0.00698602	5.93644	0.00045721	1.81815	0.00117376	2.96486	2.83208e-06
MSMEG0668	1.28029	0.231194	0.719082	0.0151807	0.631048	0.157497	0.550876	0.0826714	0.407261	0.0161333
MSMEG0670	0.667674	0.0175524	1.07684	0.444238	0.877431	0.175314	0.862502	0.377994	1.00641	0.963633
MSMEG0671	0.921585	0.690896	0.921109	0.71976	0.376959	6.50341e-05	0.198002	6.93882e-06	0.443999	0.0046151
MSMEG0672	1.44916	0.00287515	1.34539	0.0191673	1.43833	0.0149318	1.50183	0.000445503	1.40313	0.0128763
MSMEG0673	1.17219	0.219553	0.91588	0.258369	1.09969	0.612274	1.03897	0.813647	1.08642	0.443184
MSMEG0674	1.02507	0.931352	0.882441	0.267469	0.842328	0.0400676	0.71197	0.0288739	0.669495	0.0102768
MSMEG0675	1.74944	0.0228504	1.15052	0.0792866	1.60377	0.0997292	1.40939	0.0605638	1.32686	0.0342664
MSMEG0676	0.996711	0.982944	0.797356	0.162535	0.658035	0.083495	0.596484	0.0575166	0.594911	0.113637
MSMEG0677	1.56786	0.0490626	0.968936	0.407327	0.85905	0.151264	0.885528	0.288471	0.827984	0.0719195
MSMEG0678	1.0589	0.641522	1.08629	0.414496	1.27997	0.000101998	1.24092	0.29281	1.26137	0.137082
MSMEG0679	1.61441	6.92533e-06	1.06992	0.251551	1.4346	4.65594e-05	1.48491	1.91344e-05	1.75366	4.07837e-05
MSMEG0680	1.28292	0.134166	1.38738	0.013545	1.70501	0.000989415	3.32438	0.00127447	2.39446	0.000195413
MSMEG0681	0.714466	0.105129	1.09694	0.452243	2.87144	0.0119037	1.71088	0.021875	1.43632	0.0396385
MSMEG0682	1.2653	0.11244	0.89909	0.082644	1.06431	0.692604	1.07207	0.739019	0.967032	0.863678
MSMEG0683	2.02256	2.14468e-07	1.04149	0.607874	1.88411	0.00410585	2.09041	0.000220504	2.19747	0.00153137
MSMEG0684	0.833681	0.320298	1.1933	0.223688	0.882738	0.0787608	0.783515	0.11231	0.819077	0.0318952
MSMEG0685	1.4985	0.00514244	1.11552	0.350073	1.35386	0.000154792	1.60348	0.00294577	1.3436	0.0385924
MSMEG0686	0.672922	0.00753344	1.18704	0.0673532	1.31492	0.000143734	1.32588	0.000160085	1.3455	0.00125851
MSMEG0687	0.454917	0.00549541	0.70012	0.000666212	0.594772	0.0109191	0.533986	0.00388309	0.529988	0.000135371
MSMEG0688
MSMEG0689	0.584231	0.00106569	0.822027	0.030152	0.262638	0.000199015	0.243791	7.61668e-07	0.297959	7.02256e-05
MSMEG0690	0.816936	0.0404049	1.24451	0.170276	0.619379	0.0122624	0.571978	0.00317802	0.559499	0.00282639
MSMEG0691	1.08121	0.675658	1.07457	0.46119	0.854567	0.00541677	0.989545	0.929871	1.85081	0.128101
MSMEG0692	1.97682	0.0404733	1.02272	0.921299	1.13644	0.463181	0.9276	0.677938	0.891852	0.718927
MSMEG0693	0.940346	0.743977	0.937789	0.681192	0.946795	0.630077	0.90002	0.237691	0.884572	0.431989
MSMEG0694	0.983461	0.93779	1.20896	1.20105e-05	0.961901	0.791586	1.12577	0.15345	0.837548	0.510842
MSMEG0695	2.37227	0.0178092	1.47201	0.00320668	1.92492	0.00387965	1.97605	0.0143612	1.38681	0.0612249
MSMEG0696	0.638541	0.0184694	0.940115	0.165999	0.445669	0.000930116	0.473757	0.00189189	0.530369	0.0157492
MSMEG0697	1.82552	0.0292695	1.65836	0.0893231	1.86388	0.00766377	2.45574	2.86647e-06	2.37038	5.65856e-08
MSMEG0698	0.448264	0.000340516	0.831364	0.140438	0.742149	0.197385	0.653064	0.12294	0.708072	0.0830413
MSMEG0699	0.53371	0.00253282	0.977619	0.858365	2.29915	0.00011257	1.82433	1.19247e-05	2.22174	6.84268e-06
MSMEG0700	2.08269	0.0011097	0.80655	0.0861192	1.66228	0.00057213	1.52276	0.06	1.85127	0.00170508
MSMEG0702	0.869766	0.334261	0.576337	8.98044e-07	0.661937	0.0653532	0.572591	0.0515881	0.506133	0.0133763
MSMEG0703	0.87647	0.22275	1.05734	0.489516	1.10642	0.608847	1.28423	0.186217	1.28707	0.123241
MSMEG0704	1.46616	0.0325264	1.04494	0.0429383	0.750889	0.000396917	0.877352	0.383819	0.673319	0.00285662
MSMEG0705	0.78817	0.0179388	1.31223	0.000689236	0.692762	6.56738e-05	0.763821	0.000236125	0.660177	0.000934234
MSMEG0706	0.570585	0.000576415	1.42573	8.40726e-10	1.45389	0.002207	1.24102	0.274083	0.831711	0.373554
MSMEG0707	0.697774	0.083518	1.11066	0.042698	0.996351	0.951851	0.854952	0.324983	0.835079	0.0961658
MSMEG0708	1.99014	0.00224381	1.2573	4.54031e-06	1.10486	0.389088	1.11723	0.00618439	1.07302	0.499289
MSMEG0709	1.22831	0.290558	0.942285	0.735623	0.803847	0.198935	0.815908	0.380987	0.712785	0.0029964
MSMEG0710
MSMEG0711	0.788769	0.0964333	1.25294	0.0270547	1.63708	0.00119268	1.74778	0.000391144	1.95348	6.16389e-06
MSMEG0712	0.466245	0.00479877	0.864351	0.0207641	0.896105	0.238819	0.712774	0.0817705	0.787703	0.12244
MSMEG0713	1.24584	0.161094	1.46093	2.86505e-08	2.02992	0.00992804	1.73615	0.000444487	1.67015	0.000263391
MSMEG0714	0.894928	0.0919809	0.923545	0.609545	0.831928	0.105347	0.638105	0.0216075	0.849755	0.499424
MSMEG0715	1.66536	0.0176115	1.0618	0.565568	1.25516	0.0354284	1.15224	0.482005	1.07356	0.694414
MSMEG0716	2.01211	0.020319	1.49267	0.00470455	1.09746	0.667878	1.20723	0.237349	1.30536	0.180994
MSMEG0717	0.578796	0.0205899	0.991954	0.931075	2.4044	0.00216453	1.77635	0.00196043	3.99493	0.00505938
MSMEG0718	2.33307	4.71351e-07	0.942732	0.573949	1.45707	0.0411818	1.37515	0.03095	1.57877	0.00349503
MSMEG0719
MSMEG0720	1.33284	0.165091	0.92143	0.309534	1.23486	0.12323	0.997045	0.989607	0.97888	0.927275
MSMEG0721	1.33597	0.0866015	1.09026	0.120524	1.59087	2.83536e-05	2.22793	0.000400801	1.81458	0.000478591
MSMEG0722	0.460289	0.000236581	0.775652	0.000740609	0.402219	3.50721e-05	0.399184	6.15461e-07	0.460782	8.69737e-05
MSMEG0723	0.538183	0.00844813	0.910638	0.258887	0.555416	0.00959166	0.507788	0.0167268	0.554894	0.0417851
MSMEG0724	0.769712	0.118634	0.850634	0.000926585	0.794271	0.00111139	0.671929	0.00910391	0.719449	0.0724765
MSMEG0725	0.9013	0.584069	0.944763	0.454716	0.78536	0.132717	0.645678	0.00165258	0.824195	0.0175375
MSMEG0726	1.47109	0.200685	0.898834	0.0426918	0.938227	0.810562	1.35996	0.0893268	1.45091	0.232548
MSMEG0727	1.42759	0.1108	1.08164	0.465927	1.38284	0.0360645	1.03285	0.84721	1.29495	0.00100604
MSMEG0728	0.502345	0.00219339	0.963916	0.662486	1.35452	1.43679e-08	1.19701	0.171114	1.3672	0.00119943
MSMEG0729	1.40957	0.0897306	0.907671	0.0310667	1.21302	0.000655107	1.13016	0.265594	1.16469	0.103953
MSMEG0730	1.30191	0.168347	1.07992	0.431318	1.08559	0.0451836	1.03805	0.264261	0.999548	0.996444
MSMEG0731	0.910284	0.623711	1.03622	0.659996	0.527111	0.00339203	0.498006	0.0103565	0.678055	0.0458058
MSMEG0732	0.717609	0.0817344	0.848379	0.0610464	1.02141	0.877722	1.02149	0.84232	1.31479	0.331768
MSMEG0733	0.788543	0.124921	0.924097	0.503459	0.866881	0.00580659	0.773371	0.0960553	0.779132	0.0172005
MSMEG0734	1.10602	0.0229283	0.751696	0.0124205	0.819317	0.275461	0.753154	0.139543	0.844561	0.240895
MSMEG0735	0.643935	0.000188613	0.774441	0.00274833	0.62649	0.00214075	0.571107	0.0102857	0.703502	0.120682
MSMEG0736	0.750068	0.356156	0.927831	0.391826	1.0557	0.706696	0.944105	0.808369	1.03126	0.848185
MSMEG0737	1.47875	0.0916478	0.973352	0.821375	2.00114	0.0173526	1.68817	2.87459e-05	1.8377	1.9729e-06
MSMEG0738	0.728269	0.119562	0.581035	0.000524587	0.466956	0.0580882	0.235756	0.000336186	0.28209	0.000332731
MSMEG0739	1.5063	0.0372451	0.953427	0.173619	1.75672	2.7549e-05	1.66138	0.000250667	1.976	6.80466e-09
MSMEG0740	0.584932	4.35051e-05	0.851364	0.0199846	0.809363	0.150393	0.709176	0.0790391	0.723866	0.154008
MSMEG0741	0.76755	0.031658	0.727547	0.000850563	1.19726	0.128436	1.16902	0.425964	1.42111	0.00226432
MSMEG0742	1.11104	0.684446	1.0657	0.417148	0.549409	0.0320094	0.373404	0.0001607	0.351309	0.000887477
MSMEG0743	0.882812	0.0168444	0.713739	0.00199691	0.86827	0.0706034	0.778254	0.108171	0.776145	0.281702
MSMEG0744	0.619831	3.42132e-05	1.18179	0.0836143	0.309408	4.83015e-10	0.324907	1.64317e-09	0.335821	1.18951e-09
MSMEG0745	1.88387	0.0437144	1.06421	0.597239	0.927896	0.606675	0.829151	0.527522	0.810595	0.518201
MSMEG0746	0.701472	0.0232043	0.791065	0.00314872	0.594041	0.0805669	0.814047	0.516475	0.636058	0.147831
MSMEG0747	0.838009	0.253236	1.03259	0.724172	1.62457	0.00888135	1.53643	0.0306715	1.70399	0.0137359
MSMEG0748	0.793779	0.0506842	1.05719	0.405931	1.0533	0.330136	1.08136	0.395295	0.987431	0.669211
MSMEG0749	0.785557	0.000839531	0.786254	0.0041494	0.912611	0.43469	0.86075	0.0550047	0.876791	0.592268
MSMEG0750	1.13358	0.0921488	1.06105	0.585309	1.25829	0.00460777	1.13404	0.205743	1.1543	0.0396258
MSMEG0752	0.495233	0.016155	0.678972	0.00166886	0.34585	6.45557e-06	0.31026	6.16768e-05	0.313722	4.76271e-07
MSMEG0753	1.66567	0.00386718	1.04607	0.68799	1.81783	2.74999e-05	1.86148	3.11456e-05	1.94084	5.78306e-05
MSMEG0754	0.801692	0.0515326	1.13058	0.00487952	0.853364	0.0288669	0.825482	0.175639	0.810738	0.00444234
MSMEG0755	0.943992	0.695798	0.824064	0.229679	0.629501	0.133392	0.648894	0.13651	0.713289	0.134506
MSMEG0756	0.638503	0.0741617	1.38209	3.00728e-08	1.34755	5.45758e-06	1.53791	4.23166e-05	1.41562	0.0121879
MSMEG0757	1.48939	0.0331493	0.886789	0.244575	0.812214	0.0883182	0.812214	0.349566	0.853093	0.22792
MSMEG0758	1.06586	0.688263	1.08588	0.523633	1.0931	0.754126	0.967354	0.885068	0.860728	0.35884
MSMEG0759	1.12625	0.295605	0.847214	0.00435412	0.978138	0.905189	1.08993	0.612555	1.02586	0.939094
MSMEG0760	2.59296	7.34427e-05	1.28933	0.000473575	1.48506	0.0759396	1.87766	0.000769054	1.81378	0.000483119
MSMEG0761	1.48073	0.183595	0.89039	0.48962	0.580214	0.0396897	0.509834	0.0247493	0.56022	0.0411862
MSMEG0762	0.717198	0.172519	1.00716	0.872757	0.922993	0.142643	0.9069	0.662173	1.0071	0.899548
MSMEG0763	1.91811	1.52884e-05	1.27874	0.0460288	1.52002	0.0219151	1.37758	0.109526	1.8126	0.0321499
MSMEG0764	1.54749	0.00166271	1.00473	0.909929	1.67857	0.018864	1.8194	3.59452e-08	1.71026	0.00417117
MSMEG0765	0.511084	0.00935451	0.93931	0.783447	1.02748	0.772383	0.978486	0.738771	1.66718	0.049463
MSMEG0766	1.24033	0.202994	1.26169	0.0372895	0.948617	0.834256	1.09157	0.761543	0.659184	0.137476
MSMEG0767	1.14188	0.307463	1.55282	0.00512585	0.90378	0.0615042	0.891401	0.00804536	0.844029	0.165309
MSMEG0768	1.23751	0.279405	0.853088	0.111424	0.676524	0.0200635	0.647982	0.0575901	0.566655	0.0310508
MSMEG0770	2.02047	0.00827613	0.945243	0.713908	1.13137	0.632718	1.0759	0.831182	1.10165	0.613762
MSMEG0771	0.865402	0.475626	1.11161	0.0360794	1.48784	2.65809e-06	1.5851	2.49696e-06	1.51597	5.60729e-05
MSMEG0772	0.913333	0.510391	0.991148	0.915232	0.901188	0.619146	1.06754	0.61714	1.0419	0.855773
MSMEG0773	1.13908	0.366567	1.02882	0.349509	1.15556	0.250694	1.04468	0.795379	1.02036	0.898311
MSMEG0774	1.35478	0.0366532	1.09119	0.240326	1.24921	0.000929191	1.18826	0.0468028	1.24632	0.000979529
MSMEG0775	3.15471	2.55737e-05	1.23667	0.0737996	1.699	6.0441e-05	1.85455	0.000354798	1.80105	0.00147934
MSMEG0776	1.88674	0.00761682	1.33552	0.03093	1.70264	5.78026e-05	1.946	0.00149298	1.69315	0.000231607
MSMEG0777	1.36714	0.00875566	1.29899	0.000765849	1.29606	0.00196439	1.30675	0.00436261	1.4763	1.80028e-05
MSMEG0778	0.435856	0.000150576	0.602218	5.74793e-07	0.314129	0.000132584	0.288892	0.00102911	0.283563	0.000101299
MSMEG0779	0.853899	0.218431	0.836986	0.111776	0.571335	1.45656e-06	0.643543	0.0650081	0.645741	0.00128186
MSMEG0780	0.600208	0.0340405	1.17521	0.00426922	1.54343	1.144e-05	1.2885	0.000688715	1.37584	0.00129025
MSMEG0781	1.50604	5.29365e-05	1.07792	0.526134	1.5801	0.037874	1.52003	1.70463e-06	1.96403	0.0101944
MSMEG0782	1.31133	0.29009	1.11628	0.122507	1.77865	4.22901e-06	1.85666	7.29554e-07	1.83938	5.29906e-06
MSMEG0783	0.971903	0.59726	0.736001	0.000102467	0.527024	0.00114444	0.465468	0.0104319	0.481314	0.00557477
MSMEG0784	0.62307	0.00128912	0.992884	0.910894	0.619739	0.0127363	0.81353	0.23393	0.780798	0.047641
MSMEG0785	0.521725	0.00259941	0.979461	0.743914	1.19826	0.00389915	1.16272	0.173469	1.13188	0.32543
MSMEG0786	1.88121	0.0323425	0.990034	0.933019	0.738836	0.0925733	0.696513	0.0123504	0.638525	0.059306
MSMEG0787	0.772644	0.257738	0.989403	0.941813	1.23867	0.183038	1.31535	0.0069703	1.21975	0.062053
MSMEG0788	0.748188	0.00303529	1.1285	0.0278942	0.863552	0.345818	0.852021	0.364944	0.884614	0.604323
MSMEG0789	1.44323	0.0271064	1.04011	0.486888	0.594925	0.0341813	0.858069	0.508686	0.60465	0.0959182
MSMEG0790	1.5639	0.156033	0.875575	0.445918	0.584027	0.065488	0.734786	0.163985	0.573649	0.0108155
MSMEG0791	0.567314	0.00761262	0.794516	0.00517413	0.888958	0.177941	1.1518	0.521749	1.00472	0.985761
MSMEG0792	0.870867	0.00824939	0.875938	0.172825	1.24425	0.25377	2.06104	0.0395016	1.29394	0.059406
MSMEG0793	0.900172	0.594663	0.984962	0.78503	1.90683	6.91771e-05	2.32609	0.0124751	1.60903	0.00114877
MSMEG0794	1.12142	0.198389	0.928563	0.427291	1.34434	0.000117881	1.41639	1.94339e-05	1.37654	0.00304425
MSMEG0795
MSMEG0796
MSMEG0797	1.21758	0.102427	0.94791	0.716606	1.09744	0.179363	1.22241	0.49418	1.30821	0.0293109
MSMEG0798	1.20267	0.530172	1.50295	0.00327121	1.90813	0.00274388	2.95447	4.43994e-05	3.00592	6.69398e-05
MSMEG0799	0.793822	0.109639	0.758104	0.11114	1.36321	0.0591808	1.07845	0.23746	1.23748	0.00931211
MSMEG0800	0.575045	0.0316298	1.20701	0.0502386	1.48719	0.0127302	1.17625	0.047899	1.31376	0.00390143
MSMEG0801	0.675484	0.0196018	0.98457	0.845568	0.499629	2.99334e-06	0.586787	0.00170206	0.580165	7.6739e-05
MSMEG0802	1.00795	0.968036	1.2796	0.0348958	0.716769	0.183637	0.928891	0.61241	0.836124	0.00251128
MSMEG0803	0.89738	0.226654	1.50555	1.75833e-05	2.20928	3.13222e-07	1.91619	1.91386e-07	1.99368	2.40396e-08
MSMEG0804	0.879645	0.0104016	1.15809	0.0005071	1.0349	0.316509	1.11685	0.416822	1.12919	0.583163
MSMEG0805	0.83573	0.401603	1.28751	0.0041608	1.42882	0.00193865	1.38804	4.59014e-07	1.63805	0.00580424
MSMEG0806	0.800531	0.273324	1.00996	0.938045	0.826984	0.423594	0.946304	0.752532	0.952291	0.774648
MSMEG0807	0.440014	0.000141299	0.873247	0.164387	0.459386	0.00287495	0.545443	0.00882515	0.532983	0.00272
MSMEG0808	1.80648	2.16948e-05	0.962178	0.671836	1.65265	0.000197553	1.54629	0.000819229	1.66668	0.00140299
MSMEG0809	1.63759	0.0168858	1.18266	0.0896169	1.33836	0.122456	1.14714	0.388145	1.07967	0.668733
MSMEG0810	0.873414	0.111222	0.836172	0.0896422	1.20722	0.00758004	1.18617	0.00189479	1.10883	0.150581
MSMEG0811	0.741094	0.0528047	0.999435	0.996929	0.881476	0.352424	0.978737	0.929606	1.12796	0.367554
MSMEG0812	0.939607	0.659637	1.15262	0.29765	1.60772	0.0263655	1.29252	0.121467	2.04107	0.0677878
MSMEG0813	1.43776	0.0606319	0.942473	0.525805	0.790049	0.00916789	0.731107	0.127008	0.658722	0.027489
MSMEG0814	1.65329	8.49279e-05	1.12295	0.013368	1.16575	0.0311639	1.1169	0.026915	1.07096	0.558411
MSMEG0815	1.01769	0.925554	3.288	0.00030226	0.765124	0.203566	0.686064	0.0472427	0.694639	0.0634656
MSMEG0816	0.863141	0.0285242	0.884396	0.212476	0.806426	0.380547	0.819585	0.32734	0.976502	0.916236
MSMEG0817	2.02923	0.0013364	0.982929	0.849943	1.51419	0.00684673	1.33483	0.30957	1.30942	0.426038
MSMEG0818	0.891923	0.551316	0.703821	0.0103333	0.65513	0.0398925	0.641256	0.00185178	0.599286	0.00651575
MSMEG0819	2.04305	2.02917e-06	0.969528	0.570655	1.78676	3.05387e-06	1.93354	0.000214601	2.98303	2.32057e-08
MSMEG0820	0.923547	0.45179	1.34617	0.0163369	0.977933	0.711717	1.01217	0.8552	0.952977	0.639396
MSMEG0821	1.75718	0.0069699	1.44119	0.00193945	0.967589	0.80258	1.34041	0.100493	1.13821	0.430286
MSMEG0822	0.49748	3.4516e-05	0.587766	9.61345e-06	0.40384	0.00469418	0.419475	0.00164418	0.230125	5.76324e-06
MSMEG0823	0.759072	0.271171	0.84467	0.00308165	0.753802	0.0761696	0.755225	0.120284	0.758754	0.0652165
MSMEG0824	1.49849	0.0190174	0.816726	0.0626584	1.18321	0.0932336	1.07773	0.611596	1.07341	0.694214
MSMEG0825	2.40424	0.00458568	1.42867	3.00948e-05	1.80224	4.70368e-05	1.73833	0.000742087	1.79931	0.0108823
MSMEG0826	1.45423	0.0816047	0.961695	0.637689	0.483845	0.0535799	0.57385	0.033471	0.569766	0.0585277
MSMEG0827	1.34814	0.158172	1.09258	0.419127	1.1895	0.303899	1.04168	0.849035	1.32766	0.141619
MSMEG0828	0.49475	7.24486e-05	0.782602	0.0122223	0.704748	3.15451e-05	0.707836	0.00495234	0.603617	0.00259274
MSMEG0829	0.900798	0.133913	1.13123	0.00420799	1.09183	0.572666	1.382	0.0223062	1.15143	0.458579
MSMEG0830	0.869248	0.521513	1.03422	0.809777	0.472116	0.00047257	0.682484	0.170509	0.575336	0.0215712
MSMEG0831	2.59691	0.00437785	2.34512	0.00029222	0.747811	0.00967155	0.833308	0.00103582	0.956947	0.762065
MSMEG0832	0.852419	0.503688	0.594611	0.00769583	0.951461	0.608731	0.789862	0.162324	0.98235	0.849873
MSMEG0833	0.813103	0.221624	0.614564	0.000113124	1.0141	0.913872	0.919688	0.339341	1.17651	0.098815
MSMEG0834	2.82274	7.17144e-05	1.24597	0.0364832	1.6851	1.0639e-05	1.83443	4.60369e-06	2.47764	1.79913e-07
MSMEG0835	4.20526	6.93245e-07	1.22493	0.0953973	2.28701	7.44029e-06	2.35187	8.54097e-07	3.36771	1.17875e-13
MSMEG0836	0.940893	0.797016	1.40475	0.00474354	0.942244	0.79133	0.792277	0.324157	0.891211	0.708957
MSMEG0837	0.833644	0.0405277	1.37476	0.000202144	1.2578	0.0739305	1.31396	0.013238	1.10863	0.375806
MSMEG0838	0.601308	0.000309894	1.55569	0.0253076	1.58951	4.86755e-05	1.50097	3.74897e-06	2.27351	0.00257979
MSMEG0839	1.19611	0.266208	0.963073	0.681107	1.08121	0.31226	1.20994	0.421532	1.09012	0.553938
MSMEG0840	0.607887	0.00113622	1.24937	0.000202846	1.32705	0.0163999	1.40887	0.000332224	1.37325	0.000163682
MSMEG0841	1.01672	0.925573	1.10941	0.330511	1.34385	0.0232475	1.88277	0.0247072	1.5989	9.21032e-05
MSMEG0842	0.868968	0.246647	0.799132	0.0760406	1.54712	0.14095	0.967138	0.549166	1.17263	0.0102935
MSMEG0843	0.689115	0.000272424	1.01389	0.872496	0.788574	0.234726	0.771597	0.025097	0.808447	0.331126
MSMEG0844	0.425568	0.0173559	1.14326	0.478478	1.25181	0.115266	1.07029	0.447374	2.2989	0.0265785
MSMEG0845	0.838684	0.408844	0.875103	0.329365	0.721888	0.0945222	0.791248	0.105001	0.754969	0.0597002
MSMEG0846	0.763434	0.235376	0.896397	0.00123679	0.808483	0.441008	0.630372	0.0140266	0.561881	0.0193994
MSMEG0847	0.932585	0.652466	1.01979	0.865846	1.00747	0.968482	0.90551	0.686017	0.961147	0.764329
MSMEG0848	1.27101	0.000813164	0.981415	0.772547	1.57883	3.14057e-05	1.6846	9.68195e-06	2.40232	1.31899e-05
MSMEG0849	0.941486	0.713788	1.40887	0.149776	0.894082	0.0343688	0.84597	0.113955	0.916558	0.307327
MSMEG0850	2.05974	0.00549927	1.18811	0.082529	1.4757	2.18399e-06	1.26273	0.00640527	1.44895	0.0498388
MSMEG0851	1.06335	0.721851	1.1159	0.00302753	1.32516	0.205677	1.26196	0.210919	1.01517	0.958754
MSMEG0852	1.38331	0.00376921	0.851493	0.176578	1.42495	0.044311	1.53603	0.0736983	1.53204	0.00441548
MSMEG0853	1.08458	0.654603	1.30543	0.112863	0.549455	0.00116533	0.653472	0.00142346	0.642628	0.00276706
MSMEG0854	1.01398	0.935209	0.79812	0.157669	0.650352	0.0266597	0.681819	0.179278	0.59414	0.011979
MSMEG0855	0.750749	0.261149	0.888224	0.377488	0.994584	0.944617	1.0382	0.728745	0.90457	0.408757
MSMEG0856	1.27563	0.241204	1.15946	0.146444	1.01923	0.898559	1.00084	0.996489	0.875237	0.402105
MSMEG0857	1.24034	0.406522	1.03754	0.711849	0.47711	0.0127358	0.453952	0.0212799	0.447362	0.0268743
MSMEG0858	1.05942	0.79263	1.063	0.384321	0.837254	0.489746	0.634187	0.0882289	0.602623	0.0764495
MSMEG0859	0.683083	0.000266865	0.753814	0.0517852	0.237843	1.44783e-06	0.450731	0.000854151	0.349713	0.00204241
MSMEG0860	0.687708	0.0517804	0.784664	0.0996449	0.491051	0.000567999	0.430655	0.000445453	0.583393	0.0135998
MSMEG0861	1.41973	0.0135242	0.851715	0.192484	0.196193	6.5326e-05	0.572844	0.022609	0.294464	3.15588e-06
MSMEG0862	1.38992	0.0532683	1.34908	0.0328984	1.37438	0.00297258	1.5595	0.000478351	1.36944	0.160924
MSMEG0863	1.16575	0.321365	0.809136	0.092209	1.0427	0.842006	0.894584	0.501137	1.01064	0.918157
MSMEG0864	0.817156	0.238118	0.818787	0.0568235	0.729773	0.0828756	0.713976	0.0878914	0.56705	0.0263811
MSMEG0865	1.46935	0.0563752	1.04166	0.492661	1.30809	0.0623648	1.21784	0.10392	1.24824	0.181516
MSMEG0866	1.26289	0.115233	0.826703	0.134323	1.476	8.89426e-05	1.34088	0.108629	1.43566	0.00145091
MSMEG0867	0.548462	0.0594904	0.574456	0.000122506	0.279217	4.92551e-05	0.480548	0.0202435	0.471331	0.0186899
MSMEG0868	1.09935	0.516441	0.956388	0.821423	0.958136	0.878401	0.912988	0.692477	0.726393	0.406238
MSMEG0869	1.57992	0.00155747	1.25215	0.00382492	1.59708	0.0038024	1.67667	0.000328241	1.39968	0.04622
MSMEG0870	0.961571	0.861281	0.852982	0.0256119	0.823306	0.15573	0.751191	0.117829	0.793257	0.224732
MSMEG0871	0.634625	0.0122688	1.17869	0.000449146	0.889468	0.408712	0.717786	0.364057	0.859104	0.395293
MSMEG0872	0.969077	0.71292	1.24328	0.0016373	0.899554	0.156583	0.90939	0.521652	0.843861	0.159554
MSMEG0873	1.87289	0.00123793	1.6032	0.00511055	0.782981	0.0471084	0.749946	0.0624941	0.758491	5.79908e-05
MSMEG0874	1.84359	5.01791e-07	1.04298	0.767145	1.67371	1.4871e-05	1.32332	0.0900953	1.60766	0.000289305
MSMEG0875	1.24525	0.21713	0.970782	0.644042	1.52455	0.00208679	1.60596	2.71383e-05	1.45861	0.00283075
MSMEG0876	0.847658	0.332034	0.956189	0.685517	0.917102	0.567584	0.938919	0.758918	0.939412	0.729439
MSMEG0877	1.62795	1.3926e-05	0.640705	0.000744818	1.66775	0.000155716	1.37548	0.00373513	1.47878	0.0126567
MSMEG0878	0.580071	0.0159946	0.643281	0.00593996	0.317554	0.000112169	0.299338	4.83306e-05	0.271156	0.00021536
MSMEG0879	1.21191	0.458809	1.41468	0.000448574	1.2369	0.00585631	1.44462	0.0142121	1.21572	0.397229
MSMEG0880	0.502634	0.0016029	0.839205	0.103381	0.5813	0.0103682	0.593046	0.0200752	0.454598	0.000528339
MSMEG0881	0.647387	0.0228153	0.88338	0.0982237	0.584415	0.00089882	0.600414	0.00269232	0.575643	0.00843652
MSMEG0882	1.01031	0.947862	1.06654	0.568477	0.647065	0.000345276	0.594087	0.0303247	0.60939	0.00143733
MSMEG0883	1.99953	0.00208678	1.06037	0.598112	1.04779	0.396456	1.05959	0.58865	1.16877	0.224839
MSMEG0884	0.749607	0.201213	1.08331	0.0458489	1.27327	0.0510679	1.27305	0.00505926	1.6935	0.00972143
MSMEG0886	2.83728	0.00235384	1.31141	0.0054607	2.08165	0.00113309	2.14617	0.00173711	3.74337	0.000226413
MSMEG0887	1.20579	0.00400754	0.903241	0.0027781	1.18564	0.307013	1.18435	0.408873	1.03955	0.822512
MSMEG0888	1.62427	0.0459599	1.37319	0.00452535	1.92342	3.14814e-05	1.95633	5.55425e-06	2.06537	7.07894e-05
MSMEG0889	1.30313	0.358632	1.44319	3.62272e-06	1.72545	2.51827e-05	1.9994	0.000141051	2.14866	0.00847577
MSMEG0890	2.61138	8.83903e-05	1.14556	0.286587	1.82172	0.017566	1.57452	0.00228266	1.50137	0.040152
MSMEG0891	0.870707	0.192129	1.52447	0.0247053	2.28131	0.020087	1.90529	0.0217111	5.05204	0.00146071
MSMEG0892	2.13841	0.0273861	1.23056	0.303736	0.714424	0.192158	0.920955	0.729648	0.627956	0.15645
MSMEG0893	0.917144	0.683885	0.869551	0.138651	0.739223	0.033748	0.748997	0.149563	0.651035	0.0598045
MSMEG0894	0.872609	0.240736	0.876548	0.228609	0.387886	6.66873e-05	0.349642	0.0067678	0.239538	1.05606e-05
MSMEG0895	0.588138	0.00538328	0.722239	0.00147416	0.658723	0.00204667	0.535515	0.0220564	0.524969	0.0047023
MSMEG0896	0.614143	0.0899984	0.978642	0.71557	1.09451	0.136062	0.857929	0.372452	0.931242	0.571193
MSMEG0897	1.09967	0.683804	0.945586	0.745812	0.828025	0.360997	1.08175	0.674912	0.972946	0.818598
MSMEG0898	0.694523	0.00617269	1.15313	0.273753	3.5514	0.00566105	1.3749	0.0368556	1.48235	0.00884533
MSMEG0899	1.12921	0.223363	0.817305	0.000279065	1.23082	0.203211	1.24642	0.186432	1.41849	0.0686606
MSMEG0900	1.07627	0.644482	0.708044	0.0727905	0.377733	0.00365885	0.383222	0.000973813	0.373821	0.00211474
MSMEG0901	1.16269	0.442386	0.955374	0.54265	0.82708	0.441707	0.788141	0.318044	0.70785	0.243072
MSMEG0902	1.01999	0.888895	0.965126	0.803837	0.799246	0.00341067	0.783851	0.0331875	1.29971	0.273026
MSMEG0903	0.951185	0.808455	0.882809	0.330159	0.974517	0.889514	1.02195	0.918055	1.00776	0.95037
MSMEG0904	1.5881	0.0696358	1.06153	0.618918	1.00123	0.983336	1.06406	0.559336	1.11253	0.680785
MSMEG0905	1.03398	0.84798	1.08018	0.497336	1.2592	0.0686483	1.25298	0.00744856	1.27554	4.72799e-05
MSMEG0906	1.18411	0.182174	1.43394	0.00684886	1.45131	1.45278e-05	1.82123	4.06828e-07	2.06897	0.000794097
MSMEG0907	1.91332	0.00787959	1.29241	3.16377e-06	1.48322	0.0282189	1.5281	0.000598971	1.71488	0.00188336
MSMEG0908	0.904523	0.0069818	1.09383	0.0720898	0.772089	0.19929	1.25343	0.0530811	1.16351	0.502269
MSMEG0909	0.557669	0.00951861	0.718847	0.048863	0.301576	0.000530312	0.442097	0.00540407	0.446273	0.002694
MSMEG0910	1.54111	0.0205148	1.04963	0.549809	1.47104	0.0187192	1.3845	0.00608353	1.52836	2.43296e-05
MSMEG0911	1.5645	0.00454988	1.06418	0.530622	0.643388	0.0483448	0.689606	0.0622113	0.597165	0.00167717
MSMEG0912	1.20263	0.188594	1.40716	0.00585192	1.0287	0.871443	1.0076	0.945869	0.857992	0.381051
MSMEG0914	1.22884	0.337643	1.37458	0.017125	1.2627	0.427079	1.33169	0.199526	1.11472	0.521439
MSMEG0915	0.844249	0.264512	1.18858	0.119755	1.06271	0.729331	0.905936	0.369525	0.817473	0.244789
MSMEG0916	1.00246	0.984816	1.2588	0.0314035	0.780706	0.0112669	0.784879	0.0973002	0.710443	0.001198
MSMEG0917	1.73506	0.128999	1.07425	0.545339	0.835603	0.277648	0.693865	0.118998	0.848898	0.567301
MSMEG0918	0.432141	0.00528926	1.14673	0.0456797	1.58964	0.00031803	1.52256	2.30937e-07	2.2775	9.45855e-05
MSMEG0919	0.664644	0.208688	0.733092	0.00103858	0.387975	2.96039e-05	0.40868	2.52222e-08	0.284569	1.0295e-06
MSMEG0920	3.0841	0.000548961	1.20202	0.0443516	1.1443	0.319743	1.15213	0.0287574	1.21304	0.192215
MSMEG0921	1.21233	0.048726	1.46604	0.000252337	1.83321	3.72334e-08	2.06995	3.01247e-07	2.19538	3.48973e-07
MSMEG0922	0.641559	0.0191777	1.04939	0.0625449	1.01207	0.934851	0.991279	0.956972	1.06646	0.677978
MSMEG0923	1.25285	0.188582	1.32714	0.0682127	1.39516	0.040513	1.55704	0.0498093	1.37448	0.0149886
MSMEG0924	1.40819	0.0510338	1.22367	3.26355e-05	1.12326	0.0135297	1.19618	0.158143	1.16366	0.209993
MSMEG0925	0.494865	0.0131956	0.867885	0.108406	0.863562	0.164301	0.712602	0.0112037	0.803969	0.270837
MSMEG0926	0.826963	0.176282	0.996441	0.950105	0.548876	0.0141637	1.12535	0.740775	0.403246	0.0323709
MSMEG0927	0.814169	0.320917	0.574019	5.44774e-06	0.320089	0.00041062	0.271173	1.21128e-05	0.409258	0.00549224
MSMEG0928	0.588786	0.00801527	1.15395	0.284568	0.649182	0.000291245	0.694918	3.78347e-09	0.699906	0.0782521
MSMEG0929	0.715681	0.0343857	0.627739	3.48113e-06	0.576635	0.0122021	0.461519	0.00476121	0.820312	0.532037
MSMEG0930	1.14878	0.407061	1.08075	0.66642	1.27164	0.2751	1.19387	0.163581	1.20356	0.205819
MSMEG0931	3.34177	2.84276e-08	1.66079	0.0334772	3.19172	1.77655e-05	4.24504	8.25417e-06	5.00544	6.66078e-08
MSMEG0932	1.32449	0.0819537	1.30106	4.61879e-06	0.917115	0.701012	1.00094	0.996963	0.892864	0.429133
MSMEG0933	0.6096	1.70162e-05	1.12502	0.0266914	1.10191	0.0925316	1.00981	0.929315	0.910213	0.429508
MSMEG0934	0.553771	0.0304067	0.81543	0.00014816	0.775239	0.000240486	0.622196	0.0167971	0.74585	0.0251269
MSMEG0935	0.904361	0.541347	0.888876	0.357625	0.505337	0.00609281	0.544916	0.0246152	0.403218	0.00183208
MSMEG0936	1.00704	0.957159	1.27247	0.0614038	0.844101	0.301454	1.04723	0.695081	0.913197	0.560625
MSMEG0937	1.08914	0.230463	1.25828	0.0359424	1.08271	0.573539	0.990811	0.951787	1.16372	0.342223
MSMEG0938	0.743709	0.137621	0.732886	0.00121377	0.456279	1.1933e-07	0.436661	2.85711e-05	0.529311	2.03254e-06
MSMEG0939	1.10399	0.639562	1.27814	9.26734e-07	1.304	0.000370393	1.17612	0.479988	1.3461	0.023761
MSMEG0940	1.27392	0.0361583	1.002	0.980113	1.5897	1.27064e-06	1.59074	9.56778e-06	1.59869	0.000643954
MSMEG0941	1.41058	0.0367624	0.839874	0.00218615	1.31958	0.000172923	1.38436	8.24934e-05	1.53511	7.09341e-06
MSMEG0942	2.0644	0.00365902	1.43339	1.23051e-06	1.75538	1.20326e-05	2.10075	3.51401e-05	1.99399	4.495e-05
MSMEG0943	1.0333	0.845522	1.21871	0.188073	0.979361	0.829246	1.07107	0.677796	1.03708	0.782718
MSMEG0944	0.817243	0.224144	0.857972	0.199264	0.449308	0.000915566	0.484723	0.00521629	0.430969	0.00102919
MSMEG0945	0.685202	0.202318	1.29473	0.161457	0.883926	0.578389	0.718749	0.125616	0.766122	0.311223
MSMEG0946	0.393231	1.26716e-05	1.11116	0.210441	1.13445	0.129582	0.913168	0.469498	0.900066	0.551897
MSMEG0947	1.40021	0.120692	1.29618	0.10977	1.68673	0.0380666	1.47559	0.0970234	1.31797	0.336388
MSMEG0948	0.542119	0.017062	1.00729	0.876941	0.857596	0.00359152	0.788895	0.19214	0.730515	0.00599155
MSMEG0949	2.43088	0.0243629	1.6512	0.0949722	2.1608	0.0258856	1.7515	0.0867485	1.165	0.410675
MSMEG0950	0.869694	0.503344	0.884733	0.265712	1.21506	0.0273782	1.09393	0.354157	1.4851	0.00864785
MSMEG0951	1.05656	0.762342	1.14375	0.249313	0.896495	0.371092	0.984034	0.904883	0.968338	0.82233
MSMEG0952	0.726318	0.135341	0.940368	0.559204	0.525183	0.000465809	0.588388	0.000517068	0.659752	0.00399783
MSMEG0954	1.50724	0.0531233	1.28357	0.00841914	1.36035	0.0150406	1.53657	0.0360889	1.81127	0.00651882
MSMEG0955	1.36462	0.344827	1.46801	0.00184213	0.711656	1.35187e-05	0.859105	0.0215108	1.03817	0.771471
MSMEG0956	0.852419	0.368227	0.727003	0.00149869	0.506808	0.0513421	0.695514	0.0628654	0.559778	0.109707
MSMEG0957	0.524262	0.00131752	1.01881	0.693625	1.22169	0.00582864	1.05284	0.434549	1.07848	0.606036
MSMEG0958	0.887195	0.646519	1.0405	0.781335	0.912656	0.0791017	0.964059	0.877768	1.37482	0.10452
MSMEG0959	1.73645	0.0350861	1.07265	0.295637	1.5653	0.00234507	1.42917	0.138565	1.84852	0.0440705
MSMEG0960	0.561361	0.00200105	1.24711	0.00219326	1.19696	0.108711	1.22443	0.0265333	1.21251	0.0806602
MSMEG0961	0.769994	0.179857	0.976116	0.776083	0.832468	0.232949	0.880683	0.378839	0.956958	0.684018
MSMEG0962	0.889555	0.506578	0.705964	0.0266772	0.737948	0.143945	0.838716	0.341219	0.658582	0.072054
MSMEG0963	2.54221	2.38167e-06	1.365	0.00427365	2.22414	0.00139842	1.82949	0.00266737	2.1869	4.39015e-05
MSMEG0964	2.25259	9.24336e-06	1.12716	0.225681	1.42679	0.166512	1.47095	0.143845	1.04263	0.840368
MSMEG0965	1.43268	0.35156	0.582105	0.0232412	0.532177	0.066469	0.451176	0.0244501	0.41724	0.00305441
MSMEG0966	1.29677	0.288081	0.767759	0.0470876	0.48579	0.0212234	0.878539	0.567811	0.671667	0.192822
MSMEG0967	0.738545	0.266945	1.13427	0.24149	1.22659	0.0018314	1.18388	0.0858037	1.27134	0.0141209
MSMEG0968	1.44975	0.0958185	1.04864	0.780372	1.14174	0.0318581	1.25111	0.000683332	1.25127	0.00120364
MSMEG0969	1.05559	0.823377	1.05848	0.646501	1.08095	0.614691	1.04213	0.861373	0.935517	0.809629
MSMEG0970	1.26366	0.305864	1.0337	0.846102	0.911479	0.529969	0.738115	0.0366663	0.669846	0.0274437
MSMEG0971	0.651915	0.111541	1.03336	0.381149	0.972738	0.732388	0.929511	0.609982	0.827692	0.0744199
MSMEG0972	1.51515	6.70609e-05	0.767588	0.000754839	1.45914	0.0998792	1.17065	0.319907	1.37142	0.0091012
MSMEG0973	0.499936	0.0254513	0.849666	0.153659	0.838175	0.00528614	0.67019	0.026253	0.817638	0.312663
MSMEG0974	0.745044	0.0448956	0.984597	0.846409	0.705248	0.0215637	0.660046	0.0710235	0.840155	0.167833
MSMEG0975	0.534475	0.0023299	0.934521	0.520097	0.946434	0.81159	1.1067	0.696028	0.955341	0.818572
MSMEG0976	0.781226	0.00399495	1.14792	0.00372842	0.965516	0.458384	0.982321	0.824642	0.875899	0.0171299
MSMEG0977	1.71164	0.00153606	1.68341	2.47759e-12	2.22674	0.00380103	3.47291	4.1509e-05	2.6882	0.000173502
MSMEG0978	0.794956	0.104885	0.720641	0.0132048	0.593549	0.0606699	0.853399	0.401914	0.479538	0.00960635
MSMEG0979	1.14113	0.51229	0.718664	0.0445782	0.847102	0.446771	0.860516	0.503679	0.639779	0.0991755
MSMEG0980	0.581516	0.000290444	1.00792	0.839022	0.70842	0.00233451	0.729694	0.171157	0.752239	0.0331895
MSMEG0981	1.95691	0.0361965	0.848468	0.231157	1.08191	0.496955	0.792788	0.226312	0.907134	0.667242
MSMEG0982	0.927472	0.729177	1.08971	0.339776	1.21592	0.0735452	1.1532	0.567343	1.13549	0.222795
MSMEG0983	0.622143	0.00621344	0.633028	0.000286028	0.362747	0.00699736	0.532877	0.00342459	0.340331	0.000823523
MSMEG0984	0.834465	0.365884	1.23504	0.000169879	0.945904	0.72344	0.954131	0.719119	0.845243	0.146386
MSMEG0985	0.807214	0.421049	1.07561	0.481424	2.56354	0.0199158	0.947174	0.796852	0.855095	0.42686
MSMEG0986	0.778388	0.00192946	1.09934	0.0316839	0.811102	0.00882513	0.857238	0.0729397	0.719972	0.000236658
MSMEG0987	1.79688	0.020878	1.30092	0.0539568	2.12213	4.44253e-07	2.11854	3.33785e-10	2.49582	0.00041699
MSMEG0988	0.941007	0.431962	0.542007	0.00036063	0.847861	0.530126	0.738374	0.100079	0.596356	0.0805494
MSMEG0989	1.25081	0.202464	0.764642	0.0241832	0.856714	0.563408	0.749228	0.236573	0.755333	0.230078
MSMEG0990	1.74088	0.0287701	1.16977	5.62466e-07	1.22382	0.161319	1.19848	0.0911044	1.23775	0.175627
MSMEG0991
MSMEG0992
MSMEG0993
MSMEG0994
MSMEG0995
MSMEG0996
MSMEG0997
MSMEG0998
MSMEG0999
MSMEG1000
MSMEG1001
MSMEG1002
MSMEG1003
MSMEG1004
MSMEG1005
MSMEG1006
MSMEG1007
MSMEG1008
MSMEG1009
MSMEG1010
MSMEG1011
MSMEG1012
MSMEG1013
MSMEG1014
MSMEG1015
MSMEG1016
MSMEG1017
MSMEG1018
MSMEG1019
MSMEG1020
MSMEG1021
MSMEG1022
MSMEG1023
MSMEG1024
MSMEG1025
MSMEG1026
MSMEG1027
MSMEG1028
MSMEG1029	1.11039	0.0128201	1.23532	0.050536	1.30244	0.0270765	1.29446	0.000668114	1.15105	0.00108055
MSMEG1030
MSMEG1031
MSMEG1032
MSMEG1033
MSMEG1034
MSMEG1035
MSMEG1036
MSMEG1037
MSMEG1038
MSMEG1039
MSMEG1040
MSMEG1041
MSMEG1042
MSMEG1043
MSMEG1044
MSMEG1045	0.86279	0.21822	0.900939	0.409291	0.828948	0.11495	0.775205	0.002628	0.779014	0.0208537
MSMEG1046	1.83779	0.00872901	1.13881	0.181824	1.82663	9.90574e-07	2.15498	6.07547e-05	2.48759	3.83063e-06
MSMEG1047	0.644459	0.00226111	0.545821	5.14447e-06	0.569018	0.000357686	0.547091	0.000756334	0.50664	9.30448e-07
MSMEG1048	1.41837	0.0542763	0.870141	0.113227	1.45546	0.00313206	1.38968	0.000220035	1.56205	1.01527e-05
MSMEG1049	0.871136	0.53408	2.01101	1.26355e-05	2.20971	6.3654e-05	2.1368	0.000731166	2.24974	0.00532145
MSMEG1050	1.24147	0.483312	1.27209	7.17731e-05	0.83581	0.324085	0.943637	0.709685	0.619289	0.0992354
MSMEG1051	1.08279	0.315043	1.20148	0.00196489	0.711206	0.0225462	0.661118	0.00633987	0.598716	0.00705519
MSMEG1052	0.786917	0.19625	1.34196	0.028465	1.38574	0.325024	1.02734	0.923009	0.811422	0.474707
MSMEG1053	1.78454	0.0268255	1.00825	0.961089	1.2109	0.452063	1.46323	0.177206	0.741492	0.147144
MSMEG1054	0.434303	0.000475922	0.7801	0.000783709	0.692614	0.061668	0.768249	0.0423656	0.706737	0.0683376
MSMEG1055	0.589014	6.93085e-05	0.591437	0.00045853	0.43185	0.020776	0.37176	0.00011697	0.332668	0.000939834
MSMEG1056	1.95498	0.00526073	1.56593	0.102378	0.907074	0.345352	0.972813	0.694494	1.12234	0.384815
MSMEG1057	1.62005	0.127344	1.26104	0.00262973	1.52904	1.80087e-05	1.66334	0.00922049	1.45274	0.00942411
MSMEG1058	0.890237	0.745845	0.889529	0.229177	1.03547	0.877388	0.920238	0.540805	0.838644	0.359969
MSMEG1059	2.10663	0.00965462	1.11759	0.287115	1.4501	0.00100226	1.49702	0.00115558	1.94238	0.0180334
MSMEG1060	1.81628	7.6519e-09	1.07032	0.535729	0.947769	0.82217	1.1501	0.366459	0.874528	0.556033
MSMEG1061	1.24552	0.311662	1.05752	0.446571	0.83843	0.230368	0.780375	0.0198084	0.89582	0.0764522
MSMEG1062	0.495522	0.00866367	0.880023	0.19684	0.791061	0.0469703	0.826631	0.000875104	0.628806	0.0518878
MSMEG1064	2.20028	0.0113828	1.23314	0.00339821	0.713301	0.0852031	0.841445	0.474712	0.590221	0.02736
MSMEG1065	0.482872	0.00286538	1.09951	0.128441	1.1963	0.0209423	1.10983	0.0188182	1.10149	0.338976
MSMEG1067	0.591938	0.000440883	0.952223	0.0540875	0.626038	1.56061e-05	0.545341	0.00117396	0.565974	0.00175517
MSMEG1069	1.02001	0.852248	0.83297	0.114179	1.01062	0.963719	0.82599	0.31604	0.909901	0.602852
MSMEG1070	0.644747	0.068154	1.11227	0.259128	1.72025	2.80431e-05	1.66956	0.000655926	1.68445	0.000292333
MSMEG1071	1.03257	0.862618	0.676963	0.0156037	0.371278	0.00502963	0.574466	0.009713	0.398214	0.00221977
MSMEG1072	1.02388	0.919879	0.993585	0.949082	1.32704	0.153001	1.25446	0.00456853	1.57102	2.40557e-05
MSMEG1073	0.856901	0.69129	1.34926	0.00141827	2.23939	2.4601e-07	2.00452	3.76896e-08	2.11569	5.88407e-08
MSMEG1074	1.63473	0.0107509	0.882253	0.283537	1.75861	0.0170437	1.97294	0.0061715	2.17169	0.00472105
MSMEG1075	2.25628	0.00279779	0.947889	0.516435	2.00707	4.40453e-06	2.1552	4.32008e-06	2.6758	2.80635e-10
MSMEG1076	0.779811	0.335442	1.01967	0.772218	6.83508	0.000123706	3.25808	0.00231368	3.37156	0.000187887
MSMEG1077	0.438408	0.000205339	0.941359	0.475679	0.708065	0.00391939	0.753265	0.14477	0.774125	0.00513123
MSMEG1078	0.439614	0.00835368	1.44579	0.00275383	1.60009	0.00106214	1.55294	0.00140818	1.3157	0.021433
MSMEG1079	1.17862	0.262905	1.12451	0.0866221	1.23	0.164536	1.29148	0.00240221	1.28944	0.000788987
MSMEG1080	0.792431	0.185031	0.904745	0.406876	0.872281	0.118352	0.859222	0.232241	0.774133	0.0761775
MSMEG1081	1.06985	0.728267	1.07306	0.492441	1.00637	0.971567	1.16108	0.394372	0.973194	0.911964
MSMEG1082	0.712271	0.0753952	1.89173	0.0321261	1.14932	0.0785217	0.994468	0.950388	1.14872	0.20277
MSMEG1083	1.08876	0.673216	0.816431	0.106912	0.955394	0.816317	1.00335	0.974938	0.914042	0.521671
MSMEG1084	0.826347	0.241384	1.05709	0.702378	0.937339	0.507077	1.03939	0.536695	0.931437	0.622383
MSMEG1085	1.51558	0.023494	0.999218	0.977822	0.898472	0.0145461	0.903997	0.034918	0.856595	0.0868892
MSMEG1086	1.09267	0.53367	0.958933	0.672409	1.6333	0.0950978	1.1717	0.53163	1.12824	0.572513
MSMEG1087	0.639682	0.0015094	0.943484	0.546069	0.969906	0.697594	0.782886	0.103406	0.933028	0.373426
MSMEG1088	0.598982	0.0127737	0.885264	0.379204	0.630495	0.0129744	0.595899	0.0160852	1.22794	0.510658
MSMEG1089	1.10241	0.347251	1.01564	0.836292	1.18676	0.145328	1.04044	0.760149	1.40436	0.00779128
MSMEG1090	0.61592	0.000354984	0.797746	0.0916569	0.562843	0.00373811	0.594504	0.0650783	0.496886	0.00117672
MSMEG1091	1.01801	0.940784	0.954037	0.676717	1.43213	0.024961	1.52274	0.0702613	2.29409	0.0430459
MSMEG1092	1.42478	0.291169	0.911271	0.131351	0.933295	0.773339	1.27494	0.283904	1.15314	0.54736
MSMEG1093	1.43967	0.082932	0.861136	0.0721846	1.29092	0.170882	1.23162	0.080377	1.22579	0.196874
MSMEG1094	0.490321	8.51873e-05	0.614517	3.05959e-06	0.5803	5.0221e-06	0.486937	0.00367883	0.481767	0.000480769
MSMEG1095	0.597327	0.00460814	1.04302	0.425527	1.67448	0.000253354	1.52212	0.000474468	2.79846	0.000370139
MSMEG1096	2.11935	0.0246396	2.44511	0.00191219	0.62214	0.0106736	0.637588	0.00153798	0.611525	0.012254
MSMEG1097	0.855567	0.241672	0.916538	0.125284	0.866055	0.477037	0.947091	0.613048	0.791505	0.042778
MSMEG1098	0.927649	0.114454	0.830086	0.137494	1.3892	0.131077	1.28203	0.0702668	1.04351	0.866483
MSMEG1099	1.23585	0.472056	0.739367	0.0362258	0.897812	0.222964	0.700005	0.0452973	0.745392	0.161408
MSMEG1100	2.33808	0.00438466	1.18321	0.0659752	1.06149	0.304479	1.11442	0.350387	1.09821	0.282227
MSMEG1101	0.897291	0.522778	0.889732	0.0881938	1.21762	0.260524	1.38091	0.000100699	1.34074	8.74333e-05
MSMEG1102	0.58763	0.0640941	0.753757	0.0743874	0.660227	0.000508682	0.68869	0.0495046	0.771728	0.340676
MSMEG1103	0.594992	0.0316201	1.44629	0.022459	1.95076	1.45759e-06	1.86734	4.61324e-06	2.21019	8.38494e-07
MSMEG1104	1.04936	0.636236	1.08014	0.211424	1.01494	0.957414	1.12918	0.546417	0.887508	0.513768
MSMEG1105	0.775031	0.285346	1.43363	9.45296e-06	1.55256	0.00173483	2.01965	2.94044e-07	1.91968	0.000138868
MSMEG1106	1.23854	0.0125166	0.854995	0.253299	1.18579	0.336927	1.21384	0.00163072	1.47206	2.96499e-06
MSMEG1107	0.927471	0.240373	0.622932	0.004026	0.827624	0.351527	0.602227	0.0292616	0.905788	0.660187
MSMEG1108	0.61144	0.00846086	0.589361	0.00499186	0.447097	0.0106026	0.381559	0.000692064	0.448532	0.0152844
MSMEG1109	0.980789	0.881848	0.748955	0.00103658	1.28143	0.0478402	1.24025	0.000314854	1.08848	0.491151
MSMEG1110	0.951204	0.817442	1.09702	0.417997	1.16791	0.300799	1.15736	0.209135	1.26072	0.095325
MSMEG1111	2.1308	0.000356378	0.717731	0.029492	1.26703	0.38518	1.24924	0.203895	1.2418	0.0235592
MSMEG1112	1.58617	0.0683369	1.14399	0.0771445	0.967063	0.835662	1.05233	0.724834	1.06007	0.836718
MSMEG1113	0.50509	0.00501965	0.966225	0.538894	0.902473	0.537089	0.881872	0.423684	0.789862	0.194983
MSMEG1114	0.520826	0.000240743	1.20699	0.331589	0.937982	0.57617	0.899561	0.377298	1.06213	0.541831
MSMEG1115	0.827829	0.266997	0.9038	0.222011	0.801451	0.120447	0.820714	0.324292	0.686769	0.14111
MSMEG1116	0.813955	0.35857	0.833176	0.0699327	0.815785	0.0138758	0.827064	0.0325594	0.817581	0.0280138
MSMEG1117	0.568896	0.000935946	0.963191	0.432951	1.01077	0.914295	0.783736	0.0385744	0.851162	0.0899853
MSMEG1118	0.789456	0.224411	0.73131	0.00117191	0.594278	0.0463054	0.532093	0.03394	0.562754	0.0606905
MSMEG1119	1.55637	0.0176179	1.13685	0.0310235	1.79014	0.0134137	1.60045	0.050255	1.68554	0.00351193
MSMEG1120	1.53042	0.013285	2.12279	2.73387e-09	2.02888	1.37705e-05	2.49469	9.18932e-06	1.84903	1.06567e-05
MSMEG1121	1.28404	0.118282	1.10063	0.145929	1.0641	0.571152	1.14221	0.194141	1.01404	0.931195
MSMEG1122	0.968286	0.849814	1.01272	0.758524	0.891981	0.557343	0.769763	0.0928304	0.567187	0.0463442
MSMEG1123	2.82263	0.000248256	1.17432	0.177369	2.56762	4.25544e-05	3.05102	4.73154e-06	2.67959	7.21602e-05
MSMEG1124	1.18253	0.457803	1.05721	0.199678	1.6737	0.000191238	2.32146	0.00094036	2.25514	0.00148782
MSMEG1125	1.11087	0.441968	1.02424	0.782797	1.56228	0.00498385	1.76594	0.00556785	1.75738	0.000121842
MSMEG1127	0.580357	0.0203212	1.32897	0.00313603	1.81743	0.000679008	1.73147	4.43583e-06	2.03968	1.56336e-05
MSMEG1128	2.69507	1.26841e-08	1.08124	0.642316	1.9201	3.11623e-06	1.74098	0.00710514	2.03181	0.000474322
MSMEG1129	0.739919	0.000574752	0.866034	0.274319	0.696882	0.127423	0.711124	0.0938124	0.605788	0.0583335
MSMEG1130	0.497736	7.43623e-06	1.196	0.163425	1.22345	0.00370045	1.18243	0.0180005	1.29903	0.0127796
MSMEG1131	1.1953	0.304641	1.59297	0.000659907	1.39909	0.0401699	1.09849	0.701732	1.16525	0.474472
MSMEG1132	1.17	0.426361	1.35786	0.014623	1.8725	0.000310537	1.7665	2.05409e-06	1.89658	8.62167e-05
MSMEG1133	0.818294	0.290692	1.00195	0.97336	1.20387	0.316638	1.27006	0.246294	1.50479	0.0361165
MSMEG1134	0.646846	0.0660657	1.05904	0.70897	1.15951	0.135669	1.18455	0.456251	1.05419	0.566494
MSMEG1135	0.914188	0.362169	0.873507	0.116605	1.92642	6.0546e-06	1.87242	0.000816301	2.54324	3.98053e-06
MSMEG1136	0.803835	0.490115	1.04968	0.689318	1.23217	0.011758	1.03187	0.807402	1.58834	0.0211512
MSMEG1137	0.594318	0.0353157	1.00032	0.995885	1.20949	0.223486	1.00069	0.997478	0.861627	0.582141
MSMEG1138	1.20595	0.0425192	0.834859	0.00448104	1.17477	0.0582753	0.977488	0.857437	1.13707	0.0834772
MSMEG1139	0.477065	0.000173909	1.06934	0.63375	0.984219	0.736523	0.918695	0.203799	1.37378	0.00433697
MSMEG1140	0.856099	0.458979	0.987578	0.878294	1.05267	0.272454	0.962773	0.613739	0.982084	0.62121
MSMEG1141	0.644914	0.0277891	1.14673	0.192093	1.07723	0.256137	1.05402	0.742094	1.66521	0.0535306
MSMEG1142	0.736696	0.00224972	0.668542	0.00258827	0.8576	0.159271	0.666504	0.0337915	0.727699	0.0488944
MSMEG1143	0.801284	0.0192718	0.620948	0.000359847	0.762669	0.0529599	0.50801	0.00257178	0.57612	0.0139112
MSMEG1144	1.88644	0.00352174	1.03895	0.731531	1.61685	0.00015027	1.46131	0.0499153	1.55564	4.01223e-05
MSMEG1145	0.997684	0.983174	1.2813	0.0642631	1.05658	0.602039	1.09044	0.111595	1.16647	0.14238
MSMEG1146	0.801307	0.167278	0.900708	0.0747323	2.30648	0.0422658	1.24046	0.00271688	1.37476	0.00634106
MSMEG1147	1.90912	0.00158551	1.05477	0.2337	1.58335	4.61725e-05	1.71823	0.0178789	1.69544	0.0151035
MSMEG1148	1.11061	0.648772	0.890787	0.0818228	0.995067	0.896765	0.834028	0.0545611	2.31004	0.0606784
MSMEG1149	0.831431	0.328022	0.942627	0.130412	1.26729	0.000138017	1.20079	0.0474086	1.36715	0.0128139
MSMEG1150	0.574602	0.00878301	0.780451	0.0730994	0.949134	0.584886	0.818126	0.0793069	0.890138	0.38878
MSMEG1151	0.354572	3.34015e-08	0.861242	0.085418	1.14063	0.0351139	0.723562	0.0961371	1.17672	0.346516
MSMEG1152	1.8117	0.0211148	0.832445	0.00161644	1.49019	0.0793786	1.5873	0.00404468	1.84314	0.001645
MSMEG1154	0.400041	0.000430561	0.972059	0.76311	0.680969	0.0599512	0.934815	0.627223	0.652989	0.0853448
MSMEG1155	3.90141	0.00296585	1.79856	0.00674889	2.09808	0.0118476	1.10884	0.729919	1.0376	0.911356
MSMEG1156	1.84746	0.00798325	1.49091	0.100809	1.16694	0.0104171	1.23348	0.136476	1.06565	0.714939
MSMEG1157	0.72302	0.129763	1.12204	0.291564	0.908785	0.481885	1.03057	0.793812	0.916803	0.57403
MSMEG1158	1.07688	0.705118	0.884087	0.133734	1.27697	0.0472001	1.43924	0.126621	1.1945	0.136901
MSMEG1160	0.572475	0.0801587	0.699758	0.0315841	0.47799	0.026051	0.360766	0.00432477	0.524137	0.0164278
MSMEG1161	0.454728	0.000448264	0.648158	1.6768e-05	0.68914	0.230669	0.676043	0.0345043	0.602159	0.013416
MSMEG1162	1.5141	0.13135	0.969631	0.596279	0.969386	0.93429	0.941962	0.848578	0.325196	9.71962e-05
MSMEG1163	1.53569	0.00270409	0.981177	0.801395	1.62242	0.0251149	1.60926	6.08052e-06	1.74128	5.72677e-06
MSMEG1164	1.15691	0.413576	1.12601	0.177193	1.34375	0.101086	1.13242	0.646671	1.45402	0.077516
MSMEG1165	1.64652	0.00214601	1.03004	0.474919	0.865592	0.15028	0.855098	0.328444	0.879739	0.363724
MSMEG1166	1.4062	0.151445	1.17719	0.0918051	1.11006	0.499568	1.18751	0.419147	1.07817	0.634654
MSMEG1167	1.64398	0.00171985	0.952627	0.448618	1.57078	3.15843e-06	1.64506	3.76939e-06	1.73058	6.25396e-08
MSMEG1168	0.505289	9.20216e-05	0.834689	0.00280082	0.94532	0.795076	0.863515	0.476136	0.935378	0.698594
MSMEG1169	0.635949	0.0364231	1.07765	0.388248	1.83052	9.67448e-05	1.89013	0.000715033	2.6147	0.000370881
MSMEG1170	0.431004	0.000359289	0.963082	0.609336	1.20511	0.013384	1.12734	0.0254538	1.19787	0.133052
MSMEG1171	2.1535	4.85698e-05	1.45704	0.020394	1.81939	0.00989411	1.95503	0.000729518	2.3384	2.84532e-05
MSMEG1172	1.7358	0.138898	1.2055	0.302121	1.33228	0.00758905	1.37604	0.0670477	1.23451	0.108235
MSMEG1173	0.835293	0.0322905	1.67664	0.0142149	0.669325	0.00330623	0.728363	0.0269873	0.734978	0.0975689
MSMEG1174	0.80844	0.231093	1.3198	9.01824e-06	1.3139	0.0827905	0.839796	0.441564	1.39232	0.121199
MSMEG1175	0.698953	0.0597907	1.14308	0.0215198	1.05874	0.167881	0.96311	0.678499	1.12904	0.295517
MSMEG1176	1.03568	0.835749	1.03296	0.811578	1.52694	0.0723126	1.47347	0.0197818	1.15326	0.106152
MSMEG1177	1.20932	1.5421e-05	1.08439	0.655672	0.754613	0.133946	0.977525	0.940181	0.857769	0.543847
MSMEG1178	1.00042	0.998055	1.2846	0.0469456	1.49463	0.187822	1.08481	0.0572031	1.09413	0.462968
MSMEG1179	0.464942	0.00596899	0.920254	0.0707875	0.547829	0.000100971	0.549874	1.98748e-05	0.880371	0.652168
MSMEG1180	0.76175	0.0123565	0.970739	0.759602	1.10526	0.38065	1.20761	0.122467	0.996538	0.984682
MSMEG1181	0.761161	0.164511	1.26135	5.19123e-05	0.995898	0.96533	0.749286	0.178507	0.948777	0.780163
MSMEG1182	0.87763	0.00801515	0.869443	0.0633343	0.956851	0.379251	0.776286	0.124487	0.788054	0.0464312
MSMEG1183	2.04066	0.0132045	0.977681	0.818859	0.917065	0.391427	0.850769	0.420078	0.934601	0.735458
MSMEG1184	0.63811	0.00293112	0.761652	0.0428309	0.478208	0.0204492	0.498298	0.00440408	0.406847	0.00133919
MSMEG1185	0.469423	0.000425889	0.677983	7.69234e-07	0.507324	0.00407812	0.437566	0.00197088	0.531243	0.0134346
MSMEG1186	2.05534	0.00469996	1.81315	0.000153077	2.54657	1.13054e-05	2.97707	1.04841e-06	3.54848	2.79882e-08
MSMEG1187	1.16641	0.556738	1.09371	0.200295	0.912386	0.436927	0.85932	0.228014	0.777465	0.123191
MSMEG1188	1.07106	0.186801	0.830029	0.0616788	1.19872	0.112537	1.37074	0.0372885	1.59341	0.109505
MSMEG1189	0.493049	0.00121863	0.633164	0.0024417	0.405942	0.000113093	0.44264	0.000831505	0.483741	0.00172195
MSMEG1190	0.991497	0.968642	0.930451	0.45344	0.745105	0.153058	0.815271	0.282778	0.62176	0.108942
MSMEG1191	0.464234	0.00408097	0.839141	0.027937	0.662154	7.10749e-05	0.447722	4.31396e-05	0.594852	0.00866482
MSMEG1193	0.649565	0.000303571	1.22058	4.42174e-05	1.00181	0.975453	1.03486	0.753783	1.03041	0.739059
MSMEG1194	0.984838	0.92289	0.928371	0.557814	0.619857	0.0211708	0.610709	0.00221614	0.481272	0.0162084
MSMEG1195	0.722012	0.127644	0.852554	0.0370162	0.916338	0.698304	0.65203	0.061908	0.656676	0.0471493
MSMEG1196	0.505786	0.0823536	1.02304	0.816913	1.09208	0.236203	0.928062	0.568857	1.12158	0.19216
MSMEG1197	1.37405	0.00164097	1.00711	0.91302	1.36541	0.000420627	1.4842	0.0116939	1.49989	0.00196895
MSMEG1198	1.45102	0.00105801	1.23573	6.31444e-05	1.28753	0.0214069	1.33464	0.0105371	1.45261	0.00328689
MSMEG1199	1.11681	0.105806	1.22224	0.0357616	0.818206	0.0394566	0.917384	0.549758	0.699554	0.00734335
MSMEG1200	1.4534	0.0396028	1.38889	0.00247919	1.59781	0.113069	1.47534	0.0359628	1.79142	0.0264575
MSMEG1201	0.794268	0.0405222	0.691561	0.00052002	0.519019	0.00377054	0.445849	0.00122899	0.5301	0.00961971
MSMEG1202	0.682376	0.122264	1.11137	0.0558933	1.19083	0.00371776	1.56497	0.0133738	1.31888	0.106861
MSMEG1203	1.36788	0.103292	1.18209	0.0228758	1.667	0.000108621	1.46309	0.0163617	1.48417	0.0152812
MSMEG1204	1.41932	0.0345465	1.09647	0.356767	0.785191	0.000459145	0.784797	0.000565605	0.628162	0.00139604
MSMEG1205	0.687494	0.126129	0.758325	0.0190425	0.353711	0.00532402	0.640455	0.0341505	0.380685	0.0085344
MSMEG1206	1.38606	0.392311	0.709062	0.00106995	0.701481	0.085362	0.683488	0.152565	0.456723	0.00277355
MSMEG1207	0.488427	0.0110514	0.924221	0.0464763	0.883888	0.251815	0.938365	0.634413	0.844024	0.241104
MSMEG1208	0.385544	2.41782e-05	1.06564	0.630165	0.661889	4.44448e-06	0.582466	9.02022e-05	0.730966	2.02559e-06
MSMEG1209	0.625365	0.0089867	1.08053	0.104627	1.29207	0.253197	0.979874	0.912908	1.15078	0.444094
MSMEG1210	0.967982	0.871174	1.17216	0.0195769	1.10856	0.667442	0.957358	0.88022	1.0226	0.940003
MSMEG1211	1.24865	0.133127	0.785761	0.0146365	0.705019	0.0896441	0.728969	0.302881	0.560864	0.0123816
MSMEG1212	1.1883	0.393568	1.22912	0.0733661	0.696452	0.000709152	0.656462	0.0312537	0.744855	0.0609747
MSMEG1213	1.00311	0.991222	1.03377	0.745635	0.579785	0.0354247	1.06031	0.776634	0.562262	0.00379116
MSMEG1214	4.49005	0.000200685	4.78537	0.000150788	14.78	3.03058e-06	9.3433	4.10719e-07	12.7	5.56753e-06
MSMEG1215	1.24454	0.220191	1.21849	0.180425	0.723897	0.215451	0.884989	0.557802	0.813092	0.309464
MSMEG1216	1.43945	0.0158222	1.78888	0.0269043	0.972782	0.932745	0.822473	0.0375792	0.961756	0.812897
MSMEG1217	1.25346	0.207881	1.03576	0.785041	1.02879	0.836805	1.06459	0.733343	1.12579	0.409277
MSMEG1218	0.703585	0.163434	1.1875	0.00271676	1.18504	0.352446	1.03705	0.803176	1.0039	0.964909
MSMEG1219	1.18907	0.498408	0.87058	0.0992525	1.3274	0.0817866	1.19372	0.225969	1.28482	0.0329229
MSMEG1220
MSMEG1221	1.80394	0.00994178	0.945671	0.495293	1.62809	0.000319181	1.59113	5.50075e-06	1.95578	2.9003e-10
MSMEG1222	0.659958	0.0162495	0.94187	0.660046	1.13198	0.620528	0.706616	0.0604526	1.00917	0.946426
MSMEG1223	2.47048	0.01262	2.3792	0.000994163	1.23794	0.0625477	1.36412	0.0510063	1.43231	0.0420816
MSMEG1224	0.42886	0.00104658	1.22338	0.149762	2.76086	0.000643529	1.65712	3.74348e-06	2.44749	3.33373e-05
MSMEG1225	0.692167	0.0150585	0.68843	0.00966832	0.660576	0.00816069	0.475735	0.00315688	0.515712	0.00609481
MSMEG1226	0.487304	0.002307	1.11162	0.0496347	1.20651	0.00135418	1.0732	0.196776	1.27871	0.00093411
MSMEG1227	0.900701	0.681118	0.900006	0.228916	1.27768	0.203172	1.32481	0.00235818	1.44113	0.0437208
MSMEG1228	0.754183	0.00589128	0.694622	0.000782348	0.405573	0.000266572	0.362486	0.00884078	0.558193	0.0172435
MSMEG1229	2.05896	0.00436641	1.34261	0.152856	0.801765	0.380666	0.824945	0.392073	0.810956	0.296632
MSMEG1230	0.84527	0.182988	0.88743	0.134773	1.30534	0.0455199	0.950755	0.793845	1.18875	0.491269
MSMEG1231	1.268	0.321059	1.22622	0.134911	1.7285	0.000248393	1.79528	0.0012011	1.88025	2.15803e-05
MSMEG1232
MSMEG1233	0.787346	0.219419	1.05659	0.35082	1.41821	0.000709503	1.45567	0.00442708	1.91971	1.12277e-05
MSMEG1234	3.41244	0.000428663	1.42807	0.0296949	2.91613	0.00046033	1.40037	0.0118085	2.22853	0.00023513
MSMEG1235	0.991542	0.975111	1.17431	0.250652	1.08662	0.577871	0.841594	0.315675	1.05693	0.734463
MSMEG1236	3.56186	7.57384e-07	1.32905	0.00697938	2.65638	9.34024e-08	3.07977	1.00203e-05	3.33892	1.95755e-08
MSMEG1237	0.835948	0.290591	1.56609	0.00790667	1.55627	5.85245e-05	1.80257	0.000766431	1.85548	0.000138724
MSMEG1238	2.27871	0.000222303	2.81544	5.9911e-05	2.14469	6.12684e-06	2.58424	2.3143e-05	2.8183	1.09666e-06
MSMEG1239	2.47072	0.00160387	1.07955	0.404171	2.08387	0.00013874	2.40717	2.60357e-05	3.00945	1.86703e-08
MSMEG1240	0.703174	0.0615801	1.5158	2.51933e-06	1.24464	0.00076183	1.56341	0.000782188	1.05066	0.520532
MSMEG1241	0.811464	0.113396	0.921207	0.0984298	1.59919	0.00184515	1.55297	8.8393e-07	1.7575	0.000666276
MSMEG1242	0.722528	0.0143285	0.866094	0.00177173	1.01581	0.852313	0.952845	0.759572	0.816317	0.232567
MSMEG1243	0.493483	0.00598	0.753445	0.000595257	0.865313	0.122213	0.885903	0.347328	0.882101	0.330356
MSMEG1244	1.23355	0.297607	1.14195	0.319895	1.58228	0.0209149	1.74741	8.44069e-05	2.16075	0.0258638
MSMEG1245	0.589991	0.00196278	1.06542	0.351377	1.60883	0.000863392	0.714377	0.394541	1.29781	0.120219
MSMEG1247	0.902127	0.597883	1.24458	0.171109	1.9331	0.00066831	1.82296	1.6627e-07	2.70107	1.60024e-06
MSMEG1248	0.438774	0.00145405	1.73652	0.0355044	2.30603	2.66108e-07	2.34476	0.000331733	2.78943	2.51675e-07
MSMEG1249	2.37	0.0097956	1.47289	1.86657e-05	1.88959	3.3334e-07	2.0537	1.209e-05	2.7562	0.00273412
MSMEG1250	0.518588	0.0036853	1.029	0.614507	1.00758	0.943454	1.20372	0.439827	0.996497	0.98319
MSMEG1251
MSMEG1252
MSMEG1253	1.54114	0.0854649	0.719711	0.0158568	1.42792	0.0128753	1.40821	0.0261286	1.91194	7.78444e-07
MSMEG1254	0.893661	0.336478	1.21276	0.0306389	1.37726	0.000257354	1.31148	0.00255455	1.33801	0.0015426
MSMEG1255	0.799414	0.11786	1.12747	0.438635	1.78649	0.00079831	1.42318	0.00365165	1.78488	0.00117527
MSMEG1256	0.632955	0.00416297	1.12265	0.133831	1.15922	0.0240168	1.1346	0.00583535	1.08654	0.697356
MSMEG1257	0.811776	0.112386	0.636864	0.0101903	0.599722	0.00356114	0.485649	0.00689909	0.636209	0.124666
MSMEG1258	0.782544	0.193503	0.922265	0.416875	1.31111	0.00178053	1.22237	0.18891	1.3626	0.00488122
MSMEG1259	0.729083	0.0856838	1.31005	0.00766246	0.829757	0.186769	0.884664	0.289858	1.52109	0.239259
MSMEG1260	0.745042	0.00549692	0.918081	0.15947	0.790293	0.00117175	0.612189	0.0435524	0.592048	0.0428702
MSMEG1261	0.861822	0.0289678	1.1266	0.00534265	0.791115	0.0395818	0.685182	0.0825301	0.828011	0.177165
MSMEG1262	1.14763	0.0827309	1.16041	0.0885683	1.2028	0.209599	1.36765	0.0549219	1.29756	0.0191962
MSMEG1263	0.591884	0.00129676	1.60932	1.12601e-05	1.29261	0.000750496	1.41002	0.109746	1.43322	0.000199554
MSMEG1264	0.700696	0.179345	1.37031	0.0260202	1.63017	0.000404969	1.44958	7.9788e-07	1.97233	9.75159e-07
MSMEG1265	0.9345	0.591183	0.898796	0.317106	0.864627	0.262295	0.860677	0.295534	0.966439	0.804823
MSMEG1266	1.10913	0.489686	1.01909	0.869128	1.40331	0.10826	1.58102	0.131277	3.22573	0.00982256
MSMEG1267	1.53169	0.036748	1.09745	0.399571	1.40596	0.0417669	1.44302	0.0501433	1.49605	0.0044712
MSMEG1268	1.10978	0.497565	0.63881	1.583e-05	0.512912	0.0191706	0.538344	0.0160785	0.483717	0.0261134
MSMEG1269	1.03004	0.869566	1.04605	0.670362	0.464838	0.00234419	0.564489	0.0149957	0.617469	0.0270577
MSMEG1270	0.902596	0.658142	0.582467	0.00165558	0.565574	0.00603776	0.572153	0.0110675	0.476742	0.0120006
MSMEG1271	1.11222	0.448391	1.15981	0.115607	1.45325	0.00704868	1.69684	0.0123668	1.57798	0.00761187
MSMEG1272	0.823071	0.278341	1.14729	0.109229	1.00563	0.956151	1.26495	0.101471	1.22151	0.240326
MSMEG1273	0.971391	0.859482	1.35928	1.84598e-05	1.29693	0.0663985	1.25738	0.0118871	1.3157	0.042014
MSMEG1274	0.809369	0.410826	0.866753	0.00316981	0.99692	0.984127	0.974334	0.892503	0.881324	0.472327
MSMEG1275	1.01313	0.960688	1.20061	0.0992295	1.04459	0.249451	0.96071	0.727063	0.98912	0.961488
MSMEG1276	2.85963	0.000536112	1.16866	0.00376879	2.00903	0.00550126	2.03891	0.000295854	2.42183	3.81848e-06
MSMEG1277	1.0901	0.367081	0.996611	0.947853	1.26247	0.0428317	1.41893	0.000127289	1.40022	0.000299607
MSMEG1278	1.50349	0.169984	1.0095	0.922117	1.05402	0.684013	0.90269	0.538555	0.877813	0.513425
MSMEG1279
MSMEG1280	0.667033	0.00543835	1.09935	0.00119291	0.695771	8.6524e-06	0.792216	0.0913241	0.605967	0.0513418
MSMEG1281	1.02136	0.895843	0.976763	0.779808	1.1861	0.24485	1.226	0.0613258	1.10365	0.511709
MSMEG1282	0.66721	0.0235603	0.749807	0.000137512	0.857459	0.223321	0.54081	0.00440493	0.615523	0.0664239
MSMEG1283	1.01921	0.763494	0.815351	0.00193077	1.341	0.442011	0.909149	0.667463	1.07	0.793199
MSMEG1284	1.70085	0.00788922	0.932913	0.636176	1.06899	0.69005	1.49225	0.0141423	1.45764	0.0275532
MSMEG1285	0.408178	0.00402261	1.11793	0.171966	1.32097	0.0763995	1.22269	0.180302	1.29333	0.0164874
MSMEG1286	0.798387	0.081365	1.05002	0.46302	0.611983	0.0806017	0.593893	0.0231474	0.457245	0.0365399
MSMEG1287	1.25279	0.498933	0.848217	0.00191544	1.35215	0.00133038	1.23885	0.000213408	1.358	0.0466742
MSMEG1288	0.490746	0.000132747	0.983786	0.886797	1.10099	0.316956	1.41264	0.00897015	1.21976	0.329156
MSMEG1291	0.502452	0.00478386	1.07763	0.154958	1.22233	0.28887	1.20609	0.148332	1.29517	0.0427586
MSMEG1292	2.18116	0.000355668	1.16447	0.23724	1.67107	1.75501e-06	1.61523	0.061712	1.75955	0.00437951
MSMEG1294	0.585693	0.0135851	1.06262	0.401433	1.32527	0.000399434	1.39755	0.0172397	1.56411	0.00132416
MSMEG1295	0.771469	0.111963	0.85855	0.0114283	0.68589	0.0188976	0.805813	0.0127203	0.777254	0.0640556
MSMEG1296	0.487053	0.00234385	0.927836	0.322241	0.777708	0.423682	0.853707	0.584591	0.774997	0.29502
MSMEG1297	0.596309	0.0337217	0.921843	0.391712	1.1551	0.254029	0.947988	0.780673	0.965338	0.851512
MSMEG1298	0.688308	0.0409946	0.524499	6.87979e-09	0.490918	0.000940773	0.542565	0.000524226	0.448639	0.00432135
MSMEG1299	0.616078	0.0312418	1.14078	0.139494	1.12962	0.164415	1.09732	0.463702	1.1147	0.0269167
MSMEG1300	0.824361	0.424675	1.13725	0.0526369	0.962091	0.84623	1.02706	0.933873	0.778512	0.290948
MSMEG1301	3.0464	4.11674e-06	1.04046	0.686131	2.07085	1.10732e-05	1.97116	1.09118e-06	2.56148	6.99176e-11
MSMEG1302	0.837092	0.309656	1.17578	0.0267112	3.40183	2.93384e-05	1.23221	0.170777	2.62221	4.74927e-07
MSMEG1303	0.902908	0.475418	0.982815	0.831004	1.2074	0.191637	1.23022	0.425007	0.994174	0.980215
MSMEG1304
MSMEG1305	0.581439	0.000414834	0.772184	0.03038	0.699194	0.0378706	0.648498	0.0306779	0.718106	0.24881
MSMEG1306	1.23516	0.192535	0.971011	0.537693	1.00232	0.980219	1.01945	0.914154	0.930147	0.650445
MSMEG1308	0.509381	0.0021892	1.11359	0.184555	1.13061	0.0349357	1.16852	0.00449046	1.25506	0.0807967
MSMEG1309	0.660904	0.0377098	1.19907	0.00373111	1.35885	0.0458847	1.11618	0.273429	1.2999	0.00206002
MSMEG1310	1.38934	0.156827	1.13936	1.01455e-05	1.01815	0.870063	0.978767	0.881957	1.03055	0.879126
MSMEG1311	0.677585	0.00312317	1.32191	0.00110342	0.986883	0.914155	1.22418	0.121043	1.23635	0.414631
MSMEG1312	0.600673	1.70373e-05	0.721736	2.17762e-06	0.940585	0.870513	0.439714	0.0121722	0.404689	0.0202875
MSMEG1313	1.14104	0.488433	1.16491	0.05423	5.1629	3.59753e-06	2.39291	1.58476e-05	2.98	6.3386e-06
MSMEG1314	0.720075	0.000669564	0.483842	1.30355e-09	0.765134	0.176114	0.642832	0.0979109	0.657606	0.0598752
MSMEG1315	1.7796	0.0483616	1.08792	0.553126	1.77217	0.0165288	1.24398	0.426537	1.31208	0.271223
MSMEG1316	0.823736	0.458746	0.818917	0.000684104	0.666164	0.00347096	0.563834	0.0160918	0.633145	0.0126699
MSMEG1317	1.08544	0.663636	1.06422	0.301869	1.20189	0.122711	1.26526	0.258362	1.0281	0.866246
MSMEG1318	0.853615	0.298925	1.59516	0.000226083	1.53711	0.00195272	1.7083	1.13186e-07	1.62028	0.0196586
MSMEG1319	0.628296	0.0032676	0.735494	0.000668046	0.386845	0.00330291	0.371304	0.00191088	0.45578	0.00619521
MSMEG1320	1.15959	0.586733	0.803848	0.0538128	0.987114	0.971351	0.836941	0.461282	0.64878	0.11167
MSMEG1321	0.901688	0.673813	1.22463	6.31129e-05	0.836585	0.435527	0.986645	0.952977	0.813948	0.431361
MSMEG1322	2.28195	0.0135403	1.31349	0.136569	1.07443	0.796372	1.49095	0.106401	0.863459	0.361911
MSMEG1323	0.775325	0.150726	0.892597	0.00263892	0.592662	0.000129951	0.676775	0.0425398	0.601703	0.00285158
MSMEG1324	0.732572	0.00114987	1.01658	0.799319	0.765957	0.23646	0.859198	0.497618	0.629413	0.0805759
MSMEG1325	0.712566	0.0416423	0.963164	0.75215	0.764187	0.00549484	0.888786	0.444261	0.781959	0.322292
MSMEG1326	1.38036	0.000530704	1.10139	0.114733	1.42095	0.00310497	1.65465	0.00460803	1.6144	0.00186268
MSMEG1327
MSMEG1328	0.445681	5.86493e-06	0.862821	0.000934091	0.591502	3.0121e-05	0.544113	2.36344e-05	0.568577	0.00021369
MSMEG1329	2.0193	5.31471e-07	1.1394	0.0807098	1.57153	0.000126606	1.63521	0.000951273	1.69089	6.06189e-05
MSMEG1332	1.1252	0.348656	1.1068	0.1633	1.04577	0.59876	1.17534	0.0733992	1.0747	0.55956
MSMEG1333	2.85379	8.01485e-05	1.51372	0.000118651	2.24204	0.000104618	2.89017	1.10535e-05	3.00135	1.59475e-06
MSMEG1334	1.25672	0.395969	1.36418	0.0340395	0.70532	0.000142619	0.84712	0.0854877	0.921654	0.604061
MSMEG1335	0.751639	0.0134906	1.49386	6.18781e-06	0.971451	0.701573	1.16082	0.232421	1.08293	0.429578
MSMEG1337	1.98444	0.00558153	2.60578	2.75139e-05	0.945597	0.541028	1.05822	0.658216	1.07293	0.775218
MSMEG1338	0.744522	0.0333167	1.20386	2.66789e-06	0.874718	0.000955701	0.850774	0.41794	1.17672	0.478248
MSMEG1339	1.04351	0.573579	1.96232	2.54781e-05	1.14298	0.0646374	1.70584	0.00196627	1.54118	0.00788366
MSMEG1340	1.37758	0.108726	1.55833	0.114615	0.790448	0.260023	0.874641	0.525659	0.812951	0.0625709
MSMEG1341	1.62689	0.000644579	1.43984	0.0329692	1.20576	0.115107	1.21711	0.0062732	1.17387	0.255955
MSMEG1342	1.03046	0.858655	0.999363	0.988522	0.75739	0.124266	0.954865	0.723602	0.656384	0.0639483
MSMEG1343	1.08052	0.670429	1.29191	0.000746252	1.44444	6.1835e-06	1.66913	0.000263308	1.536	0.00184915
MSMEG1344	0.851586	0.307635	0.659347	4.68743e-08	0.514052	8.15421e-05	0.586437	0.000575394	0.516005	0.00576419
MSMEG1345	0.591547	0.151969	1.18302	0.190523	1.43374	0.253087	1.50629	0.20544	3.12764	0.00507138
MSMEG1346	0.921496	0.663041	1.39583	4.89201e-05	1.41665	0.00984357	1.43497	0.000317731	1.77172	0.00613341
MSMEG1347	0.439358	0.00188839	0.921026	0.399632	0.874603	0.258703	0.725868	0.12215	0.730965	0.113852
MSMEG1348	1.05913	0.565586	1.31532	3.85945e-05	1.13006	0.412614	1.16129	0.37875	0.937058	0.404221
MSMEG1349	0.778632	0.145398	0.975773	0.612527	0.773577	0.140601	0.710735	0.101309	0.820339	0.301059
MSMEG1350	1.05819	0.79187	0.923594	0.0703505	0.687408	0.000887618	0.622404	0.00227536	0.694959	0.0049005
MSMEG1351	1.01875	0.909735	0.964568	0.734384	0.862519	0.314259	0.696669	0.028651	0.438263	0.00192874
MSMEG1352	1.94213	0.00977826	1.11532	0.198099	1.43825	6.8255e-05	1.45568	0.0179702	1.49579	9.02937e-05
MSMEG1353	1.01578	0.807727	0.960077	0.366177	0.945911	0.556434	0.869722	0.21055	0.984293	0.874003
MSMEG1354	0.703591	0.000154594	0.574265	0.00102262	0.456784	0.00733697	0.533466	0.0352586	0.420931	0.00108848
MSMEG1355	0.866892	0.242995	1.21646	0.0226621	1.00113	0.976994	1.00924	0.849632	0.850605	0.000461341
MSMEG1356	1.00612	0.979417	1.06432	0.474072	1.15911	0.417762	1.37919	0.059286	1.20714	0.293947
MSMEG1357	1.42109	0.173366	1.51256	0.00046655	0.899111	0.236356	1.07509	0.408486	1.24475	0.114304
MSMEG1358	1.55993	0.0898301	1.89417	6.04357e-05	1.51573	0.0113711	2.04831	0.00126985	2.6554	1.14359e-06
MSMEG1359	0.50363	0.00141744	0.862139	0.155751	0.765112	0.168905	0.776238	0.297937	0.769016	0.329035
MSMEG1360	3.51439	0.00301561	1.82893	0.00246339	1.90856	0.0376858	1.97995	0.00603201	2.52306	0.00471447
MSMEG1361	1.26845	0.0215727	1.30967	0.00715245	1.18269	0.0761645	1.78676	0.000262668	1.64837	0.000147821
MSMEG1362	1.34341	0.109557	1.0187	0.487794	1.40969	0.0350618	1.26324	0.235589	1.34245	0.00437593
MSMEG1363	0.784398	0.0149292	1.35242	0.0993191	0.32719	0.000979279	0.447992	0.0194473	0.334437	0.000925668
MSMEG1364	2.17749	0.0196698	1.00858	0.914206	1.22571	0.319374	1.1648	0.368664	1.14592	0.521594
MSMEG1365	1.02827	0.86294	0.840853	0.0282246	1.67115	0.000102137	1.59279	0.000312894	1.7974	1.09979e-05
MSMEG1366	1.47112	0.0432806	0.866664	0.195675	1.44899	0.016897	1.34177	0.0496252	1.45407	0.00118557
MSMEG1367	0.831446	0.240554	0.908972	0.356335	0.753792	0.0705028	0.712906	0.00319881	0.724383	0.175557
MSMEG1368	0.616143	0.022151	0.918841	0.128148	0.734311	0.198473	0.656255	0.222264	0.684808	0.221402
MSMEG1369	0.749636	0.183786	1.20496	0.336362	1.58668	5.9899e-06	1.53476	8.86366e-05	1.72839	1.16224e-05
MSMEG1370	0.674955	0.00834284	1.35109	0.000388301	0.99306	0.856176	0.956988	0.54197	0.935149	0.251449
MSMEG1371	0.981129	0.938928	1.09611	0.443595	0.934346	0.62341	0.89703	0.589581	0.794664	0.111299
MSMEG1372	0.611815	0.0481849	0.800943	0.0283079	0.703968	0.00349074	0.809015	0.25482	0.838154	0.260623
MSMEG1373	1.03567	0.767895	1.23305	7.46156e-05	1.23999	0.00974256	1.29711	0.158649	1.19632	0.0980013
MSMEG1374	1.23717	0.141029	0.902707	0.0253806	1.37584	0.0170189	1.31295	0.0135729	1.45984	0.000210074
MSMEG1375	0.838878	0.177516	1.22648	0.0542592	0.98747	0.834671	1.03364	0.793561	0.830516	0.258512
MSMEG1376	0.778929	0.130242	2.2981	1.27238e-07	1.81435	3.65313e-06	2.09176	8.53772e-06	2.11458	1.20848e-05
MSMEG1377	1.8194	0.00326346	0.908261	0.326357	1.24045	0.289674	1.4596	0.114815	1.03958	0.83194
MSMEG1378	0.686073	0.0259959	0.924301	0.112947	0.962469	0.737533	0.89799	0.144377	0.876921	0.219194
MSMEG1379	0.849479	0.151147	0.902931	0.0181883	0.697593	0.0427755	0.702102	0.0891603	0.674127	0.139258
MSMEG1381	2.29893	3.25796e-07	0.912995	0.0314668	1.83277	8.59209e-07	1.67608	0.00228978	2.21173	0.0111843
MSMEG1382	0.926429	0.602783	0.862923	0.0216779	0.926509	0.375792	0.808872	0.139925	0.811131	0.175587
MSMEG1383	0.665065	0.000804153	1.06577	0.489251	1.1521	0.0130848	0.885575	0.302967	1.05022	0.335203
MSMEG1384	0.690019	0.00697668	0.917599	0.408398	0.898901	0.0956801	0.785175	0.239226	0.773631	0.046707
MSMEG1385	0.622066	0.00333378	1.09932	0.0805704	1.07922	0.54158	1.00534	0.960919	1.00467	0.949854
MSMEG1386	0.651223	0.0599142	0.860462	0.00252801	0.835172	0.104641	0.772953	0.291732	0.691685	0.0991074
MSMEG1387	0.878221	0.382637	1.11079	0.320174	0.922694	0.248979	0.918951	0.436588	0.897253	0.259912
MSMEG1388	0.509486	0.000461709	0.800024	1.29885e-05	0.795273	0.00836771	0.767906	0.0375575	0.719702	0.0774258
MSMEG1389	1.5968	0.0388754	0.944372	0.110994	0.328553	0.0141614	0.539352	0.0899937	0.335115	0.00352681
MSMEG1391	0.675628	0.102116	0.957046	0.619651	0.736856	0.00392782	0.813475	0.184416	0.822325	0.222989
MSMEG1392	0.647675	0.0546906	1.0301	0.381828	0.951303	0.521706	0.803562	0.272429	1.03579	0.824864
MSMEG1393	1.88621	0.0113865	1.66853	0.00190711	0.847487	0.000245289	1.00697	0.922678	0.921885	0.502045
MSMEG1394	1.89688	8.74937e-06	1.38114	0.0477675	1.42819	0.0295537	1.74781	0.000234879	1.81384	5.91418e-06
MSMEG1395	1.41	5.55262e-05	2.26926	5.11096e-05	3.07191	3.44185e-06	4.03754	6.17522e-09	3.90939	1.22928e-07
MSMEG1396	1.25844	0.177334	1.39089	0.000747573	0.817206	0.0922237	1.10955	0.467394	1.37537	0.134765
MSMEG1397	1.98843	0.0286642	1.774	7.29068e-07	1.13572	0.574222	1.29093	0.3297	2.62358	0.00201363
MSMEG1398	0.909302	0.771176	1.46644	1.63293e-07	1.2461	0.0185218	1.19747	0.240822	1.98033	0.00337642
MSMEG1399	1.94701	0.211626	0.934436	0.560628	0.756734	0.0158431	0.810232	0.237312	0.778051	0.252951
MSMEG1400
MSMEG1401
MSMEG1402	2.72253	3.2568e-06	0.929307	0.570948	1.92895	0.00718819	1.42195	0.0580632	1.58364	0.0184596
MSMEG1403	0.917524	0.70218	1.46381	0.040136	1.55285	0.0120257	1.56889	0.000767346	2.02515	1.0111e-07
MSMEG1404	0.818789	0.150562	0.953866	0.149801	1.0002	0.997671	0.855294	0.351397	0.935271	0.750156
MSMEG1405	0.749968	0.0799476	0.912512	0.0177495	0.655607	0.0294151	0.670809	0.162684	0.511778	0.0077059
MSMEG1406	1.51593	0.0728819	0.739235	0.0306968	0.7079	0.220574	0.893071	0.62674	0.556791	0.0763263
MSMEG1407	1.07634	0.306797	0.834232	0.0404658	1.068	0.6746	1.04447	0.792946	1.01625	0.918206
MSMEG1408	0.847422	0.311242	0.51792	6.86593e-07	0.281715	0.000109264	0.399115	0.00154664	0.434102	0.000978011
MSMEG1409	0.903486	0.586041	1.34754	0.0191763	0.872825	0.221001	0.844155	0.314686	0.723661	0.171668
MSMEG1410	0.716086	0.112857	0.951145	0.557151	1.02457	0.631472	1.00416	0.98122	1.17137	0.0677798
MSMEG1411	1.43945	0.2242	0.645347	0.00049503	0.61503	0.0152181	1.05812	0.852375	0.749533	0.281977
MSMEG1412	0.709463	0.1861	0.987178	0.886174	1.07524	0.405451	1.09022	0.317704	0.913263	0.345602
MSMEG1413	0.920272	0.397285	0.749254	0.0129224	1.00664	0.897239	1.03193	0.708263	1.00185	0.960506
MSMEG1414	0.944212	0.754143	0.837456	0.334723	0.828338	0.121525	0.722266	0.0377985	0.788759	0.253848
MSMEG1415	1.80265	0.013238	1.3558	0.00844862	0.938025	0.644052	1.2237	0.22911	0.892932	0.703569
MSMEG1416	1.1648	0.269881	0.844624	0.0122112	1.90331	0.000145337	2.08249	5.01494e-06	2.08883	0.00444476
MSMEG1417	1.29018	0.171114	0.721598	0.000184317	0.42923	1.9178e-07	0.398505	0.00103544	0.30892	0.000246857
MSMEG1418	0.919602	0.542034	0.733356	0.000561325	0.895637	0.181516	0.881793	0.485937	1.10057	0.480551
MSMEG1419	1.04667	0.749157	1.03236	0.559775	1.17282	0.00032095	1.1754	0.0120426	1.56643	0.000262363
MSMEG1420	2.21312	5.13956e-05	0.932996	0.517374	1.76076	0.000161315	1.46977	6.82444e-05	1.37496	0.0144433
MSMEG1421	0.684897	0.0206217	1.1769	0.0887801	0.617173	0.000528101	0.677183	0.0199383	0.756576	0.00280596
MSMEG1422	0.685886	0.0010427	0.734594	0.000500418	0.421754	2.07205e-07	0.475239	6.67731e-05	0.404133	0.000135279
MSMEG1423	1.96341	0.00931258	1.19075	0.0112973	2.29577	4.58895e-07	2.55181	0.000187311	2.04222	0.000569707
MSMEG1424	0.814952	0.0537751	1.05855	0.647274	1.24253	0.060655	1.31981	0.0932291	1.32716	0.00929758
MSMEG1425	0.69228	0.0157819	0.889511	0.432049	0.624942	0.00424577	0.644775	0.0539444	0.533097	0.0148976
MSMEG1426	1.43754	0.0501691	1.15153	0.0958178	3.22677	1.7971e-06	2.10662	1.65438e-06	2.36804	2.73498e-05
MSMEG1427	0.798477	2.19516e-05	0.631481	4.9049e-07	0.854309	0.368599	0.889783	0.585864	0.751263	0.315212
MSMEG1428	1.57211	0.0197847	0.968947	0.795643	1.15737	0.256825	1.21978	0.434049	2.26831	0.0491838
MSMEG1429	0.626148	0.172987	1.20699	0.0802336	1.4323	0.089262	1.74113	0.000814745	1.30661	0.0605933
MSMEG1430	0.731714	0.0651504	1.00424	0.95743	0.789006	0.135348	0.818501	0.299445	1.66074	0.175668
MSMEG1431	1.18791	0.0105837	1.25143	6.55261e-05	0.844554	0.210118	0.994218	0.974345	0.922199	0.71361
MSMEG1432	0.60133	7.14446e-05	0.698923	5.24341e-05	0.577143	3.2938e-05	0.547497	4.34175e-06	0.527681	0.00475831
MSMEG1433	3.4138	0.000387058	1.41091	0.0630445	1.47179	0.0481066	1.93603	3.34931e-05	2.27823	2.29105e-05
MSMEG1434	1.00547	0.975175	1.1674	0.00467462	0.682662	0.0199293	0.873987	0.215712	0.812772	0.0402387
MSMEG1435	1.75184	0.0100413	1.38541	0.0345481	1.53003	0.109654	1.90216	9.95296e-05	1.93489	3.97446e-07
MSMEG1436	0.887898	0.219163	1.04798	0.685195	0.444618	1.19167e-07	0.620653	3.49787e-05	0.608663	3.65762e-05
MSMEG1437	1.31202	0.209267	1.05855	0.252434	0.663823	0.12345	0.65139	0.0445598	0.77548	0.273157
MSMEG1438	4.07054	0.00045627	1.34402	0.001401	1.30962	0.181998	1.81464	7.62082e-05	1.97625	2.76565e-05
MSMEG1439	1.15939	0.143951	1.3598	0.000102112	0.851405	0.187391	1.07099	0.685595	0.94184	0.44868
MSMEG1440	1.36674	0.0116212	1.27704	0.0131652	1.54051	0.000719292	2.08792	2.44787e-07	2.24251	4.1329e-06
MSMEG1441	3.02627	0.00210406	1.6306	0.00782285	1.55185	0.0485015	2.41413	7.25988e-05	2.89039	6.14672e-07
MSMEG1442	1.40107	0.0623977	1.47782	0.0773023	0.741639	0.16207	1.05259	0.696626	1.08067	0.66375
MSMEG1443	0.663572	0.0738529	1.4757	2.60719e-05	0.704433	0.101196	1.00031	0.997276	0.924025	0.354081
MSMEG1444	1.70721	0.00206449	1.17011	0.106489	1.14374	0.00415151	1.18353	0.217006	1.1374	0.37291
MSMEG1445	0.507302	0.000118352	1.13686	0.153116	0.86585	0.016867	0.850713	0.0175678	0.937826	0.494768
MSMEG1446	1.14883	0.652987	1.44011	0.0462732	1.0004	0.997082	1.19754	0.28203	1.11093	0.572389
MSMEG1447	1.32662	0.167563	1.17503	0.0331659	1.46772	0.0140985	1.64393	0.00211553	1.53787	0.00369167
MSMEG1448	1.0348	0.877983	0.804459	0.146593	0.951399	0.811751	1.04487	0.789695	0.786184	0.207692
MSMEG1449	0.731718	0.13134	0.677243	0.00164356	0.574436	0.0108955	0.346842	0.00112728	0.492857	0.00373362
MSMEG1450	1.15013	0.490562	0.978649	0.905188	0.752342	0.327975	1.05269	0.726773	0.812538	0.398637
MSMEG1451	0.577625	0.0168221	1.11683	0.350367	1.31162	0.0975255	1.18959	0.204376	1.21699	0.058889
MSMEG1452
MSMEG1453	0.681234	0.0682635	1.14169	0.0119317	1.11985	0.0412798	0.925057	0.507983	1.02691	0.838974
MSMEG1454	3.41664	0.00015675	1.13774	0.135698	2.00334	8.16299e-05	1.84979	0.00380312	3.25665	0.000271168
MSMEG1455	1.08056	0.0889637	0.889919	0.0739346	1.18591	0.318437	1.26635	0.0701938	1.17174	0.343944
MSMEG1456	0.773062	0.259502	0.710784	0.00167022	0.53262	0.00971262	0.47635	0.00256648	0.519834	0.0260674
MSMEG1457	0.627404	0.00799747	0.743589	0.00369547	0.582331	0.00871131	0.635167	0.0123983	0.718643	0.134622
MSMEG1458	0.835521	0.154282	0.759579	0.00460213	1.53036	0.001249	1.75195	0.0073496	1.78891	0.00453898
MSMEG1459	1.23071	0.0584779	1.11242	0.334083	1.32448	0.272336	1.45209	2.49928e-06	1.39506	0.00463155
MSMEG1460	1.09031	0.654305	0.888453	0.210908	0.832421	0.502727	1.05801	0.836588	1.01043	0.936845
MSMEG1461	1.4235	0.00958381	0.92865	0.44667	1.42015	0.0562849	1.50494	0.0454553	1.77192	0.0516877
MSMEG1462	1.8287	0.0119108	1.28393	0.0286054	0.638741	9.27696e-06	0.761411	0.00112692	0.709265	0.0292372
MSMEG1463	2.36384	0.00468883	1.15398	0.0754236	1.22828	0.117353	1.52689	0.000794216	1.61276	1.90355e-05
MSMEG1464	1.17323	0.245019	1.62595	2.8148e-05	1.03695	0.597151	1.37369	0.00735111	1.33941	0.0153125
MSMEG1465	2.21837	0.0299575	2.23031	0.00858115	0.710429	0.116747	1.06547	0.760194	1.16628	0.431667
MSMEG1466	1.9815	0.000397772	1.51135	0.0242016	1.23001	0.270943	1.64393	0.00280117	1.97081	6.25804e-05
MSMEG1467	1.50663	0.0971232	1.5896	0.00327765	0.845641	0.246806	0.984867	0.918681	1.02618	0.818656
MSMEG1468	1.39867	0.065721	1.13302	0.00780887	1.06	0.494648	1.52387	1.19444e-05	1.79097	0.000823859
MSMEG1469	1.59656	0.000232739	1.42675	0.000247212	1.27666	9.68827e-05	1.47099	0.00643843	1.85062	0.000277231
MSMEG1470	1.03654	0.884029	1.13411	0.368619	0.553485	0.00271219	0.559894	0.000684686	0.657068	0.00116902
MSMEG1471	2.78196	0.00227749	1.64017	0.0204745	0.852538	0.414676	0.884535	0.209227	0.879629	0.278637
MSMEG1472	1.28297	0.0783404	1.00508	0.946995	1.24413	0.214991	1.00984	0.950844	1.27854	0.187643
MSMEG1473	1.32414	0.0545996	1.01746	0.894592	1.04945	0.575997	1.16677	0.288125	1.30202	0.114938
MSMEG1474	1.37845	0.316656	1.04923	0.76723	0.312305	0.00422901	0.152065	1.48209e-06	0.506777	0.0707809
MSMEG1475	0.738896	0.106415	0.80967	0.0163639	0.572602	0.0583585	0.882738	0.391561	0.521939	0.0371261
MSMEG1476	1.17995	0.344343	0.99276	0.890502	1.44908	0.000737035	1.46326	0.053845	1.65008	0.000495161
MSMEG1477	1.41631	0.00718538	0.786543	0.00170953	1.08467	0.710767	0.816245	0.368453	0.79827	0.423918
MSMEG1478	1.03052	0.464081	1.09692	0.379571	1.17363	0.431043	1.2828	0.203983	1.25077	0.43772
MSMEG1479	2.04229	0.00569982	1.15096	0.379532	1.1153	0.757688	1.48949	0.124547	1.06511	0.810266
MSMEG1480	1.25372	0.125015	0.953378	0.0816919	1.25259	0.0448554	1.41894	0.00821674	1.66894	8.50352e-06
MSMEG1482	0.931027	0.742581	0.903015	0.0504878	0.822426	0.131683	0.828544	0.329084	0.864569	0.265627
MSMEG1483	0.888225	0.718783	1.01379	0.91072	0.735071	0.117683	0.84194	0.438851	0.648095	0.0948408
MSMEG1484	1.50346	0.00432547	1.2421	0.110903	0.814163	0.000247093	0.843722	0.186447	0.629263	0.0986782
MSMEG1485	0.901007	0.695155	0.906704	0.223955	3.27674	0.00624513	2.02041	0.077749	1.60944	0.121157
MSMEG1486	1.09821	0.535599	0.982253	0.74886	1.07956	0.741405	1.09492	0.692699	1.2373	0.391598
MSMEG1487	1.059	0.537148	0.91352	0.576048	0.923871	0.533968	0.923283	0.288477	0.901332	0.261971
MSMEG1488	2.06705	6.83232e-07	1.10203	0.132014	1.69681	0.000144394	1.64809	0.000637413	2.0205	2.28772e-05
MSMEG1489	0.469728	0.000168356	0.988367	0.788255	0.955644	0.740772	0.893199	0.1304	0.824237	0.444577
MSMEG1490	1.23358	0.253678	1.0034	0.959859	1.11351	0.345606	0.992127	0.941721	1.06086	0.714508
MSMEG1491	0.916611	0.647419	0.909981	0.462436	0.962754	0.781412	1.00253	0.985792	0.947752	0.749989
MSMEG1492
MSMEG1493	0.875273	0.51106	0.987503	0.855241	1.19107	0.0322237	1.13198	0.225262	1.28639	0.0117152
MSMEG1494	0.480826	1.54989e-05	1.15647	0.168138	1.69381	0.000146056	1.39838	0.0111947	1.51307	0.021767
MSMEG1495	0.786933	0.145743	0.861382	0.408296	0.232709	3.15873e-05	0.392198	0.00095346	0.173127	3.4167e-05
MSMEG1496	1.60986	0.0503526	1.33746	0.065823	1.26156	0.298813	1.22413	0.218522	1.15843	0.597802
MSMEG1497	1.47036	0.0611653	1.6144	0.00902589	1.00983	0.961987	0.961856	0.732761	0.984955	0.956255
MSMEG1498	0.74806	0.0293328	0.943044	0.464815	0.980459	0.796303	0.834863	0.0528064	0.892876	0.296389
MSMEG1499	0.601018	0.0139497	1.02212	0.829268	0.733106	0.0162995	0.667554	0.000365454	0.740319	0.000386246
MSMEG1500	0.972261	0.916382	0.92725	0.537935	0.728452	0.0184346	0.615924	0.0172611	0.94665	0.599761
MSMEG1501	0.528733	0.00464252	0.922733	0.0238841	1.11816	0.192821	1.17549	0.150239	1.14836	0.501691
MSMEG1502	0.529717	1.637e-06	0.698634	0.00091934	0.236967	2.30491e-05	0.233245	1.42873e-05	0.316817	0.00157485
MSMEG1503	2.79483	2.66121e-05	1.30544	0.0147892	2.04582	2.35645e-05	2.21845	2.50012e-06	2.6984	5.29338e-06
MSMEG1504	2.85613	0.00131376	1.05379	0.606609	1.78969	0.0395948	1.50773	0.0727382	1.56512	0.0275907
MSMEG1505	1.10653	0.113788	1.10955	0.375756	1.91672	0.00357164	1.95695	5.48775e-05	1.7001	0.0174961
MSMEG1506	1.53106	0.0182576	1.13958	0.438663	1.07042	0.669036	1.03704	0.640221	1.07119	0.331316
MSMEG1507	1.06199	0.836027	0.440762	0.0020172	0.346943	0.0085887	0.240875	0.00237132	0.140424	5.51482e-06
MSMEG1508	1.00888	0.867168	1.04877	0.752908	1.10689	0.328247	1.17262	0.203082	0.865913	0.276096
MSMEG1509	0.532405	0.00246857	0.763256	0.0104608	0.624968	0.0123972	0.520603	0.0115631	0.705776	0.00886332
MSMEG1510	0.82461	0.305165	1.06134	0.0889516	1.05283	0.400651	0.963868	0.64952	1.01604	0.93713
MSMEG1511	1.39351	0.0333154	1.56216	2.37148e-06	1.86972	7.15716e-08	2.36396	2.4649e-05	2.34543	6.79808e-07
MSMEG1512	1.2336	0.15437	1.08109	0.416706	1.09437	0.480709	1.00718	0.967427	1.02371	0.903211
MSMEG1513	2.12282	0.000958289	1.11587	0.160942	0.536442	0.00151783	0.774875	0.0845959	0.498488	0.000210388
MSMEG1514	2.34213	0.000248415	1.22094	0.00267731	2.12936	8.96062e-05	2.59404	5.77926e-08	2.16637	0.000184538
MSMEG1515	1.15405	0.639947	0.859282	0.156592	0.978914	0.923168	0.87296	0.658199	0.778607	0.339368
MSMEG1516	1.3698	0.108303	1.06466	0.153507	1.70207	4.31329e-06	1.72934	0.00130045	1.786	1.13558e-06
MSMEG1517	2.40496	0.01892	1.09785	0.0785941	1.29734	0.0563514	1.62245	0.0699889	1.47427	0.0895803
MSMEG1518	2.88149	0.0016317	2.02522	6.44607e-05	1.56942	0.000954583	2.54285	0.00014626	2.47583	7.27791e-06
MSMEG1519	2.27795	9.03101e-05	0.962318	0.84916	0.75732	0.0899417	0.941081	0.737483	1.17196	0.307338
MSMEG1520	1.67397	2.71446e-06	1.54192	0.000727889	1.13898	0.315398	1.56715	0.00832449	1.62041	0.000620483
MSMEG1521	1.71385	0.00509757	1.03229	0.640256	1.00219	0.986945	1.28882	0.204142	1.31255	0.0173094
MSMEG1522	1.2216	0.121285	1.70676	3.60507e-06	1.4687	0.00766821	2.02581	0.00081742	1.82946	8.5647e-07
MSMEG1523	1.59842	0.0283414	0.959324	0.748155	1.11527	0.520112	1.17103	0.242115	1.31526	0.00399928
MSMEG1524	1.12942	0.44434	1.39607	0.0130844	0.65318	5.42606e-06	0.669792	1.41131e-07	0.713131	0.00146144
MSMEG1525	1.05623	0.792749	0.977351	0.859408	0.873077	0.637624	1.00255	0.989069	0.934705	0.820071
MSMEG1526	0.658102	0.00442531	1.14724	0.0546922	0.937361	0.383809	1.11652	0.153883	1.08825	0.636136
MSMEG1527	1.45541	4.77117e-06	1.61918	0.000513094	1.21979	2.47304e-06	1.41319	0.00063549	1.31627	0.130849
MSMEG1528	1.13525	0.260636	1.19084	0.190001	1.00684	0.957817	0.959572	0.83559	1.05733	0.769677
MSMEG1529	1.61834	0.0077049	1.22781	0.045166	0.985927	0.807051	0.988499	0.923804	0.990152	0.858669
MSMEG1530	1.22252	0.16541	1.02839	0.717294	1.12039	0.0184985	0.97881	0.691771	1.02565	0.869897
MSMEG1531	1.00588	0.969239	0.9509	0.612321	1.15032	0.0241508	1.07432	0.598034	1.13219	0.26085
MSMEG1532	1.70145	0.077455	0.891013	0.349869	2.68299	0.00625822	2.13029	0.0391625	2.89009	0.00215403
MSMEG1533	1.09207	0.520005	0.847912	0.161598	1.2004	0.202616	1.17271	0.36845	1.09373	0.410839
MSMEG1534	1.84375	0.0175503	1.5362	0.00218707	1.37179	0.0270835	1.70903	0.0135841	1.51905	0.0134905
MSMEG1535	0.904032	0.662863	0.552997	3.30706e-05	0.534505	0.067926	0.579299	0.00524837	0.383238	0.0112032
MSMEG1536	0.979832	0.935835	1.05523	0.555318	1.50672	3.31916e-05	1.3816	0.00044785	1.97691	7.3053e-05
MSMEG1537	1.05309	0.616216	0.877668	0.195331	1.77127	0.058413	1.19108	0.0409523	2.98625	0.00487932
MSMEG1538	0.669672	0.116212	0.858056	0.250446	1.26431	0.0764352	1.55153	0.0323358	1.57888	0.028168
MSMEG1539	5.85623	5.60201e-06	2.71281	6.76354e-05	2.40978	4.30445e-06	2.49133	7.52558e-05	2.68107	6.75104e-06
MSMEG1540	0.507665	4.66819e-05	0.986335	0.937007	1.23868	0.0238667	1.16624	0.155838	1.19021	0.208532
MSMEG1541	1.49893	0.0943453	1.32911	0.0176664	0.910784	0.800502	1.45431	0.157659	0.61611	0.00659419
MSMEG1542	0.712579	0.310707	1.07963	0.442091	1.02344	0.937952	0.868735	0.606539	0.847411	0.375383
MSMEG1543	0.924872	0.628695	0.688424	2.89717e-06	0.508123	0.0793051	0.674178	0.0425657	0.665617	0.048393
MSMEG1544	0.974447	0.87247	1.04079	0.539593	1.66773	0.0189497	0.931492	0.564777	0.959907	0.541986
MSMEG1545	1.2702	0.199955	1.02387	0.821393	0.892881	0.208483	0.878981	0.140348	0.858041	0.211921
MSMEG1546	0.822066	0.24273	1.02388	0.579411	0.741827	0.0212118	0.814601	0.155014	0.767107	0.186881
MSMEG1547	0.730821	0.130344	0.986083	0.888275	0.901405	0.372854	0.811219	0.105212	1.03105	0.901012
MSMEG1548	0.612728	0.00212279	0.907493	0.232235	1.06843	0.58733	0.998419	0.987725	0.99656	0.978882
MSMEG1549	0.96379	0.736477	0.945168	0.33275	0.869361	0.000254247	0.802329	0.218435	0.683088	0.0253213
MSMEG1550	1.38719	0.0839854	0.986996	0.908536	1.66907	0.000244621	1.76502	0.0129232	1.38984	0.239005
MSMEG1551	0.856502	0.444011	0.816569	0.0190382	1.18342	0.0771562	1.04176	0.732404	1.19592	0.268393
MSMEG1552	1.62347	0.116725	1.44939	0.00548643	1.34432	0.0286602	1.04413	0.843847	2.71166	0.0287667
MSMEG1553	1.46869	0.15151	1.79177	0.00134618	1.04265	0.784748	1.27874	0.0201595	1.27711	0.109415
MSMEG1554	1.21612	0.264097	1.27533	0.221809	0.618882	0.0333715	0.785215	0.116671	0.626046	0.131887
MSMEG1555	1.77622	0.0174076	1.05762	0.5908	1.55346	0.00102979	1.70362	0.000220908	1.80919	4.10651e-05
MSMEG1556	1.76139	0.0123665	1.10114	0.32501	1.24573	0.055293	1.14123	0.192132	1.31162	0.048922
MSMEG1557	1.44405	0.154274	1.11124	0.247556	1.33518	0.152719	1.35155	0.000619434	1.53022	3.05906e-05
MSMEG1558	1.15496	0.190555	1.03847	0.679277	1.36937	0.00485206	1.28976	0.026621	1.31775	0.0454687
MSMEG1559	2.50422	0.00328403	1.12738	0.215465	1.99159	0.0114125	2.04852	0.00872143	2.20129	4.06736e-07
MSMEG1560	0.653726	0.0639422	0.851756	0.0532969	0.730188	0.169689	0.775726	0.185469	0.708677	0.0530856
MSMEG1561	0.658902	0.17002	1.22803	0.0398774	1.52384	0.00846628	1.79545	0.0151696	1.74613	0.0248597
MSMEG1562	0.994962	0.986126	0.599102	0.00393429	0.426038	0.0264798	0.512905	0.0175756	0.575602	0.129034
MSMEG1563	1.21568	0.144992	0.8877	0.385901	1.07805	0.338312	1.05351	0.329911	1.10156	0.385186
MSMEG1564	0.615346	0.0022781	1.00194	0.972194	0.943016	0.0912205	0.836381	0.226292	0.863051	0.120244
MSMEG1565	1.1656	0.397547	0.719187	7.82007e-07	0.593967	0.0123534	0.486046	0.0350891	0.515677	0.00681048
MSMEG1566	0.920981	0.723272	1.17864	0.00117979	1.3017	4.4464e-05	1.44408	0.00516245	1.25744	0.000154289
MSMEG1567	0.402005	0.000281127	0.606834	6.2537e-06	0.424353	0.000451372	0.372559	4.02162e-05	0.620118	0.00382891
MSMEG1568	0.787929	0.00184005	1.05596	0.399888	0.880858	0.614203	1.03269	0.868895	0.649496	0.147457
MSMEG1569
MSMEG1570	1.60527	0.195678	0.930974	0.45575	0.669469	0.000451512	0.684688	0.000131851	0.676821	0.0937367
MSMEG1571	0.514525	0.0051896	0.767609	0.0231942	0.297291	0.000792349	0.672141	0.101351	0.274084	1.20318e-05
MSMEG1572	2.14765	0.018764	1.3174	0.0585221	1.24766	0.25458	1.0483	0.811973	0.936336	0.827769
MSMEG1573	0.895838	0.302538	0.864263	0.346712	0.554669	0.0919775	0.831774	0.28946	0.510509	0.0393704
MSMEG1574	1.72628	0.00110676	0.90702	0.379771	0.672584	0.00280579	0.566689	0.00333946	0.489408	0.00047846
MSMEG1575	1.31635	0.0046365	1.04286	0.561396	1.04546	0.593709	1.02189	0.818044	0.956272	0.214448
MSMEG1576	1.1149	0.242351	0.872653	0.428393	0.496532	0.0349049	0.49634	0.0354081	0.348279	0.00217389
MSMEG1577	1.50047	0.00454529	1.0546	0.17069	1.33047	0.000833004	1.27242	0.0354877	1.29045	0.0336903
MSMEG1579	0.8898	0.562457	1.00717	0.940584	1.18476	0.000554855	1.19871	0.0400714	1.11588	0.379586
MSMEG1580	0.722819	0.000236427	1.15871	0.134827	0.814349	0.000190558	0.844599	0.144212	0.787001	0.0238662
MSMEG1581	1.1244	0.601985	1.07219	0.298576	0.826975	0.00254507	0.887512	0.38148	0.913519	0.0589027
MSMEG1582	1.34342	0.0959823	0.890372	0.410572	1.12919	0.281451	1.01361	0.855971	1.04267	0.720137
MSMEG1583	0.498486	6.89639e-05	0.991117	0.952221	0.563146	2.98012e-06	0.59983	0.0453047	0.65172	0.000145586
MSMEG1584	1.31694	0.0908822	0.97447	0.473253	1.35624	0.201605	1.51412	0.0004504	1.28959	0.0828948
MSMEG1585	0.506696	0.00228179	0.958154	0.420517	1.04238	0.430968	0.921813	0.563288	0.942773	0.647719
MSMEG1587	1.12818	0.66571	1.1237	0.0241494	1.25753	0.000665484	1.16235	0.39104	1.29007	0.00122491
MSMEG1588	1.89429	0.010028	1.0267	0.856678	1.12815	0.753741	0.847601	0.54903	0.644233	0.0939757
MSMEG1589	3.31242	0.000379837	3.43937	0.00124819	1.25742	0.369192	1.40918	0.0128279	1.31468	0.260906
MSMEG1590	1.15808	0.493188	0.978586	0.584655	0.868905	0.0480667	0.826701	0.139355	0.788633	0.0557954
MSMEG1591	0.65113	0.049865	0.554051	0.000359697	0.430465	0.000187257	0.354171	0.000832761	0.480445	0.00181448
MSMEG1592	0.474554	0.000315256	0.966958	0.79881	8.21464	6.84105e-05	2.04912	2.35618e-07	5.42453	3.03804e-05
MSMEG1593	0.416022	0.000496829	0.690437	0.000352019	0.655212	0.0119463	0.587964	0.0417476	0.45174	0.00072469
MSMEG1594	0.743604	0.12721	0.996336	0.967505	1.03933	0.757859	1.14667	0.121345	1.04095	0.675709
MSMEG1595	0.895196	0.679462	1.14105	0.0729525	0.872754	0.413489	0.879561	0.4264	0.830551	0.39264
MSMEG1596	0.669468	0.000140273	1.29593	0.00260073	1.0721	0.720208	1.04295	0.788647	0.956989	0.609885
MSMEG1597	0.849764	0.221611	1.17074	0.0773138	1.4113	0.00294302	1.47595	0.00264681	1.57118	0.00171967
MSMEG1598	1.02677	0.899016	1.20627	0.267539	0.964231	0.873201	1.15133	0.535083	1.05966	0.648888
MSMEG1599	0.920299	0.580904	0.967336	0.834515	0.889379	0.526399	1.28226	0.111822	0.982298	0.926224
MSMEG1600	0.990788	0.969976	0.720914	0.0117601	0.425143	0.00144848	0.389559	0.00010036	0.598795	0.130739
MSMEG1601	1.43734	0.0330815	0.863171	0.331591	0.855656	0.225056	0.880374	0.521549	0.871118	0.542494
MSMEG1602	1.39084	0.0306463	0.945666	0.675367	0.901826	0.46043	0.883336	0.4914	0.985927	0.909812
MSMEG1603	1.39146	0.133729	1.12116	0.0290827	1.18664	0.336118	1.06583	0.620815	0.831147	0.371091
MSMEG1604	0.602027	0.0623488	1.03956	0.501767	1.07258	0.458919	0.943957	0.62229	0.91507	0.326877
MSMEG1605	0.655057	0.159617	0.699782	0.0410702	0.324404	0.00670894	0.494992	0.00351075	0.265808	0.000590607
MSMEG1606	0.473095	0.000110395	1.00076	0.991221	2.08901	0.00266342	1.34674	0.000702483	1.91854	0.00309194
MSMEG1607	1.82264	0.00355776	1.1455	0.391964	0.877164	0.275129	0.956091	0.616869	0.909003	0.121921
MSMEG1608	2.81676	0.000219422	1.18596	0.0354419	0.658577	0.0139753	0.720207	0.138411	0.687215	0.0274233
MSMEG1609
MSMEG1610	0.474445	0.00245667	1.0872	0.0472961	1.00233	0.986441	0.878227	0.35492	0.842333	0.179768
MSMEG1611	0.497162	0.000137484	1.12131	0.00681392	1.20013	0.00101583	1.06808	0.352858	1.06575	0.347242
MSMEG1612	0.804422	0.319775	1.17338	0.299094	0.629708	0.0853176	0.648619	0.139166	0.723983	0.141246
MSMEG1613	1.14758	0.545516	1.25452	0.0369064	1.59057	0.000600163	1.5497	0.0271304	2.29927	0.000829481
MSMEG1614	0.874174	0.393461	1.14455	0.446692	0.625068	0.00114937	0.668181	2.35043e-05	0.530956	0.000431827
MSMEG1615
MSMEG1616	1.25609	0.262807	1.20002	0.108	1.27702	0.00126084	1.168	0.364695	1.44757	0.123275
MSMEG1617	1.10053	0.430848	1.20487	0.00125335	1.43949	0.000474362	1.38418	0.00308701	1.38792	0.0018453
MSMEG1618	0.999983	0.999711	1.27499	5.5523e-06	0.817114	0.51322	1.2281	0.480125	0.831969	0.396534
MSMEG1619	0.684944	8.05415e-06	0.925515	0.00320735	0.498286	0.0617122	0.649688	0.0225116	0.510784	0.00729207
MSMEG1620	1.58858	0.0123753	1.10794	0.38859	0.93225	0.369506	0.857175	0.270467	0.890092	0.177585
MSMEG1621	1.10282	0.445195	0.918454	0.488449	1.11188	0.511084	1.27437	0.258492	1.50377	0.0264472
MSMEG1622	0.673024	0.100928	0.552005	0.000416936	0.561109	0.102463	0.560414	0.0673959	0.156567	1.45906e-06
MSMEG1623	0.640566	0.0303165	0.90356	0.489897	0.567754	1.23392e-05	0.528294	3.24153e-07	0.577139	2.4512e-06
MSMEG1624	0.873814	0.362102	0.554373	0.000300406	0.521004	0.0162941	0.362221	0.000868165	0.390265	0.000173211
MSMEG1625	1.44358	0.0228382	1.13604	0.179323	1.45409	0.000304646	1.95824	0.00294219	1.83213	2.04651e-05
MSMEG1626	0.61367	0.0121076	1.25643	0.0635588	1.44963	0.00119395	1.31131	0.000189621	1.53226	5.36214e-05
MSMEG1627	2.89325	0.00104102	1.44951	0.101879	1.33199	0.390066	1.602	0.0409089	1.09586	0.782446
MSMEG1628	1.03711	0.260044	1.18846	0.0923788	0.738244	0.0827272	0.83187	0.452417	0.707683	0.0535205
MSMEG1629	0.812579	0.458616	1.27793	0.0323424	0.939271	0.778201	0.845542	0.0365623	0.866499	0.541152
MSMEG1630	1.16082	0.1446	0.86286	0.227669	0.572642	0.17636	0.689898	0.111024	0.294523	0.00125132
MSMEG1631	0.860042	0.0126247	1.12123	0.0322033	0.882786	0.634209	0.889924	0.624069	0.938322	0.702679
MSMEG1632	0.861034	0.0595561	0.848154	0.166457	0.580754	0.00567311	0.602084	0.0535107	0.525251	0.00100214
MSMEG1633	0.845164	0.00214832	0.796512	3.85965e-05	0.596776	0.0554746	0.566333	0.0484242	0.460518	0.00134422
MSMEG1634	0.481633	0.0001045	1.205	0.00118261	1.02602	0.900893	1.18636	0.000185154	0.962384	0.864041
MSMEG1635	0.400675	0.000660499	1.02033	0.504245	0.847813	0.00508739	0.896877	0.457594	0.887998	0.22672
MSMEG1636	4.03701	6.11233e-07	1.11666	0.238345	2.3156	1.11952e-05	2.47265	1.10433e-07	3.21328	1.96144e-07
MSMEG1637	0.965273	0.704729	0.756368	0.0431297	0.595158	0.0496276	0.867198	0.531163	0.572116	0.0824383
MSMEG1638	0.921387	0.596036	0.82356	0.000190454	0.884236	0.545998	0.719068	0.198851	0.651683	0.0960881
MSMEG1639	1.5687	0.000692765	1.32401	4.71533e-05	1.71634	2.09868e-05	1.89734	0.000466032	1.56749	0.00534451
MSMEG1640	0.697225	0.0966519	1.28543	3.45452e-06	0.885864	0.49849	1.23066	0.204747	1.17989	0.283937
MSMEG1641	0.703013	0.163497	0.561477	0.000268285	0.943185	0.673356	0.839968	0.275139	0.6932	0.0693513
MSMEG1642	0.545454	0.00197758	0.77859	0.0355738	0.519343	0.0165775	0.428352	0.00677875	0.44888	0.007331
MSMEG1643	0.5509	0.00741765	1.23188	0.386931	1.0888	0.416275	1.16028	0.229806	1.15561	0.0563333
MSMEG1644	0.331557	0.00374397	0.814745	0.0048466	1.00512	0.947337	0.759069	0.202797	0.946128	0.696967
MSMEG1645	1.17113	0.284889	0.992283	0.672823	1.05352	0.284861	0.8483	0.1934	0.912714	0.449685
MSMEG1646	1.81852	0.0109385	0.91353	0.456946	0.790776	0.287321	0.569774	0.0397848	0.670294	0.0662909
MSMEG1647	0.940506	0.786877	0.905169	0.185838	1.23869	0.000532938	1.28249	0.0152452	1.21198	0.0691867
MSMEG1648	0.984041	0.91313	0.891004	0.16077	1.01948	0.903748	0.930537	0.790736	1.01002	0.949767
MSMEG1649	0.827534	0.398233	1.12961	0.0111164	0.982624	0.911032	0.935214	0.557089	0.91639	0.553783
MSMEG1650	1.24007	0.223531	0.982965	0.84496	1.31091	0.0933248	1.3483	0.0842533	2.04603	0.000417229
MSMEG1651	0.674639	0.087648	1.2533	0.000119031	1.46671	0.00316928	1.37956	4.47903e-06	2.14267	0.00219673
MSMEG1652	1.13997	0.29916	1.13131	0.329327	0.853852	0.00900554	1.10698	0.159203	1.07839	0.124048
MSMEG1653	1.19901	0.211933	0.91582	0.0470553	1.37842	3.61588e-06	1.48264	0.00512251	1.72022	0.00464976
MSMEG1654	0.5464	0.000173126	1.63159	2.43286e-06	1.51403	0.00213275	1.60575	4.83594e-05	2.74665	0.00268851
MSMEG1655	1.25465	0.208903	1.21689	0.0200297	1.63216	1.2427e-05	1.82433	0.00364857	3.93416	0.00123006
MSMEG1656	2.27553	0.00087609	0.972256	0.668335	0.967485	0.912912	1.08779	0.797273	0.672974	0.13131
MSMEG1657	1.85137	0.00100031	0.758485	0.0130075	0.94218	0.772164	0.875129	0.609839	1.07111	0.80104
MSMEG1658
MSMEG1659	2.1808	0.000624313	1.53206	0.0020699	1.57879	0.0716682	1.86344	0.0373554	1.73977	0.00795712
MSMEG1660	1.56557	0.010676	1.07077	0.56891	1.2032	0.211805	1.14258	0.448898	2.51732	0.0206324
MSMEG1661	1.01073	0.932085	0.898185	0.147966	2.4759	0.00902435	1.42916	0.000210794	1.68566	2.90308e-06
MSMEG1662	0.475601	0.0215185	1.14879	0.0111504	1.85577	0.0170482	1.56992	0.00731231	1.42159	0.00688397
MSMEG1663	1.09678	0.556299	1.06905	0.579718	1.10242	0.72324	1.18348	0.407737	0.876358	0.661892
MSMEG1664	0.832844	0.346427	1.12151	0.12815	1.42848	1.93993e-05	1.51389	0.00163775	1.46401	0.00190627
MSMEG1665	2.38999	3.6141e-07	1.19153	0.00920517	1.6242	0.0320766	1.85093	0.000567611	2.1499	5.93726e-06
MSMEG1666	0.805594	0.160756	0.726989	0.00027314	0.356691	0.000396741	0.414666	0.0112929	0.237602	5.18273e-08
MSMEG1667	2.38514	0.00226853	1.34501	0.0173711	0.968828	0.589195	1.00332	0.985232	0.967214	0.836519
MSMEG1668	2.31438	0.00684914	1.45603	0.00294445	2.32453	0.00156355	3.07835	3.58152e-06	3.39749	0.000166124
MSMEG1669	4.22301	0.00053864	1.68911	0.00289683	2.91016	2.18118e-07	3.48225	3.25455e-07	4.3337	1.0512e-06
MSMEG1670	1.55394	0.0150433	0.862733	0.481568	1.4326	0.0383744	1.25749	0.0632871	1.68657	0.151067
MSMEG1671	1.41342	0.395999	0.60628	8.86173e-05	1.04922	0.896077	0.801166	0.496171	0.566718	0.0829626
MSMEG1672	1.1013	0.28807	0.812979	0.00333397	0.716246	0.235352	0.706072	0.0483126	0.819879	0.351657
MSMEG1673	1.55318	0.0169762	0.877431	0.195447	0.828716	0.00263258	0.681322	0.00783654	0.814267	0.00118487
MSMEG1674	0.344977	0.0343442	0.680962	7.82624e-05	0.854179	0.390184	0.585779	0.0539632	0.675873	0.130942
MSMEG1675	0.713833	0.0133786	0.844808	0.00109307	0.638602	0.000673423	0.574254	0.000148308	0.486297	0.000503479
MSMEG1676	0.61936	0.0134562	1.17525	0.201092	1.36762	0.0107308	1.46992	0.011056	1.34443	0.0101462
MSMEG1677	1.69221	0.000176853	1.48244	6.5751e-06	1.03686	0.670112	1.13917	0.0533486	0.965704	0.589829
MSMEG1678	0.689793	0.0175602	1.11509	0.172573	0.860755	0.000728525	0.929818	0.142391	0.889162	0.0040803
MSMEG1679	0.862472	0.237466	1.17475	0.0993973	0.632765	0.00184695	0.693151	0.000361677	0.699845	0.0350334
MSMEG1680	1.94166	0.00394257	0.938976	0.46761	1.28369	0.228983	0.883173	0.593623	1.56126	0.111343
MSMEG1681	1.07185	0.720404	1.80566	0.00151376	0.528376	0.0081521	0.665661	0.0319758	0.765981	0.102278
MSMEG1682	0.550315	0.00117491	0.692063	3.93416e-06	0.514448	2.5084e-05	0.420204	3.57346e-05	0.399904	3.26371e-07
MSMEG1683	0.967449	0.816619	1.31964	0.0783657	1.00141	0.99244	0.99511	0.971953	0.884879	0.182287
MSMEG1684	1.09959	0.591603	0.743243	0.109473	0.592424	0.0142153	0.438265	0.00557451	0.381184	0.00194723
MSMEG1685	0.962227	0.821418	1.16259	0.174267	0.829071	0.0237111	0.832669	0.137741	0.799835	0.0321352
MSMEG1686	0.477889	0.000137823	0.667752	2.11373e-06	0.724805	0.125889	0.711303	0.153643	0.633357	0.0152582
MSMEG1687	1.19432	0.316372	0.82496	0.019704	1.04003	0.59118	0.932498	0.310964	0.989592	0.910852
MSMEG1688	1.14718	0.547445	1.05663	0.625539	1.18704	0.313881	0.88821	0.499834	0.945701	0.790815
MSMEG1689	2.35791	5.72999e-07	1.05847	0.317304	1.81567	8.48588e-05	1.53417	0.00206295	1.80707	6.58346e-05
MSMEG1690	1.0666	0.666475	1.01972	0.876694	0.415687	0.0190217	0.831574	0.390246	0.393833	0.0240722
MSMEG1691	0.640741	0.000573526	0.922164	0.492603	0.49669	0.0102857	0.434445	0.00674778	0.602079	0.022357
MSMEG1692	2.36754	0.00338747	1.03274	0.572999	1.86844	0.00116165	1.76818	4.4211e-07	1.97454	1.24361e-05
MSMEG1693	1.614	0.0114929	1.90291	0.00384791	0.799416	0.00511448	0.96598	0.337821	0.953241	0.41865
MSMEG1694	0.528255	0.020133	1.25321	0.000684963	1.47339	0.00238834	1.53197	9.14431e-06	1.51837	5.74908e-05
MSMEG1695	1.25115	0.319783	1.16204	0.235263	0.892213	0.720151	0.969035	0.907877	0.793475	0.349995
MSMEG1696	0.725862	0.000230301	0.893854	0.147478	0.820738	0.211205	0.725704	0.0762067	0.820968	0.15757
MSMEG1697	0.920137	0.632544	1.10733	0.153286	0.966421	0.36688	0.935645	0.685098	0.928804	0.454472
MSMEG1698	2.4286	0.00837479	1.19695	0.130795	0.981539	0.608864	1.00708	0.74119	0.862776	0.0511847
MSMEG1699	1.10603	0.239934	1.04032	0.304231	1.14131	0.402715	1.00103	0.996425	0.910738	0.712587
MSMEG1700	0.875038	0.280623	0.901312	0.481029	1.57615	0.0202981	1.73938	1.29209e-05	1.43857	0.101975
MSMEG1701	0.926738	0.467907	0.549104	0.00343526	0.555599	0.00335551	0.519817	0.000601863	0.724639	0.278137
MSMEG1702	1.40456	0.188521	1.20404	0.0010279	1.18538	0.119242	0.915069	0.721052	1.0508	0.80521
MSMEG1703	1.01339	0.945149	0.927532	0.248827	0.876278	0.363155	0.756622	0.299766	0.573459	0.00848735
MSMEG1704	1.08138	0.695175	1.32348	7.29766e-07	1.14655	0.0171896	1.29898	0.17947	1.06642	0.144211
MSMEG1705	0.721993	0.141187	0.826458	0.0488641	0.467954	0.00933012	0.581892	0.0277455	0.342878	0.00312778
MSMEG1706	1.70235	0.0162108	1.43513	0.0663321	1.40312	0.000575068	1.51374	0.00132895	1.22033	0.0292967
MSMEG1707	1.81653	0.00520455	1.04066	0.259348	1.70267	0.00619543	1.66184	0.000634486	1.94136	0.000402391
MSMEG1708	1.54368	0.00427772	0.95743	0.630476	1.74182	0.0426484	1.37441	0.0995385	1.56739	4.25811e-05
MSMEG1709	1.19406	0.253889	0.85662	0.178032	1.2923	0.0480603	1.04261	0.742993	1.30139	0.000121377
MSMEG1710	0.572055	0.00155752	0.957	0.0214074	0.801594	0.000298835	0.757498	0.0955688	0.81454	0.0545542
MSMEG1711	1.30462	0.0534879	0.786064	0.00547727	1.32147	0.0525124	1.34664	0.138148	1.42777	0.00512964
MSMEG1712	1.0588	0.69498	1.37187	0.0927389	0.915943	0.35682	0.917906	0.504112	0.996182	0.963328
MSMEG1713	1.10618	0.49261	0.859608	0.0519412	0.480513	5.94623e-05	0.540706	0.00915742	0.41067	0.000782499
MSMEG1714
MSMEG1715	0.919545	0.747477	0.826225	0.0258368	0.739674	0.029702	0.729663	0.10015	0.722347	0.0456795
MSMEG1716	0.873916	0.574171	1.08387	0.527361	0.686397	0.215205	1.0191	0.930425	1.01214	0.960705
MSMEG1717
MSMEG1718	0.647853	3.93766e-06	0.665004	1.96883e-08	0.447893	0.00100849	0.318858	6.06469e-05	0.343269	4.00079e-05
MSMEG1719	1.0669	0.775823	0.708709	0.0078966	1.48634	0.221037	0.754888	0.00141921	1.09825	0.783756
MSMEG1720	1.04458	0.894347	0.919665	0.0455947	0.669663	0.0816268	0.469036	0.023166	0.564354	0.0273853
MSMEG1721
MSMEG1722
MSMEG1723	2.44456	0.0148962	1.35099	0.0159638	1.83974	0.00048337	2.08318	0.000216378	2.19334	8.43191e-06
MSMEG1724
MSMEG1725
MSMEG1726	1.81855	3.33882e-05	1.30919	0.00186718	1.68482	0.0263785	2.04695	0.015948	1.70388	0.000403021
MSMEG1727	1.00436	0.969018	1.27075	0.0250715	1.19657	0.219514	1.3117	0.0174781	1.42176	0.0998693
MSMEG1728	0.704534	0.0155037	1.01983	0.833205	1.04797	0.70726	1.02152	0.876497	1.12541	0.411593
MSMEG1729	0.559325	0.000157299	1.29639	0.00869772	1.35886	0.0125362	1.19615	0.0110824	1.41477	2.28198e-05
MSMEG1730	1.2398	0.330719	0.849282	0.0930671	0.376105	0.00824149	0.638328	0.0370663	0.381461	0.000382358
MSMEG1731	1.58588	0.107453	1.13004	0.347682	1.50193	0.0245685	1.46779	0.00986328	2.14663	0.0130491
MSMEG1732	1.3428	0.0648482	1.22467	0.000371723	1.20907	0.0759274	1.30728	0.0131965	1.00937	0.929844
MSMEG1733	0.675047	0.0530467	1.08626	0.212939	1.36768	0.113651	1.15293	0.422012	1.22783	0.233043
MSMEG1734	0.924553	0.610414	1.08067	0.440349	1.08539	0.634313	1.1769	0.12406	1.08914	0.570416
MSMEG1735
MSMEG1736	0.873781	0.46466	0.985433	0.832139	0.764845	0.0181004	0.854842	0.197201	0.956105	0.812322
MSMEG1737	0.969884	0.843808	1.93664	5.67003e-05	1.89587	0.00936023	2.04459	0.000280955	1.74846	0.000170532
MSMEG1738	1.96225	0.00866956	0.761753	0.00440789	1.54772	0.0250351	1.50557	0.00693106	1.97787	0.000122458
MSMEG1739	1.1912	0.196339	1.18667	0.0543618	0.696155	8.09043e-05	1.08443	0.553367	0.932109	0.563189
MSMEG1740	0.900671	0.135685	1.46852	0.0210829	0.857642	0.315487	1.51656	0.0549368	1.04001	0.846502
MSMEG1741	0.570801	0.00213534	1.20734	0.00432407	1.26254	0.00293563	1.43263	0.00291282	1.30409	0.000448392
MSMEG1742	1.47048	0.0510971	1.0298	0.725681	1.14804	0.416206	0.964968	0.869638	1.01119	0.95782
MSMEG1743	0.698372	0.049482	1.27192	0.0464394	0.987148	0.883945	1.12513	0.208534	1.14713	0.311573
MSMEG1744	1.03772	0.820918	1.01499	0.868543	1.33746	0.124707	1.77447	0.00784311	1.50672	0.0427281
MSMEG1745
MSMEG1746	0.541299	0.04356	1.03589	0.67314	1.33789	0.0444474	1.08912	0.633331	1.04193	0.72412
MSMEG1747	0.638858	0.00158029	1.0776	0.0331423	1.05791	0.308741	0.939971	0.324839	1.2309	0.000322985
MSMEG1748	0.925495	0.659766	0.83297	7.11333e-06	0.75144	0.0546688	0.592045	0.000568057	0.686869	0.0499839
MSMEG1749	1.01819	0.923111	0.85678	0.160152	1.42348	0.035482	1.44193	1.33832e-05	1.77082	0.00581159
MSMEG1750	0.660849	0.0943188	0.894557	0.348751	0.354285	0.00120399	0.69541	0.225815	0.595442	0.0907352
MSMEG1751	1.9782	0.0006084	0.894121	0.303884	1.80486	0.00058448	1.75052	8.0665e-07	2.16692	6.33157e-09
MSMEG1752	0.664214	0.000253807	0.785183	6.59554e-05	0.439174	0.001359	0.497843	0.00126926	0.400146	0.0107622
MSMEG1753	0.668285	0.0364404	0.861584	0.29241	0.865344	0.312908	0.768536	0.268937	0.724206	0.0614587
MSMEG1754	0.841673	0.345628	1.09321	0.217563	1.33614	8.23004e-05	1.44046	0.0926193	1.49385	0.0157683
MSMEG1755	0.721713	0.0265452	1.10163	0.29963	0.992713	0.937971	0.949842	0.690396	1.05531	0.595076
MSMEG1756	1.14267	0.279002	0.800647	0.0612004	1.43401	0.00262833	1.19366	0.209391	0.709881	0.189631
MSMEG1757	1.4983	0.117182	0.897892	0.505044	0.725321	0.411005	0.60213	0.00887797	0.451366	0.00261867
MSMEG1758	0.685304	0.000782167	0.786211	7.45167e-06	0.228773	0.00138044	0.335512	0.0058136	0.278187	0.000268771
MSMEG1759	1.8157	7.49287e-06	1.06423	0.257718	1.56928	4.67881e-05	1.57037	0.0144641	1.46925	5.91601e-05
MSMEG1760	2.70552	0.000408291	1.13332	0.0192626	2.05658	2.85809e-05	2.10745	1.56486e-05	2.42432	2.83799e-08
MSMEG1761	1.1858	0.394961	1.83476	6.82582e-05	1.79897	0.0015803	2.40131	0.00458156	1.80893	0.00164431
MSMEG1762	0.75504	0.00195227	1.16189	0.219452	0.884773	0.267177	0.997918	0.990238	0.938629	0.628377
MSMEG1763	1.1483	0.40411	1.27149	0.000245576	1.41	0.0528195	1.45048	0.00242678	1.32232	0.102975
MSMEG1764	0.940703	0.256442	0.687465	0.00271073	1.12699	0.550229	0.879146	0.463119	0.823568	0.552622
MSMEG1765	1.08753	0.613737	1.06994	0.243369	1.62297	5.34853e-05	1.57357	4.30641e-05	1.80512	1.18677e-06
MSMEG1766	1.60965	0.141699	1.015	0.848485	1.20724	0.104485	1.22508	0.0226897	1.23284	0.111674
MSMEG1767	1.27705	0.277153	1.12834	0.114833	1.44136	0.186463	1.33513	0.240472	1.18983	0.365653
MSMEG1768	1.67465	0.0218788	1.55035	0.00199248	1.77048	0.0064637	1.53804	0.00582278	1.38905	0.0407638
MSMEG1769	1.01768	0.907705	0.989958	0.914157	0.652857	0.000222897	0.593639	0.0259796	0.595254	0.00763374
MSMEG1771	0.958203	0.866139	0.970104	0.646228	1.28771	0.00516736	1.21359	0.125546	1.2306	0.168405
MSMEG1772	1.01186	0.891796	1.10251	0.121382	1.37806	0.0380863	1.42312	0.0661415	1.15119	0.384404
MSMEG1773	2.87679	6.94713e-05	1.06733	0.561672	2.37703	0.00100019	2.29737	0.0044985	4.38005	0.000720629
MSMEG1774	0.586352	0.000996106	1.14878	0.179689	1.59079	2.66225e-06	1.50522	0.000651035	1.71854	8.9035e-05
MSMEG1775	2.84129	0.025836	2.3933	0.000261874	3.09551	0.000984001	4.15026	4.24801e-06	5.75578	0.000785863
MSMEG1776	3.64089	3.5632e-05	1.5019	0.00920057	0.3136	0.000835013	0.385288	0.00241912	0.323863	4.24643e-06
MSMEG1777	0.617947	0.00880717	0.756707	0.00376761	0.599842	0.0187266	0.586608	0.00501077	0.618918	0.096548
MSMEG1778	0.550404	0.00252066	1.11474	0.0522468	1.13019	0.0716546	1.2029	0.339804	0.975731	0.70131
MSMEG1779	1.16946	0.367344	0.809726	0.000506053	1.14696	0.0715938	0.827616	0.268555	0.960132	0.839014
MSMEG1780
MSMEG1781	1.48612	0.0896498	1.1124	0.575858	0.788682	0.112402	0.83757	0.359558	0.894509	0.70312
MSMEG1782	1.19662	0.473962	0.85608	0.178836	1.85144	0.00010875	1.83263	6.06297e-08	1.99085	0.000281035
MSMEG1783	0.425426	5.72102e-05	0.742208	0.000896752	0.616076	3.64009e-06	0.64133	6.49581e-05	0.604211	0.000297926
MSMEG1784	1.09992	0.625049	1.01272	0.913639	0.828998	0.00260207	0.865826	0.127428	0.878954	0.0758695
MSMEG1785	2.04005	0.0111464	2.02185	1.09041e-05	1.37629	0.247611	2.05343	0.0583326	1.33799	0.268306
MSMEG1786	1.61839	0.0412712	1.95311	1.10071e-05	1.5008	0.0593773	1.14803	0.366237	1.09644	0.760298
MSMEG1787	5.51436	0.00483039	1.73755	0.00366685	1.28087	0.00956076	1.44236	0.000527644	1.29243	0.00233049
MSMEG1788	0.740126	0.20018	1.09599	0.52463	1.19088	0.330415	0.989787	0.931299	1.13758	0.492468
MSMEG1789	1.39858	0.160917	0.973345	0.793076	0.985362	0.946389	1.2354	0.398294	0.844832	0.563305
MSMEG1790	0.760527	0.0588586	0.831707	0.096988	0.832096	0.471149	0.809406	0.269187	0.818812	0.0902477
MSMEG1792	0.95484	0.820717	0.950241	0.496948	0.837405	0.0750115	0.798725	0.21201	0.733635	0.11793
MSMEG1793	0.484055	0.00330087	0.606956	1.14645e-05	0.378916	2.84837e-08	0.293195	0.000188309	0.335951	0.00216312
MSMEG1794	0.932644	0.749335	0.960886	0.492729	1.07295	0.599451	1.05835	0.75072	1.03141	0.771551
MSMEG1795	1.34021	0.0931727	0.851301	0.0392776	1.28867	0.036372	1.33227	0.0643926	1.67283	0.00138552
MSMEG1796
MSMEG1797	1.52961	0.0200538	1.06791	0.619772	1.76009	0.0046035	1.88276	2.94385e-06	1.83253	0.000316731
MSMEG1798	1.85902	9.42362e-06	0.640666	0.000567116	1.36711	0.0684838	1.15736	0.450649	1.30648	0.0696178
MSMEG1799	1.48858	0.029685	1.0614	0.228726	1.63953	0.00614523	1.7569	0.000145411	1.37307	0.264422
MSMEG1800	1.49548	4.03765e-05	0.963607	0.307369	0.414658	0.00264154	0.444063	1.88371e-09	0.405134	0.000350599
MSMEG1801	1.11723	0.457174	0.844153	0.11151	0.525895	0.0106874	0.565547	0.0137761	0.772014	0.225141
MSMEG1802	0.706848	0.0430059	0.994958	0.948777	0.658001	0.00914294	0.579312	0.0129245	0.570523	0.00136725
MSMEG1803	0.62383	0.0238924	1.21483	0.000637829	0.964965	0.296006	0.966653	0.726332	0.957591	0.51081
MSMEG1805	1.04136	0.852977	0.948503	0.276516	1.07662	0.545161	1.03316	0.879055	1.50216	0.11216
MSMEG1807	2.84765	0.0119164	1.67471	0.00511824	1.09102	0.258284	1.02395	0.788572	0.980926	0.891723
MSMEG1808	1.40677	0.0863384	0.973907	0.796264	1.26201	0.00634438	1.2971	0.00551052	1.30493	0.000476423
MSMEG1809	2.47226	2.86789e-05	1.43698	0.00160165	1.40782	0.310429	1.31392	0.369129	1.87678	0.00388955
MSMEG1810	1.53503	0.0001137	1.0234	0.82733	2.02909	0.00116594	2.33073	3.28226e-05	1.98635	0.00646102
MSMEG1811	1.10297	0.657006	1.0235	0.912864	1.14211	0.622406	0.922093	0.348911	0.984226	0.947945
MSMEG1812	0.541162	0.0243731	1.07758	0.660479	0.410188	0.0120441	0.707672	0.0424825	0.652349	0.0307118
MSMEG1813	0.792859	0.187261	0.713657	0.00213685	0.702736	0.0597881	0.731012	0.00247117	1.03566	0.797699
MSMEG1814	0.798493	0.140865	0.968441	0.508934	1.93615	0.00194174	1.87563	0.00150823	1.95434	0.000425894
MSMEG1815	0.82303	0.267157	0.901702	0.255038	0.836689	0.0840245	0.774398	0.0804329	0.85551	0.280259
MSMEG1816	0.966246	0.865252	0.826981	0.0819863	0.78502	0.0657705	0.643173	0.0016525	0.817752	0.249697
MSMEG1817	0.640466	0.00376739	1.53659	6.04822e-06	1.18842	0.00339419	1.41309	0.000138585	1.22747	0.0672771
MSMEG1818	1.21159	0.0102997	0.674599	0.000105556	2.06256	0.00482942	1.34484	0.000783264	1.90866	9.85269e-08
MSMEG1819	0.456415	4.62819e-06	0.979298	0.528964	0.69797	0.0340079	0.860878	0.325812	0.762104	0.0145114
MSMEG1820	1.7449	0.00370386	1.5962	0.000693294	1.56641	1.52112e-06	0.996976	0.988092	1.45682	0.17632
MSMEG1821	1.61441	0.0610917	1.17727	0.299357	1.32254	0.0747246	1.11838	0.564293	0.999472	0.997087
MSMEG1822	0.604999	3.65896e-05	0.785985	8.22272e-05	0.685728	9.14063e-06	0.80504	0.266496	0.854689	0.544025
MSMEG1823	1.22042	0.066034	1.14827	0.22517	1.37102	0.0227656	1.53602	0.000277171	1.33607	0.014915
MSMEG1824	1.25056	0.0351044	1.02312	0.345613	1.07584	0.761685	0.968081	0.711617	1.07265	0.533717
MSMEG1825	0.92218	0.191167	1.10734	0.161217	1.42522	0.00200925	1.46619	0.00611763	1.63245	0.0231658
MSMEG1826	0.876485	0.553156	1.18198	0.0323128	0.8444	0.502887	1.05334	0.601993	0.989846	0.929956
MSMEG1827	0.621809	0.00223027	0.961032	0.761072	1.10545	0.0275388	1.07639	0.499627	1.07698	0.38415
MSMEG1828	1.04746	0.619748	1.02766	0.864131	0.665636	2.89674e-05	0.715828	0.143678	0.670694	0.0628543
MSMEG1829	0.886152	0.629983	0.826095	0.0390086	0.583474	2.63813e-07	0.451366	1.96814e-07	0.617833	0.00073551
MSMEG1830	1.46421	0.00378103	1.00843	0.951222	1.14935	0.319808	1.19687	0.148935	1.25732	0.0599561
MSMEG1831	1.04065	0.508972	1.05805	0.582609	1.21455	0.145085	1.47782	0.0024493	1.38877	0.00374301
MSMEG1832	0.667628	0.000190552	1.02327	0.702387	0.564908	1.03247e-05	0.552018	0.000480663	0.558172	0.00610762
MSMEG1833	2.83948	0.00135502	1.73626	9.34505e-05	2.33178	0.00551643	2.92283	0.000164104	2.48	0.000789994
MSMEG1834	0.582499	0.0309437	0.477526	1.09823e-07	0.766885	0.0804651	0.485502	0.00188985	0.406335	0.00329299
MSMEG1835	0.657907	0.00188755	1.00324	0.939336	1.2573	0.275525	1.15517	0.183389	1.14803	0.428273
MSMEG1836	1.17992	0.392252	1.04887	0.595088	1.39805	0.000484936	1.4994	0.00031943	1.86438	0.000192671
MSMEG1837	1.20402	0.00634187	0.813645	0.00933503	1.29233	0.348022	1.56975	0.0132853	1.20463	0.363739
MSMEG1838	0.822172	0.418197	0.789439	0.0715444	0.841247	0.198372	0.722644	0.0957862	0.698067	0.0408396
MSMEG1839	0.666257	0.0239024	0.92537	0.201226	0.785872	0.0764047	0.837475	0.32943	0.713179	0.100376
MSMEG1840	1.12575	0.609123	0.740425	0.0156512	0.4515	0.0116878	0.586583	0.0710839	0.525228	0.0596126
MSMEG1841	1.38177	0.0191186	1.0467	0.659796	1.33093	0.0164145	1.2262	0.137046	1.16642	0.262221
MSMEG1842	1.6762	0.000437327	1.01418	0.930476	1.37025	0.0112904	1.5812	0.0064179	1.67126	0.000231895
MSMEG1843	0.961599	0.829278	0.924025	0.528435	0.734778	0.128637	0.934531	0.556067	0.602644	0.0208871
MSMEG1844	0.496665	0.00721023	0.734425	0.0101537	0.564693	0.00824024	0.549667	0.0159527	0.556761	0.00194992
MSMEG1845	1.687	0.00610144	0.840237	0.00169427	1.4053	0.0101259	1.42953	0.0296263	1.47101	0.0112627
MSMEG1846	0.893	0.571158	0.798192	0.132882	0.743154	0.0202914	0.557231	0.00443799	0.680157	0.0132063
MSMEG1847	0.67382	0.00203556	0.913462	0.106309	0.767109	0.125355	0.67372	0.013107	0.674571	0.00910293
MSMEG1848	1.03497	0.820205	1.07036	0.477884	0.92651	0.635645	0.952073	0.71386	1.08228	0.663717
MSMEG1849	1.01306	0.915417	0.787639	0.0076251	1.13804	0.30734	1.10015	0.444712	1.22791	0.0679651
MSMEG1850	1.56844	0.0107653	1.27851	0.297146	0.916904	0.353535	0.92406	0.580958	0.867869	0.323151
MSMEG1851	0.742502	0.309139	0.483098	0.000560521	0.229916	0.000155399	0.211334	9.53216e-05	0.263775	6.41064e-05
MSMEG1853	1.22492	0.484432	1.20669	0.0177175	2.00586	0.000105662	2.80711	0.00023647	1.99954	8.72683e-06
MSMEG1854	0.579519	0.0371152	1.50508	0.058179	1.61642	0.000609138	1.46835	0.00371587	1.83126	4.0117e-05
MSMEG1855	1.35902	0.297709	1.07869	0.230209	1.16595	0.205013	1.31303	0.00134802	1.20842	0.102374
MSMEG1857	1.93252	0.0222001	1.13446	0.285413	1.9659	9.40422e-07	2.17788	0.000292192	2.08201	1.19976e-05
MSMEG1858	1.17606	0.244116	0.762853	0.0139663	0.786656	0.346418	0.579965	0.0255052	0.529712	0.00697604
MSMEG1859	0.905774	0.367666	1.05831	0.414286	0.912175	0.605261	1.0407	0.820226	0.892922	0.539576
MSMEG1860
MSMEG1861
MSMEG1862	0.982957	0.91265	0.919772	0.636997	1.01822	0.946059	1.16873	0.504947	1.63316	0.0426903
MSMEG1863	2.67578	0.000515885	1.30014	0.00507973	1.83218	9.63738e-05	1.8889	1.4277e-05	2.5383	0.000300617
MSMEG1864	1.16559	0.355167	0.98764	0.729025	1.37672	0.036977	1.56147	3.81634e-05	1.47944	0.0820011
MSMEG1865	1.51679	0.049617	0.884304	0.129242	1.22275	0.0215093	1.17945	0.158904	1.03841	0.831002
MSMEG1866	1.21716	0.0718254	2.01295	0.00197869	0.864013	0.0575439	0.953689	0.330153	1.04446	0.652545
MSMEG1867
MSMEG1868	2.55723	0.0283621	1.1712	0.184311	5.62016	0.00156069	2.30409	0.000919224	2.12737	1.16912e-06
MSMEG1869	2.11276	0.00196847	1.05714	0.733493	1.02335	0.851561	1.14076	0.220815	0.928993	0.529678
MSMEG1870	0.993714	0.950275	1.27774	0.00372828	1.69709	0.000264806	1.64672	2.52956e-08	1.62858	0.000553393
MSMEG1871	2.35352	0.00448223	0.861786	0.0342235	1.6708	8.1756e-05	1.66439	0.000847265	2.59044	0.000152199
MSMEG1872	1.13428	0.298522	0.989929	0.895738	1.10733	0.429276	1.09148	0.558469	1.13687	0.487089
MSMEG1873	1.45569	0.000163531	1.16771	0.174437	2.13341	2.03447e-05	2.48728	0.000330874	2.16465	1.9407e-05
MSMEG1874	0.916489	0.709713	0.837994	0.0291566	2.13926	0.00155753	2.0191	0.00430194	2.90096	1.59657e-05
MSMEG1875	0.777758	0.173203	1.10529	0.00202523	1.16177	0.156391	0.996057	0.987459	1.10227	0.627889
MSMEG1876	0.620831	0.00283046	0.985343	0.869754	0.475965	0.000100009	0.566006	0.011815	0.619602	0.00125741
MSMEG1877	0.762858	5.92967e-05	0.965696	0.54648	0.749407	2.33618e-05	0.719794	0.000323886	0.715971	0.0360431
MSMEG1878	0.885323	0.59885	0.58976	0.000130058	0.705142	0.207397	0.714476	0.110698	0.518933	0.0734659
MSMEG1879	1.36588	0.00537752	0.977109	0.567844	1.55049	0.00470414	1.58696	1.45703e-06	1.56397	0.0191264
MSMEG1880	0.850842	0.5659	0.675542	0.000557158	0.557969	4.13102e-05	0.533427	0.00024259	0.554968	0.000660104
MSMEG1881	0.781029	0.200107	0.824113	0.260286	0.499023	0.0186841	0.88519	0.63729	0.900194	0.630493
MSMEG1882	0.963505	0.7969	0.652763	0.00525525	0.684981	0.163432	0.664197	0.0703572	0.531873	0.0349003
MSMEG1883	0.772513	0.145533	0.92181	0.375479	0.761991	0.0139858	0.742885	0.00157321	0.801676	0.0295654
MSMEG1884	2.21091	0.00726565	0.943387	0.476629	0.821189	0.525146	0.670841	0.0844408	0.70821	0.0403679
MSMEG1885	0.614141	0.00395972	1.04701	0.513734	1.43013	0.000147485	1.30948	0.0394327	1.34431	0.0011389
MSMEG1886	0.602126	0.00923643	1.3324	0.0419534	6.17604	0.000958305	2.41053	5.72735e-05	3.9185	0.00097257
MSMEG1887	0.880707	0.492798	1.67074	7.48692e-05	1.76552	1.28805e-06	1.85144	0.0202777	1.19058	0.466146
MSMEG1888	2.48369	0.000306947	1.33836	0.0245302	1.94693	3.76592e-05	3.2095	2.90928e-05	1.78679	0.000261045
MSMEG1889	1.63518	0.00166064	0.878788	0.24214	0.753269	0.00455327	0.76201	0.00566967	0.781792	0.00167367
MSMEG1890	1.32861	0.0414143	0.993475	0.942168	1.30208	6.53006e-05	1.07406	0.713852	0.882602	0.517729
MSMEG1891	1.16357	0.486092	1.07164	0.326373	1.11434	0.350343	1.39201	0.264994	1.08068	0.518362
MSMEG1892	0.647869	0.0290837	0.978107	0.704906	0.87388	0.505551	0.876051	0.415638	0.800106	0.330894
MSMEG1893	0.795912	0.199439	1.06652	0.281167	0.819724	0.118444	0.717829	0.179336	0.560535	0.0301464
MSMEG1894	0.790416	0.00141542	1.1772	0.131511	0.842881	0.100921	0.708803	0.0573289	0.84414	0.278906
MSMEG1895	0.727703	0.131661	1.20333	0.319365	1.27537	0.0367211	1.32834	0.0386463	1.38726	0.0272907
MSMEG1896	0.569608	0.000595688	1.40631	0.116782	1.18047	0.433633	1.21942	0.234036	0.993812	0.983188
MSMEG1897	1.42167	0.213619	1.4244	0.000110629	2.23423	5.19734e-06	2.84589	9.24672e-07	2.51727	1.16002e-05
MSMEG1898	0.870358	0.0266077	0.996568	0.88659	0.462835	0.0105084	1.07844	0.776494	0.884921	0.518115
MSMEG1899
MSMEG1900
MSMEG1901	0.792956	0.168518	1.01164	0.87958	0.910294	0.254989	0.835275	0.328291	0.789496	0.0188553
MSMEG1902	0.834207	0.0195757	1.255	8.27356e-06	1.02115	0.784121	1.10241	0.120899	1.00083	0.991641
MSMEG1904	2.24783	0.00981635	1.2205	0.023165	1.80412	2.1558e-05	2.23832	0.0166813	1.80992	0.0200525
MSMEG1905	1.36593	0.207028	0.985605	0.878831	1.65884	0.00897132	1.50651	0.00914963	1.75082	0.00110389
MSMEG1907	1.84888	0.0050225	0.982202	0.820886	1.51979	0.0683156	1.51143	2.22563e-07	1.57497	6.22031e-10
MSMEG1908	1.60463	0.11423	1.4583	0.0582207	1.03535	0.758904	1.0861	0.161917	1.42374	0.202628
MSMEG1909	0.736925	0.00142562	1.02235	0.886861	0.713857	0.00258795	0.714351	0.181357	0.612266	0.0360703
MSMEG1910	1.28911	0.195244	1.21536	0.0190388	1.44254	0.0161711	1.2213	0.0869592	1.28058	0.0511942
MSMEG1912	0.54512	0.0085734	0.962897	0.60184	1.22281	0.0792897	1.16988	0.18443	1.09029	0.612595
MSMEG1913	1.00943	0.9462	0.627822	0.00544204	0.552348	0.0785256	0.444907	0.0025879	0.507867	0.0289284
MSMEG1914	0.799804	0.187845	0.980295	0.62274	1.46253	0.00106047	1.38355	0.00120985	1.82153	2.94086e-05
MSMEG1915	1.26472	0.113983	0.919174	0.0620419	1.34558	0.0137861	1.67962	0.0880953	1.67863	0.00440541
MSMEG1916	1.03773	0.867583	0.983522	0.901026	1.38089	0.0121834	1.1508	0.437087	1.15497	0.287592
MSMEG1917	0.481218	1.96593e-06	0.975224	0.669545	0.671462	3.0544e-06	0.664875	9.17636e-05	0.755784	0.0143905
MSMEG1918	1.24629	0.19205	1.17548	0.27159	1.12781	0.117485	1.14271	0.42509	1.18436	0.0837839
MSMEG1919	0.40705	7.77097e-05	0.793888	0.018761	0.65977	0.0439893	0.605041	0.00538259	0.595149	0.0238666
MSMEG1920	0.578147	0.0266491	0.446044	1.00657e-05	0.371425	0.0213177	0.526117	9.11008e-05	0.287278	5.52664e-05
MSMEG1921	0.972034	0.881569	0.874714	0.234549	1.00612	0.966149	1.20303	0.237864	1.05994	0.715886
MSMEG1922	0.970276	0.881722	0.812144	0.0885181	0.35961	0.000378265	0.487466	0.0080557	0.557725	0.0455621
MSMEG1923	2.02681	0.0548279	1.46782	0.0707095	0.608411	0.104417	0.839447	0.489479	0.614538	0.0971243
MSMEG1924	1.42325	0.344507	1.14493	0.493386	1.0637	0.753995	1.01285	0.923454	1.10051	0.644354
MSMEG1926	1.88483	0.013262	1.36559	0.00150823	1.84693	1.37987e-06	1.98383	2.52107e-05	1.85254	0.000445663
MSMEG1927	1.31315	0.151696	0.773603	0.0604726	0.818968	0.482087	0.773683	0.340169	0.746207	0.370981
MSMEG1928	2.5403	3.33013e-05	1.22512	1.81966e-05	1.02172	0.664242	0.970835	0.741767	0.836898	0.0966607
MSMEG1929	0.861319	0.443068	1.25848	0.060818	0.6461	0.00014593	0.660721	0.00434149	0.683528	0.00382177
MSMEG1930	0.561612	0.0017841	0.456855	1.18283e-07	0.285185	0.00195043	0.404533	0.00200254	0.165239	2.05817e-05
MSMEG1931	1.00072	0.98951	0.836037	0.102853	0.743972	0.161801	0.624508	0.0174638	0.792723	0.175865
MSMEG1932	0.993755	0.961138	1.17727	0.0327059	0.8273	0.235016	0.893425	0.546932	0.779704	0.320468
MSMEG1933	6.01102	1.62339e-07	2.50817	1.50809e-05	4.03894	3.30156e-06	4.29597	0.000173765	4.93923	4.4338e-06
MSMEG1934	2.23474	0.000731784	1.10065	0.0705695	1.79834	0.00227339	1.73712	1.32252e-06	2.13897	9.62906e-06
MSMEG1935	1.01166	0.966316	0.565116	0.00308497	0.233504	0.000700554	0.292948	0.00641325	0.417499	0.00426978
MSMEG1936	0.700983	0.177639	0.703013	1.67576e-05	0.429094	0.000200959	0.428206	0.000343821	0.329775	0.00109358
MSMEG1937	1.2934	0.230011	0.900248	0.600998	1.50356	0.132886	1.44224	0.00629698	1.48678	0.0489371
MSMEG1938	0.941068	0.281367	1.12469	0.011083	1.40276	0.196901	1.19374	0.339491	1.12353	0.640483
MSMEG1939	1.84826	5.99047e-05	0.995981	0.914346	0.613285	0.165806	0.431248	0.000201056	0.502119	0.0029808
MSMEG1940	0.46389	0.000725413	0.83501	0.0550082	1.15077	0.542428	0.942318	0.733502	0.971795	0.831187
MSMEG1941	0.984655	0.874552	0.77936	0.0206509	0.493095	2.6603e-08	0.676459	0.0915226	0.465187	0.00234067
MSMEG1942	2.0785	0.00511117	1.17835	0.0820676	0.907261	0.0802753	0.952025	0.786011	0.890454	0.506809
MSMEG1943	0.658757	4.82735e-06	0.982693	0.801622	0.905481	0.484399	0.700518	0.22527	0.834482	0.462965
MSMEG1944	1.32031	0.00273283	0.959208	0.386133	1.0519	0.830507	1.01075	0.900261	1.02936	0.805094
MSMEG1945
MSMEG1946	2.31044	0.000199991	1.97556	1.08448e-06	2.19297	2.8143e-06	2.31436	6.04899e-07	3.37025	1.2481e-09
MSMEG1947	0.797176	0.260752	0.789565	0.0267243	0.468993	0.0205536	0.577149	0.00827682	0.466806	0.00549168
MSMEG1948	0.494737	0.00196672	1.25183	0.00768119	1.68831	8.05671e-07	1.33716	0.0170428	1.48574	0.0133714
MSMEG1949	1.5195	0.0872325	1.08008	0.492235	0.968261	0.905591	0.890241	0.680854	0.81947	0.515419
MSMEG1950	1.14336	0.560221	1.14677	0.00476886	1.09354	0.298824	1.15919	0.566012	1.09687	0.749606
MSMEG1951	1.51187	0.0178498	2.47702	1.14111e-05	2.51741	0.000148121	3.03679	8.1568e-07	3.35315	3.26037e-08
MSMEG1952	0.646845	0.0175524	0.871138	0.206018	3.4081	1.19136e-05	2.75372	8.60233e-07	4.77846	6.87452e-07
MSMEG1953	1.21539	0.0425443	0.992313	0.890527	1.32485	0.0336534	1.40691	0.0133108	1.70216	0.00315153
MSMEG1954	0.812166	0.0293975	1.54004	9.73268e-06	1.05638	0.103858	1.03162	0.904074	0.923384	0.77477
MSMEG1955	3.25419	0.00162344	1.40729	0.0360359	0.686425	0.0359461	0.81873	0.0904603	0.716467	7.66367e-06
MSMEG1956	0.965385	0.585272	1.00128	0.986079	0.877556	0.238512	0.691749	0.0914444	0.499313	0.00114683
MSMEG1957	0.745321	0.051478	1.76729	2.32373e-06	2.41288	5.32565e-07	2.63076	1.69875e-10	2.65972	1.68342e-10
MSMEG1958	0.903603	0.373326	0.79408	0.21085	1.26047	0.0211192	1.27975	0.0988887	1.2513	0.0823321
MSMEG1959	0.990712	0.948347	1.23666	0.0911872	1.12406	0.0560392	1.10639	0.106523	1.10528	0.104978
MSMEG1960	0.927767	0.650349	1.00008	0.999214	0.952956	0.557522	1.01286	0.889397	0.872232	0.184865
MSMEG1961	0.910673	0.294491	0.696911	7.68309e-09	1.15575	0.475301	1.7401	0.110802	1.317	0.27846
MSMEG1962	1.44728	0.114836	0.737957	2.41708e-07	0.469946	2.32081e-10	0.45627	3.79652e-05	0.637664	0.207294
MSMEG1963	1.31007	0.0458753	0.74233	0.00508689	0.323976	5.71332e-05	0.40931	7.62858e-05	0.274271	0.000307174
MSMEG1964	1.19447	0.387623	0.612187	0.00113293	0.426234	0.000150649	0.651759	0.163343	1.06908	0.833006
MSMEG1965	1.20217	0.122894	0.803838	0.0020672	1.80075	1.7567e-05	1.85029	0.00108574	2.58438	4.60029e-06
MSMEG1966	1.46152	0.0587015	1.08242	0.40976	0.874797	0.433199	0.839689	0.391945	0.745506	0.295101
MSMEG1968	1.31397	0.000427801	0.681148	0.00568965	0.691358	0.156016	0.86079	0.365254	0.533872	0.0408338
MSMEG1969	0.486763	0.00320669	1.28125	0.000488376	2.17559	2.92169e-06	1.62877	2.67889e-06	1.6468	0.000221038
MSMEG1970	1.61755	0.132912	0.959894	0.723473	1.8109	0.00278494	2.27864	0.000655327	6.98175	0.000642726
MSMEG1971	0.686052	0.0088175	1.26406	0.0109325	2.41042	1.03421e-07	2.4858	2.05654e-07	2.75511	5.76346e-10
MSMEG1972	0.786915	0.314475	1.14966	0.343421	1.29571	0.0642212	1.31501	0.0769908	2.08743	0.000679673
MSMEG1973	0.698446	0.155902	0.908848	0.628719	0.732479	0.0118623	0.563953	0.0216687	0.803893	0.216597
MSMEG1974	0.622075	0.0269919	0.972412	0.593091	1.0903	0.0551826	1.07688	0.753823	1.25357	0.0305116
MSMEG1975	1.05821	0.761839	0.693873	0.00774498	0.905282	0.619537	0.820256	0.434335	0.781135	0.265852
MSMEG1976	0.608907	0.0348811	0.96418	0.409391	0.759571	0.0014267	0.66506	0.0316027	0.725514	0.0690957
MSMEG1977	0.940333	0.7049	0.942159	0.545092	1.2264	6.20113e-05	1.18145	0.0472921	1.19812	0.0401994
MSMEG1978	1.13435	0.287849	0.96811	0.558033	2.17027	4.2552e-05	2.17629	0.0005549	2.92542	3.39804e-06
MSMEG1979	0.853754	0.379999	0.905553	0.374334	0.904883	0.490835	1.01335	0.914227	1.01078	0.965664
MSMEG1980	0.547499	0.00057706	0.949729	0.230455	2.04848	0.000850783	1.3155	0.0427755	1.34611	0.0187674
MSMEG1981	0.604015	0.000434775	0.911432	0.10394	0.994435	0.871792	1.14199	0.154095	1.2263	0.0934846
MSMEG1982	1.01253	0.868887	1.12318	0.0370344	0.977404	0.863723	1.15416	0.282794	1.14324	0.203576
MSMEG1983	0.897815	0.595266	0.991177	0.867146	1.10754	0.168208	1.02409	0.806656	1.01486	0.904367
MSMEG1984	0.893164	0.226566	1.11918	0.178457	1.55413	0.0229571	1.9572	1.26051e-07	1.89869	0.0114839
MSMEG1985	3.26373	0.000698424	1.21756	0.0681998	2.0895	0.00384725	1.2303	0.19549	1.76038	0.0608029
MSMEG1986	0.65414	0.00731464	1.0321	0.350768	1.00797	0.835516	0.937713	0.514673	0.926601	0.42567
MSMEG1987	0.73066	0.0137608	0.578588	5.17305e-06	1.02294	0.88585	0.909163	0.520372	0.960127	0.760965
MSMEG1988	1.62574	0.0579397	0.921628	0.581113	1.52363	0.00264295	1.6591	0.0678804	1.70801	0.00292054
MSMEG1989	1.0409	0.609301	1.02722	0.557198	1.20297	0.000977515	1.21285	0.00786969	1.05489	0.683453
MSMEG1990	1.21517	0.250802	0.766957	0.188217	0.50082	0.065594	0.981722	0.948846	0.499185	0.00341895
MSMEG1991	0.701602	0.170864	0.681112	0.00278887	0.313785	7.45022e-05	0.276008	7.11136e-05	0.38399	0.0143193
MSMEG1992	1.84302	0.0510846	1.09048	0.666301	1.28856	0.00054474	1.35604	0.290531	1.10494	0.595176
MSMEG1993	0.664421	0.0251705	0.842706	0.0633934	1.1833	0.210255	1.07783	0.720847	1.58085	0.0346048
MSMEG1994	1.78646	0.00884001	1.28941	0.00019318	1.60533	0.000474029	1.59051	0.0223698	1.44338	0.0132285
MSMEG1995	1.06001	0.732169	0.77176	0.323015	0.449596	0.0440141	0.482412	0.0104153	0.402685	0.026426
MSMEG1996	0.620197	0.081735	1.22279	0.111314	1.50635	0.00145629	1.13011	0.596349	1.53247	0.0377049
MSMEG1997	1.59563	0.0413093	1.23332	0.0236308	1.7507	0.000541982	1.63182	0.000511878	1.54732	0.00127611
MSMEG1998	1.58771	2.74643e-05	0.873008	0.0212675	1.25893	0.278777	1.17679	0.296807	1.18729	0.459597
MSMEG1999	1.9696	0.130526	0.691758	0.0366313	0.250077	1.10399e-05	0.508656	0.00941173	0.408335	0.000968712
MSMEG2000	1.82023	5.4866e-05	2.00328	5.70528e-07	1.9539	3.73216e-06	2.24819	3.6259e-07	1.98189	5.8609e-07
MSMEG2001	1.77926	0.000916148	0.944616	0.352071	1.70226	0.000898045	1.70367	9.30517e-07	2.93888	0.000334184
MSMEG2002
MSMEG2003
MSMEG2004	0.984337	0.894451	0.701263	0.00548312	0.721267	0.264598	0.794742	0.395555	0.492784	0.0372507
MSMEG2005	0.672817	0.0371512	0.780661	0.0255884	0.361495	0.000705623	0.217403	0.000152004	0.344658	0.00177456
MSMEG2006	2.09837	0.00131381	1.14952	0.0149399	1.60659	0.000584336	1.76302	0.000400848	1.82742	8.9266e-05
MSMEG2007	0.956308	0.801748	1.08565	0.119634	1.2559	0.00265011	1.5861	0.0328097	1.85614	0.00401949
MSMEG2008	1.79221	0.0246537	1.48901	0.309236	1.69175	1.72429e-07	1.53178	0.0387115	1.45004	0.0320265
MSMEG2009	0.941262	0.775344	0.775942	0.00174825	0.781593	0.261637	0.656129	0.059213	0.528586	0.0288948
MSMEG2010	2.12093	0.00142374	0.907978	0.49984	1.4718	0.0767737	1.75411	0.00506828	1.98411	0.000517195
MSMEG2011	1.10331	0.606003	1.26981	0.163828	0.965054	0.808556	0.86894	0.530519	1.03713	0.889497
MSMEG2012	0.726692	0.0730981	0.800365	0.0724707	1.05715	0.644947	0.980563	0.887576	0.938053	0.602924
MSMEG2013	0.868143	0.437506	0.978434	0.750802	1.25511	0.186774	1.36208	0.00980201	1.49368	0.000237599
MSMEG2014	0.778898	0.014176	0.859462	0.19652	1.04754	0.646403	0.909437	0.386493	1.08057	0.256092
MSMEG2015	0.508971	0.0658297	0.880977	0.0398083	0.556032	0.0419172	0.637372	0.0907371	0.467577	0.0150326
MSMEG2016	1.22776	0.175909	1.0784	0.410667	1.17755	0.175995	1.15485	0.352309	1.28213	0.00242205
MSMEG2017	1.18357	0.440978	0.805939	0.115263	0.519563	0.00929748	0.4131	0.0111429	0.500833	0.0138634
MSMEG2018	1.12273	0.494564	1.16752	0.212095	0.843281	0.281905	0.883996	0.374282	1.11467	0.581396
MSMEG2019	0.537136	0.00445172	0.842072	0.00394904	0.700963	0.000259724	0.707225	0.0613293	0.666303	0.0112907
MSMEG2020	0.734189	0.0892638	0.774246	0.00747912	1.17471	0.00181095	1.02484	0.714075	0.983494	0.888031
MSMEG2021	1.84121	0.0332852	0.95071	0.716053	1.52056	0.155179	1.33477	0.242089	1.15206	0.517892
MSMEG2022	1.16481	0.215409	1.07409	0.0604823	0.878034	0.443576	0.7447	0.16938	0.788403	0.0812369
MSMEG2023	1.79219	0.110916	0.771139	0.0484244	0.674174	0.197845	0.93688	0.824557	0.735859	0.34131
MSMEG2024	1.14922	0.497393	1.12975	0.162808	0.847628	0.552423	1.07094	0.659864	1.00158	0.995487
MSMEG2025	0.725426	0.0540575	1.01586	0.876321	1.18289	0.118929	1.61111	0.0957726	1.32792	0.0450596
MSMEG2027	2.07639	0.000427042	1.33922	2.95789e-08	0.984803	0.94131	1.14729	0.472116	0.995965	0.98437
MSMEG2028	1.10053	0.555136	1.44691	6.53437e-05	1.94556	1.6681e-05	1.92371	0.00109396	1.84317	4.08686e-05
MSMEG2029	0.39751	0.000751161	0.707985	0.00681516	0.550649	0.00684121	0.559054	0.0364301	0.628853	0.040835
MSMEG2030	0.770591	0.108795	0.814492	0.0429768	0.647896	0.0134435	0.6247	0.0541763	0.569658	0.0274857
MSMEG2031	1.19233	0.318419	1.0365	0.685417	1.29349	0.0264112	1.33739	0.106292	1.22885	0.0882181
MSMEG2032	1.18094	0.228473	1.21251	0.0277888	1.02454	0.852113	1.03228	0.791962	0.989582	0.904953
MSMEG2033	1.3614	0.121013	1.02783	0.534684	1.27812	0.0195685	1.26138	0.0293255	1.21129	0.00319256
MSMEG2034	1.45766	0.0226286	1.09074	0.382908	1.21485	0.0283458	1.04582	0.538187	1.09711	0.43086
MSMEG2035	1.03679	0.906315	1.02885	0.411778	0.996746	0.912922	0.992053	0.940898	0.937253	0.762789
MSMEG2036	1.08767	0.689916	0.992529	0.933722	1.31148	0.000199509	1.26644	0.306222	1.04249	0.816672
MSMEG2037	1.84621	7.1166e-05	1.08433	0.433934	1.22762	0.242949	1.08503	0.754433	0.927637	0.73813
MSMEG2038	0.479161	0.00151732	1.01555	0.8058	2.72942	9.98346e-05	1.48446	0.00103318	3.24007	0.00212757
MSMEG2039	1.08815	0.133197	0.882338	0.274986	1.23918	0.0929823	1.10774	0.536813	1.08385	0.746186
MSMEG2040	1.09731	0.428677	0.982592	0.851644	1.12589	0.43514	1.38769	0.0267264	1.04543	0.847593
MSMEG2041	2.35469	1.29281e-05	0.834492	0.0337261	1.79542	5.50129e-05	1.56284	0.00107147	1.64488	0.0161026
MSMEG2042	0.58254	0.00587179	1.00998	0.889958	2.41789	3.06234e-05	1.78554	0.00154931	3.20888	0.00308917
MSMEG2043	1.30268	0.000499949	0.904332	0.260169	1.65592	1.49582e-05	1.499	0.00332959	1.48446	0.0209261
MSMEG2044	0.343105	0.000127017	0.860159	0.0534601	1.06246	0.502958	1.01582	0.812456	0.973395	0.883412
MSMEG2045	0.421688	0.000796342	0.985895	0.980145	1.51261	no replicates	0.885546	0.171718	0.979019	0.911487
MSMEG2046	0.861417	0.420359	0.861766	0.082724	0.653077	0.0818994	0.566033	0.00726477	0.810729	0.441006
MSMEG2047	0.430271	0.0041264	1.11323	0.319439	1.35726	0.000123126	1.14139	0.307615	1.22858	0.0440997
MSMEG2048	2.15163	0.0228502	1.41245	0.126071	0.916145	0.711846	0.834273	0.333087	0.864906	0.557101
MSMEG2049	0.557198	0.00178237	0.800587	0.168349	0.817759	0.255272	0.769139	0.245631	0.737062	0.189905
MSMEG2050	0.967486	0.708359	0.97722	0.792378	1.2086	0.000104656	1.06959	0.68704	1.1889	0.00895384
MSMEG2051	1.3421	0.000904091	0.957978	0.555042	1.27417	0.166247	1.20481	0.433367	1.13639	0.219859
MSMEG2052	0.992225	0.975073	1.0851	0.34135	1.78106	0.00972253	1.6281	0.00159806	1.71229	0.00437157
MSMEG2053	0.432337	0.00120579	0.669571	1.24598e-05	0.573061	0.000146814	0.428	0.000423497	0.546187	0.00708356
MSMEG2054	0.796916	0.166928	1.02843	0.652283	0.912663	0.76665	0.867347	0.322157	0.578806	0.018027
MSMEG2055	2.45593	0.00534961	1.20586	0.0189842	1.81071	0.012516	1.98794	3.77383e-06	2.03291	4.74714e-05
[truncated: 4,755 more rows]
