# Supplementary material for: Catalytic and Non-Catalytic Roles for the Mono-ADP-Ribosyltransferase Arr in the Mycobacterial DNA Damage Response
Source: PLoS One. 2011 Jul 18;6(7):e21807. doi: 10.1371/journal.pone.0021807 (PMC3138739; doi:10.1371/journal.pone.0021807)
Supplement: Table S2 — I-SceI microarray- Genes organized by functional category that are upregulated 1.5× only in the site(+) strain, and not in site(−), during log growth following ATc addition. The increase in transcript levels is expressed as a ratio of levels at T = 45/T = 0. p-value≤0.5. (XLSX) [file pone.0021807.s002.xlsx]

## Sheet: Table S2
Table S2. I-SceI microarray- Genes organized by functional category that are upregulated 1.5x only in the site+ strain during log growth following ATc addition
Gene Name	Common Name	TIGR functional category
MSMEG1761	acetylornithine aminotransferase, putative	Amino acid biosynthesis
MSMEG4280	branched-chain amino acid aminotransferase	Amino acid biosynthesis
MSMEG2662	dihydrodipicolinate reductase	Amino acid biosynthesis
MSMEG6038	2-C-methyl-D-erythritol 4-phosphate cytidylyltransferase	Biosynthesis of cofactors
MSMEG5571	Glutamate-cysteine ligase family 2(GCS2) family	Biosynthesis of cofactors
MSMEG6768	D-alanyl-D-alanine carboxypeptidease, putative	cell envelope
MSMEG4876	alkyl hydroperoxide reductase C	Cellular processes, Detoxification
MSMEG1248	RNA helicase, putative	DNA repair/replication
MSMEG5010	HNH endonuclease domain protein	DNA repair/replication
MSMEG1654	exodeoxyribonuclease III	DNA repair/replication
MSMEG1376	endonuclease IV, putative	DNA repair/replication
MSMEG2743	LexA repressor	DNA repair/replication
MSMEG0004	Protein of unknown function (DUF721) superfamily	DNA repair/replication
MSMEG2776	hydrolase, alpha/beta fold family	enzyme-unknown specificity
MSMEG5200	glyoxalase family protein superfamily	enzyme-unknown specificity
MSMEG2248	isochorismatase family protein, putative	enzyme-unknown specificity
MSMEG2362	ACT domain protein	enzyme-unknown specificity
MSMEG3355	nitrilase	enzyme-unknown specificity
MSMEG2468	acyl-CoA thioesterase II	Fatty acid and phospholipid metabolism
MSMEG3159	enoyl-(acyl-carrier-protein) reductase (NADH)	Fatty acid and phospholipid metabolism
MSMEG2226	echA11	Fatty acid and phospholipid metabolism
MSMEG3937	heat shock protein, Hsp20 family	heat shock/protein fate
MSMEG6122	probable cold shock protein [imported]-related protein	heat shock/protein fate
MSMEG0380	O-methyltransferase I	heat shock/protein fate
MSMEG0024	COG0652:Peptidyl-prolyl cis-trans isomerase (rotamase) - cyclophilin family	heat shock/protein fate
MSMEG1954	CsbD-like family	hypothetical protein
MSMEG4490	CBS domain protein	hypothetical protein
MSMEG0815	conserved hypothetical protein	hypothetical protein
MSMEG5903	conserved hypothetical protein	hypothetical protein
MSMEG6236	conserved hypothetical protein	hypothetical protein
MSMEG1957	unnamed protein product	hypothetical protein
MSMEG6169	hypothetical protein	hypothetical protein
MSMEG3425	conserved hypothetical protein	hypothetical protein
MSMEG6645	hypothetical protein	hypothetical protein
MSMEG5065	conserved hypothetical protein	hypothetical protein
MSMEG0064	conserved hypothetical protein	hypothetical protein
MSMEG1240	hypothetical protein	hypothetical protein
MSMEG2995	conserved hypothetical protein	hypothetical protein
MSMEG5926	conserved hypothetical protein	hypothetical protein
MSMEG2752	conserved hypothetical protein	hypothetical protein
MSMEG1237	hypothetical protein	hypothetical protein
MSMEG1318	hypothetical protein	hypothetical protein
MSMEG0891	hypothetical protein	hypothetical protein
MSMEG4489	conserved hypothetical protein	hypothetical protein
MSMEG5758	conserved hypothetical protein	hypothetical protein
MSMEG1681	hypothetical protein	hypothetical protein
MSMEG6127	hypothetical protein	hypothetical protein
MSMEG1951	conserved hypothetical protein	hypothetical protein
MSMEG3421	hypothetical protein	hypothetical protein
MSMEG2413	conserved hypothetical protein	hypothetical protein
MSMEG0549	conserved hypothetical protein	hypothetical protein
MSMEG3264	conserved hypothetical protein	hypothetical protein
MSMEG2758	hypothetical protein	hypothetical protein
MSMEG4402	hypothetical protein	hypothetical protein
MSMEG3325	conserved hypothetical protein	hypothetical protein
MSMEG0242	conserved hypothetical protein	hypothetical protein
MSMEG2318	YCII-related domain superfamily	hypothetical protein
MSMEG3672	sterol desaturase family protein	hypothetical protein
MSMEG3028	Uncharacterised BCR (COG3801) superfamily	hypothetical protein
MSMEG1817	GtrA-like protein family	integral membrane proteins
MSMEG1049	phosphate transport protein	membrane/transport		t
MSMEG2973	protein-export membrane protein SecD	membrane/transport		t
MSMEG1854	Na+/H+ antiporter [imported]	membrane/transport, channels, permeases		t
MSMEG4253	probable membrane transport ATPase ML0890 [imported]	membrane/transport, channels, permeases		t
MSMEG0838	COG1863:Multisubunit Na+/H+ antiporter	membrane/transport, channels, permeases		t
MSMEG3289	transporter, EamA family	membrane/transport, channels, permeases		t
MSMEG0803	uracil-xanthine permease	membrane/transport, channels, permeases		t
MSMEG2729	glnH, putative	membrane/transport, channels, permeases		m
MSMEG6113	4-carboxymuconolactone decarboxylase	metabolism
MSMEG4806	3-hydroxyisobutyrate dehydrogenase	metabolism
MSMEG1082	urease, alpha subunit	metabolism
MSMEG2524	6-aminohexanoate-cyclic-dimer hydrolase	metabolism
MSMEG4347	metallo-beta-lactamase family protein	metabolism
MSMEG6584	P450 heme-thiolate protein	metabolism
MSMEG1887	2Fe-2S iron-sulfur cluster binding domain protein	metabolism
MSMEG0663	alcohol dehydrogenase, zinc-containing	metabolism
MSMEG0619	Amidohydrolase family superfamily	metabolism
MSMEG2390	polyphosphate kinase	metabolism
MSMEG3638	6-phosphogluconate dehydrogenase, decarboxylating	metabolism
MSMEG2350	electron transfer flavoprotein, beta subunit	metabolism
MSMEG2308	probable electron transfer oxidoreductase, putative	metabolism
MSMEG3448	L-serine ammonia-lyase	metabolism
MSMEG6782	1-phosphofructokinase, putative	metabolism
MSMEG0390	peptide synthetase	non-ribosomal peptide synthetases
MSMEG0392	peptide synthetase	non-ribosomal peptide synthetases
MSMEG1173	peptidase, M20/M25/M40 family	Protein fate
MSMEG5813	adenylosuccinate lyase	Purines, pyrimidines, nucleosides, and nucleotides
MSMEG4506	polyketide synthase, putative	Toxin production and resistance
MSMEG4199	undecaprenol kinase, putative	Toxin production and resistance
MSMEG6090	anti-anti-sigma factor family	transcription
MSMEG5158	transcriptional regulator, GntR family	transcription factor
MSMEG0525	transcriptional regulator, GntR family, putative	transcription factor
MSMEG6046	transcription regulator, AraC family [imported]	transcription factor
MSMEG2230	transcriptional regulator, TetR family, putative	transcription factor
MSMEG4030	transcriptional regulator, TetR family domain protein	transcription factor
MSMEG3893	repressor protein, putative	transcription factor
MSMEG1737	transcriptional regulator, TetR family	transcription factor
MSMEG4148	transcriptional regulator tetR family	transcription factor
MSMEG0597	transcriptional regulator, TetR family domain protein	transcription factor
MSMEG6004	transcriptional regulator, LacI family	transcription factor, lac repressor
MSMEG1339	ribosomal protein L11	translation
MSMEG2544	ribosome recycling factor	translation
MSMEG3784	phenylalanyl-tRNA synthetase, alpha subunit	translation
MSMEG4936	ribosomal protein L31	translation
MSMEG1395	translation elongation factor EF-G (fusA)	translation
MSMEG2153	ISPsy4, transposition helper protein	Transposon related
MSMEG1866	IS1404 transposase	Transposon related
MSMEG1263	probable ribosylglycoyhdrolase
