# Supplementary material for: Catalytic and Non-Catalytic Roles for the Mono-ADP-Ribosyltransferase Arr in the Mycobacterial DNA Damage Response
Source: PLoS One. 2011 Jul 18;6(7):e21807. doi: 10.1371/journal.pone.0021807 (PMC3138739; doi:10.1371/journal.pone.0021807)
Supplement: Table S3 — I-SceI microarray- Genes organized by functional category that are upregulated 1.5× only in the site(+) strain, and not in site(−), during stationary (stat) growth following ATc addition. The increase in transcript levels is expressed as a ratio of levels at T = 45/T = 0. p-value≤0.5. (XLSX) [file pone.0021807.s003.xlsx]

## Sheet: Table S3
Table S3. I-SceI microarray- Genes organized by functional category that are upregulated 1.5x only in the site+ strain during stationary (stat) growth following ATc addition
Gene Name	Common Name	TIGR functional category
MSMEG5354	glutamine synthetase, type I	Amino acid biosynthesis
MSMEG4518	trpE2	Amino acid biosynthesis
MSMEG5513	chorismate mutase	Amino acid biosynthesis
MSMEG0798	hydrolase	cell envelope
MSMEG3195	Acyltransferase family domain protein	Cell envelope
MSMEG5919	Polysaccharide deacetylase family	cell envelope
MSMEG0151	oxcA	Cellular processes, Detoxification
MSMEG0006	DNA gyrase, A subunit	DNA repair/replication
MSMEG1654	exodeoxyribonuclease III	DNA repair/replication
MSMEG1946	UvrD/REP helicase domain protein	DNA repair/replication
MSMEG6901	chromosomal replication initiator protein DnaA	DNA repair/replication
MSMEG3014	metallopeptidase, zinc binding	enzyme-unknown specificity
MSMEG5800	metallo-beta-lactamase superfamily domain protein	enzyme-unknown specificity
MSMEG5497	bacterial luciferase family protein	enzyme-unknown specificity
MSMEG1454	glcG protein	enzyme-unknown specificity
MSMEG5935	methyltransferase, putative	enzyme-unknown specificity
MSMEG2491	oxidoreductase, FAD-binding, putative	enzyme-unknown specificity
MSMEG2545	phosphatidate cytidylyltransferase	Fatty acid and phospholipid metabolism
MSMEG3238	acyl-CoA thioesterase II	Fatty acid and phospholipid metabolism,
MSMEG4825	acyl-CoA dehydrogenase family protein	Fatty acid and phospholipid metabolism,
MSMEG6358	esterase, putative	Fatty acid and phospholipid metabolism,
MSMEG0416	hsp	heat shock/Protein fate
MSMEG0066	conserved hypothetical protein	hypothetical protein
MSMEG0075	conserved hypothetical protein	hypothetical protein
MSMEG0717	conserved hypothetical protein	hypothetical protein
MSMEG0886	hypothetical protein	hypothetical protein
MSMEG0891	hypothetical protein	hypothetical protein
MSMEG1775	conserved hypothetical protein	hypothetical protein
MSMEG1871	hypothetical protein	hypothetical protein
MSMEG2070	hypothetical protein	hypothetical protein
MSMEG2441	conserved hypothetical protein	hypothetical protein
MSMEG2631	hypothetical protein	hypothetical protein
MSMEG2829	conserved hypothetical protein	hypothetical protein
MSMEG3268	hypothetical protein	hypothetical protein
MSMEG3503	conserved hypothetical protein	hypothetical protein
MSMEG3939	conserved hypothetical protein	hypothetical protein
MSMEG4762	hypothetical protein	hypothetical protein
MSMEG4827	hypothetical protein	hypothetical protein
MSMEG6053	conserved hypothetical protein	hypothetical protein
MSMEG6176	conserved hypothetical protein	hypothetical protein
MSMEG6898	Hypothetical UPF0161 protein Rv3922c/MT4040.1/Mb3953c	hypothetical protein
MSMEG5487	blr1152	hypothetical protein
MSMEG3475	bll4299	hypothetical protein
MSMEG1773	CG9081-PA, putative	hypothetical protein
MSMEG0039	putative membrane protein	Membrane/transport		m
MSMEG0542	aliphatic sulfonates ABC transporter, ATP-binding protein	Membrane/transport		t
MSMEG0819	drug transport protein, putative	Membrane/transport		t
MSMEG2001	major facilitator family transporter CC0814 [imported], interruption-C	Membrane/transport		t
MSMEG2091	ftsE protein, putative	Membrane/transport		m
MSMEG2525	ABC transporter, permease protein, putative	Membrane/transport		t
MSMEG3998	dicarboxylate MFS transporter	Membrane/transport		t
MSMEG4752	polyamine ABC transporter, permease protein	Membrane/transport		t
MSMEG5126	probable nitrate/nitrite transporter	Membrane/transport		t
MSMEG5977	sugar ABC transporter, ATP-binding protein	Membrane/transport		t
MSMEG6631	spermidine/putrescine ABC transporter, ATP-binding protein	Membrane/transport		t
MSMEG2729	glnH, putative	Membrane/transport		t
MSMEG0241	membrane protein, MmpL family	Membrane/transport		t
MSMEG0931	exopolyphosphatase	metabolism
MSMEG1970	oxidoreductase homolog	metabolism
MSMEG2308	probable electron transfer oxidoreductase, putative	metabolism
MSMEG3918	oxidoreductase of short-chain	metabolism
MSMEG4422	alcohol dehydrogenase, zinc-containing, putative	metabolism
MSMEG4103	xenobiotic compound monooxygenase, DszA family, A subunit	metabolism
MSMEG3064	guanylate kinase	Purines, pyrimidines, nucleosides, and nucleotides
MSMEG5068	glycogen synthase	sugar metabolism
MSMEG0848	DNA-binding response regulator, LuxR family	transcription factor
MSMEG3969	putative TetR/AcrR-family transcriptional regulator	transcription factor
MSMEG5989	probable regulatory protein	transcription factor
MSMEG6319	probable transcriptional regulator, putative	transcription factor
MSMEG6518	transcriptional regulator, TetR family domain protein	transcription factor
MSMEG6777	transcription regulator, MarR family [imported]	transcription factor
MSMEG1358	ribosomal protein L7/L12	translation
MSMEG1433	ribosomal protein S10	translation
MSMEG1441	ribosomal protein L16	translation
MSMEG1518	translation initiation factor IF-1	translation
MSMEG1655	tryptophanyl-tRNA synthetase	translation
MSMEG6858	ribosomal protein S6	translation
MSMEG2972	Preprotein translocase subunit, putative	transposon related
MSMEG3890	Sec-independent protein translocase TatA	transposon related
MSMEG2744	LysM domain protein
MSMEG1095	N5,N10-methylenetetrahydromethanopterin reductase-related protein
MSMEG4503	mbtG
