# Supplementary material for: Catalytic and Non-Catalytic Roles for the Mono-ADP-Ribosyltransferase Arr in the Mycobacterial DNA Damage Response
Source: PLoS One. 2011 Jul 18;6(7):e21807. doi: 10.1371/journal.pone.0021807 (PMC3138739; doi:10.1371/journal.pone.0021807)
Supplement: Table S4 — I-SceI microarray- Genes upregulated 2× throughout all timepoints in log phase site(+) cultures as compared to site(−). p-value≤0.5. (XLSX) [file pone.0021807.s004.xlsx]

## Sheet: Table S4
Table S4. I-SceI microarray- genes upregulated 2x throughout all timepoints in log phase site+ cultures
	Log T=0min site+/site-		Log T=45min site+/site-
Systematic	Normalized	t-test P-value	Normalized	t-test P-value	Common Name
MSMEG0323	2.45804	0.00214611	2.20627	0.00277043	blr1330
MSMEG0376	2.37824	0.000661574	2.01149	0.000100621	conserved hypothetical protein
MSMEG0416	4.04323	5.42124e-06	4.06468	8.987e-05	hsp
MSMEG0442	4.85362	0.00422155	2.11497	0.00277409	gluconate permease
MSMEG0548	4.83374	8.62754e-05	4.04784	3.94358e-05	hypothetical protein
MSMEG0625	4.12398	0.000140295	2.64646	0.000684603	PAP2 superfamily domain protein
MSMEG0633	6.60524	1.42713e-05	2.83972	1.46581e-07	dipeptide ABC transporter, permease protein (dppB)
MSMEG0831	2.59691	0.00437785	2.34512	0.00029222	hypothetical protein
MSMEG1214	4.49005	0.000200685	4.78537	0.000150788	rifampin ADP-ribosyl transferase
MSMEG1223	2.47048	0.01262	2.3792	0.000994163	hypothetical protein
MSMEG1238	2.27871	0.000222303	2.81544	5.9911e-05	conserved hypothetical protein
MSMEG1518	2.88149	0.0016317	2.02522	6.44607e-05	translation initiation factor IF-1
MSMEG1539	5.85623	5.60201e-06	2.71281	6.76354e-05	Superfamily II DNA and RNA helicases
MSMEG1589	3.31242	0.000379837	3.43937	0.00124819	hypothetical protein
MSMEG1785	2.04005	0.0111464	2.02185	1.09041e-05	hypothetical protein
MSMEG1933	6.01102	1.62339e-07	2.50817	1.50809e-05	rhlE
MSMEG2089	8.50855	0.000209039	3.18251	0.000109341	hypothetical protein
MSMEG2258	2.15197	0.000825489	2.66441	0.000154284	propionyl-CoA carboxylase, beta chain
MSMEG2298	6.96831	0.000410187	2.99254	3.00493e-05	nrdH-related protein
MSMEG2299	2.72757	0.00107518	2.62298	8.56797e-06	NrdI protein
MSMEG2300	3.27038	0.000160776	2.75861	1.56662e-06	ribonucleoside-diphosphate reductase alpha chain
MSMEG3114	3.45911	0.00372962	2.01076	1.01941e-06	protoheme IX farnesyltransferase
MSMEG3153	2.03537	0.00694879	2.52941	0.00452752	NLP/P60 family protein
MSMEG3626	3.08343	3.63204e-10	2.05508	0.000311395	Luciferase-like monooxygenase superfamily
MSMEG3899	3.24551	0.000195057	2.15828	2.8945e-06	proteasome beta subunit
MSMEG4265	3.07613	6.18885e-05	2.30104	1.35097e-06	Rieske Fe-S Protein
MSMEG4303	2.78753	0.000314702	2.21936	0.0026151	transcription regulator AmtR
MSMEG5029	2.72861	0.00123195	2.01236	0.000868495	acyltransferase
MSMEG5037	2.70093	0.000373186	2.60329	0.000375086	2-oxoglutarate dehydrogenase E1 component
MSMEG5771	6.8698	3.76199e-06	2.33317	0.000517588	hypothetical protein
MSMEG6039	2.07253	0.000100382	2.8343	5.67438e-08	CarD-like transcriptional regulator family
MSMEG6385	5.17094	2.18582e-06	3.24343	4.02294e-09	bfrB
MSMEG6723	6.67527	0.000152622	3.11359	0.000273706	transcriptional regulator, ArsR family
