# Supplementary material for: Catalytic and Non-Catalytic Roles for the Mono-ADP-Ribosyltransferase Arr in the Mycobacterial DNA Damage Response
Source: PLoS One. 2011 Jul 18;6(7):e21807. doi: 10.1371/journal.pone.0021807 (PMC3138739; doi:10.1371/journal.pone.0021807)
Supplement: Table S8 — Δ arr I-SceI microarray- Genes upregulated 1.5× in Δ arr site(+) as compared to wild-type site(+) and complemented by WT Arr expression but not by expression of ArrH18A, p value<0.05. (XLSX) [file pone.0021807.s008.xlsx]

## Sheet: Table S8
Table S8. Darr I-SceI microarray- Genes upregulated 1.5x in Darr and complemented by WT Arr expression but not by expression of ArrH18A, p value <0.05
Gene	Common Name	Cellular Role	Ratio of Darr to WT	Ratio of Darr/WTArr to WT	Ratio of Darr/ArrH18A to WT	Ratio of Darr/ArrD83A to WT
MSMEG_0713	transcriptional regulator, MerR family		2.08385	1.01073	2.18712	0.555543
MSMEG_1144	virulence factor Mce family protein	Cellular processes: Pathogenesis	1.53477	1.21781	1.64561	4.38855
MSMEG_2103	5,10-methylenetetrahydromethanopterin reductase	Energy metabolism: Methanogenesis	4.95928	0.958101	1.38009	1.29722
MSMEG_2240	Cytochrome P450	Central intermediary metabolism, detoxification	1.52082	1.0885	1.28779	1.43601
MSMEG_4297	acyltransferase, ws/dgat/mgat subfamily	Cell envelope: Biosynthesis and degradation of surface polysaccharides and lipopolysaccharides	2.67266	0.73635	45.3184	6.83076
MSMEG_4339	tetratricopeptide repeat family	unknown	1.5281	1.23717	1.39203	1.13162
MSMEG_4839	carboxymuconolactone decarboxylase	Energy metabolism: Other	2.52347	0.866519	1.96004	0.670737
MSMEG_5489	rpmF, ribosomal protein L32	Protein synthesis: Ribosomal proteins: synthesis and modification	1.50671	1.20336	1.26231	1.05502
MSMEG_6034	hypothetical protein		1.88766	0.884152	1.6046	1.14937
MSMEG_6761	glycerol-3-phosphate dehydrogenase 2	Energy metabolism: Anaerobic	1.55552	0.987829	1.64403	1.45739
