# Supplementary material for: Catalytic and Non-Catalytic Roles for the Mono-ADP-Ribosyltransferase Arr in the Mycobacterial DNA Damage Response
Source: PLoS One. 2011 Jul 18;6(7):e21807. doi: 10.1371/journal.pone.0021807 (PMC3138739; doi:10.1371/journal.pone.0021807)
Supplement: Table S9 — Δ arr I-SceI microarray- Genes upregulated 1.5× in Δ arr site(+) as compared to wild-type site(+) and complemented by WT Arr expression but not by expression of ArrD83A, p value<0.05. (XLSX) [file pone.0021807.s009.xlsx]

## Sheet: Table S9
Table S9. Darr I-SceI microarray- Genes upregulated 1.5x in Darr and complemented by WT Arr expression but not by expression of ArrD83A, p value <0.05
Gene	Common Name	Cellular Role	Ratio of Darr to WT	Ratio of Darr/WTArr to WT	Ratio of Darr/ArrH18A to WT	Ratio of Darr/ArrD83A to WT
MSMEG_1144	virulence factor Mce family protein	Cellular processes: Pathogenesis	1.53477	1.21781	1.64561	4.38855
MSMEG_2103	5,10-methylenetetrahydromethanopterin reductase	Energy metabolism: Methanogenesis	4.95928	0.958101	1.38009	1.29722
MSMEG_2240	Cytochrome P450	Central intermediary metabolism, detoxification	1.52082	1.0885	1.28779	1.43601
MSMEG_4297	acyltransferase, ws/dgat/mgat subfamily	Cell envelope: Biosynthesis and degradation of surface polysaccharides and lipopolysaccharides	2.67266	0.73635	45.3184	6.83076
MSMEG_5393	kdpB, K+-transporting ATPase, B subunit	Transport and binding proteins: Cations and iron carrying compounds	1.60542	1.00863	1.24102	1.41314
MSMEG_5660	ABC transporter ATP-binding protein	Transport and binding proteins: Unknown substrate	1.51005	1.21712	1.01537	1.30634
MSMEG_6761	glycerol-3-phosphate dehydrogenase 2	Energy metabolism: Anaerobic	1.55552	0.987829	1.64403	1.45739
