# Supplementary material for: Catalytic and Non-Catalytic Roles for the Mono-ADP-Ribosyltransferase Arr in the Mycobacterial DNA Damage Response
Source: PLoS One. 2011 Jul 18;6(7):e21807. doi: 10.1371/journal.pone.0021807 (PMC3138739; doi:10.1371/journal.pone.0021807)
Supplement: Table S11 — Δ arr I-SceI microarray- Genes downregulated 1.5× in Δ arr site(+) as compared to wild-type site(+) and complemented by WT Arr expression but not by expression of ArrH18A, p value<0.05. (XLSX) [file pone.0021807.s011.xlsx]

## Sheet: Table S11
Table S11. Darr I-SceI microarray- Genes downregulated 1.5x in Darr and complemented by WT Arr expression but not by expression of ArrH18A, p value <0.05
Gene	Common Name	Cellular Role	Ratio of Darr to WT	Ratio of Darr/WTArr to WT	Ratio of Darr/ArrH18A to WT	Ratio of Darr/ArrD83A to WT
MSMEG_0217	alcohol dehydrogenase B	Energy metabolism: Fermentation	0.637937	1.18823	0.701209	0.622344
MSMEG_3339	hypothetical protein		0.247813	4.07605	0.137168	0.118295
MSMEG_3932	14 kDa antigen		0.501877	0.821149	0.797099	0.870695
MSMEG_5585	hypothetical protein		0.578591	1.28803	0.789848	0.822585
