# Supplementary material for: Catalytic and Non-Catalytic Roles for the Mono-ADP-Ribosyltransferase Arr in the Mycobacterial DNA Damage Response
Source: PLoS One. 2011 Jul 18;6(7):e21807. doi: 10.1371/journal.pone.0021807 (PMC3138739; doi:10.1371/journal.pone.0021807)
Supplement: Table S12 — Δ arr I-SceI microarray- Genes downregulated 1.5× in Δ arr site(+) as compared to wild-type site(+) and complemented by WT Arr expression but not by expression of ArrD83A, p value<0.05. (XLSX) [file pone.0021807.s012.xlsx]

## Sheet: Table S12
Table S12. Darr I-SceI microarray- Genes downregulated 1.5x in Darr and complemented by WT Arr expression but not by expression of ArrD83A, p value <0.05
Gene	Common Name	Cellular Role	Ratio of Darr to WT	Ratio of Darr/WTArr to WT	Ratio of Darr/ArrH18A to WT	Ratio of Darr/ArrD83A to WT
MSMEG_0217	alcohol dehydrogenase B	Energy metabolism: Fermentation	0.637937	1.18823	0.701209	0.622344
MSMEG_2531	GntR family transcriptional regulator		0.649405	1.00204	1.1706	0.511431
MSMEG_3339	hypothetical protein		0.247813	4.07605	0.137168	0.118295
MSMEG_3388	S-(hydroxymethyl)glutathione dehydrogenase/class III alcohol dehydrogenase	Cellular processes: Detoxification, Energy metabolism: Fermentation	0.396897	0.86403	1.04567	0.641458
MSMEG_4434	Cof protein	Biosynthesis of cofactors, prosthetic groups, and carriers: Molybdopterin	0.340411	1.59361	1.22294	0.633891
MSMEG_6851	phosphatidylethanolamine-binding protein		0.606504	1.4797	2.21081	0.319085
